# Supplementary material
Source: publisher figshare collection journal article supplement (https://acs.figshare.com/ndownloader/files/5194390)
Supplement: Supplementary file 1 [file 5194390]

## SUPPORTING INFORMATION

# TOTAL SYNTHESSES OF VARIOLIN B AND DEOXYVARIOLIN B

Abderaouf Ahaidar,<sup>a,b</sup> David Fernández,<sup>b</sup> Gerardo Danelón,<sup>a</sup> Carmen Cuevas,<sup>c</sup> Ignacio Manzanares,<sup>c</sup> Fernando Albericio,<sup>a,d</sup> John A. Joule,<sup>e</sup> Mercedes Álvarez,<sup>a,b\*</sup>

a Biomedical Research Institute, Barcelona Scientific Park-University of Barcelona, Josep Samitier 1-5, E 08028 Barcelona, Spain; b Laboratory of Organic Chemistry, Faculty of Pharmacy, University of Barcelona, Avda. Joan XXIII s/n, E 08028 Barcelona, Spain; c Pharma Mar, Avda Reyes Católicos 1, 28770 Colmenar Viejo, Madrid, Spain; d Department of Organic Chemistry, Universitat de Barcelona, Martí Franqués 1-11, E 08028 Barcelona, Spain; e Chemistry Department, The University of Manchester, Manchester M13 9PL, U.K.

### List of Contents

|                                                                   |        |
|-------------------------------------------------------------------|--------|
| General Experimental.....                                         | S1     |
| <sup>1</sup> H and <sup>13</sup> C NMR Spectra of Compounds ..... | S3-S44 |

### GENERAL EXPERIMENTAL

Melting points were determined in opened capillaries and are uncorrected. TLC was carried out on SiO<sub>2</sub> (silica Gel 60, 0.063-0.200 mm) and spots were located with UV light. Column chromatography was carried out on SiO<sub>2</sub> (silica Gel 60, 0.060-0.2 mm). Flash chromatography was carried out on SiO<sub>2</sub> (silica Gel 60 A CC). Organic extracts were dried over anhydrous sodium or magnesium sulphate, and solutions were evaporated under reduced pressure with a

---

\* Mercedes Álvarez. Tel.: +34 93 403 70 86; fax: +34 03 403 71 26; e-mail: malvarez@pcb.ub.es.

rotatory evaporator. IR spectra were performed on a FT-IR. NMR data are given in ppm referenced to TMS. Mass spectra were measured for chemical ionisation (CI) with methane (CH<sub>4</sub>, as reactive gas) and electronic impact (EI), or chemical ionisation with ammonia (NH<sub>3</sub>). Photolysis was performed with a 150 W high-pressure mercury lamp under argon atmosphere. Analytical HPLC was performed using a 4.6 x 150 mm C<sub>18</sub> reversed-phase column (Symmetry 5 μm) with photodiode array detector. Preparative HPLC was performed using a 30 x 100 mm semipreparative C<sub>18</sub> reversed-phase column (Symmetry 5 μm) with dual λ absorbance detector. Reactions under pressure were performed on a small reactor provided with automatic temperature control.

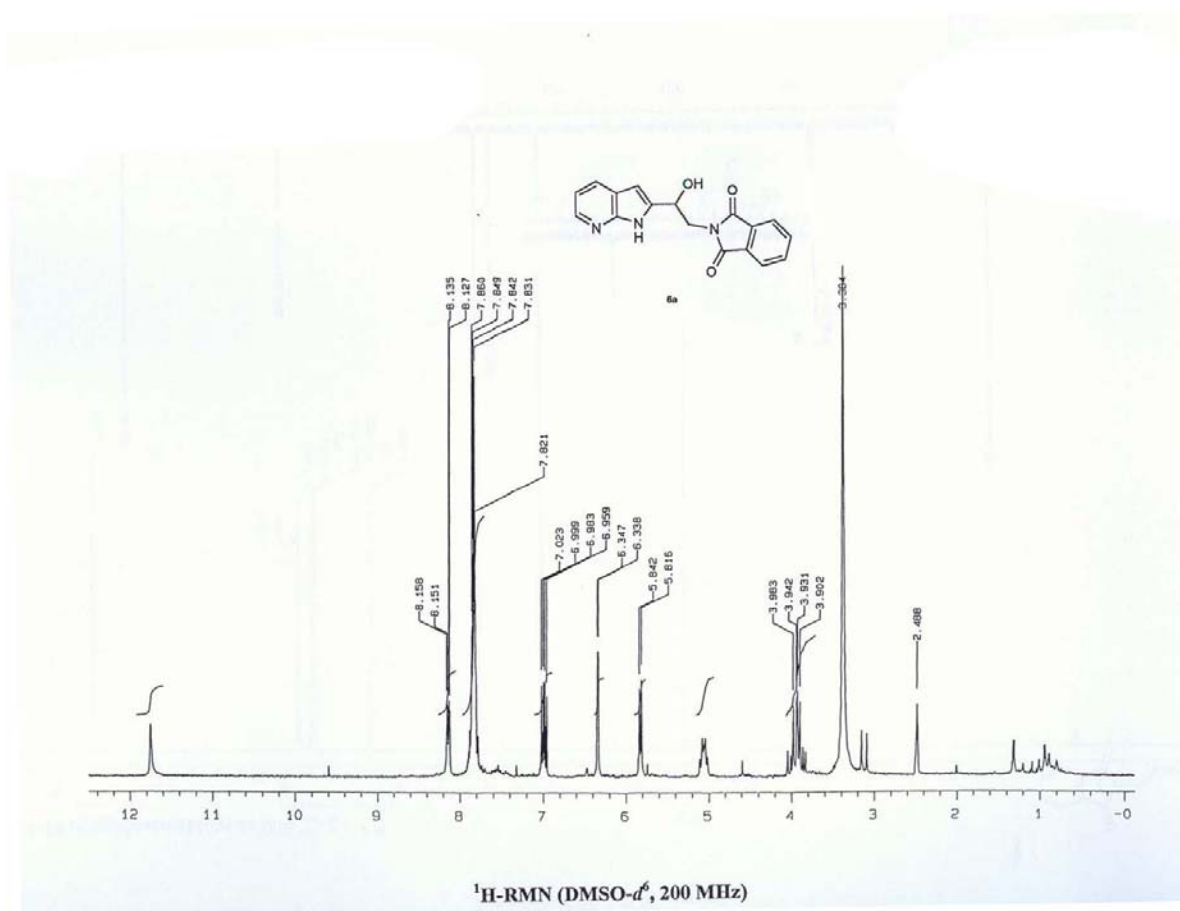

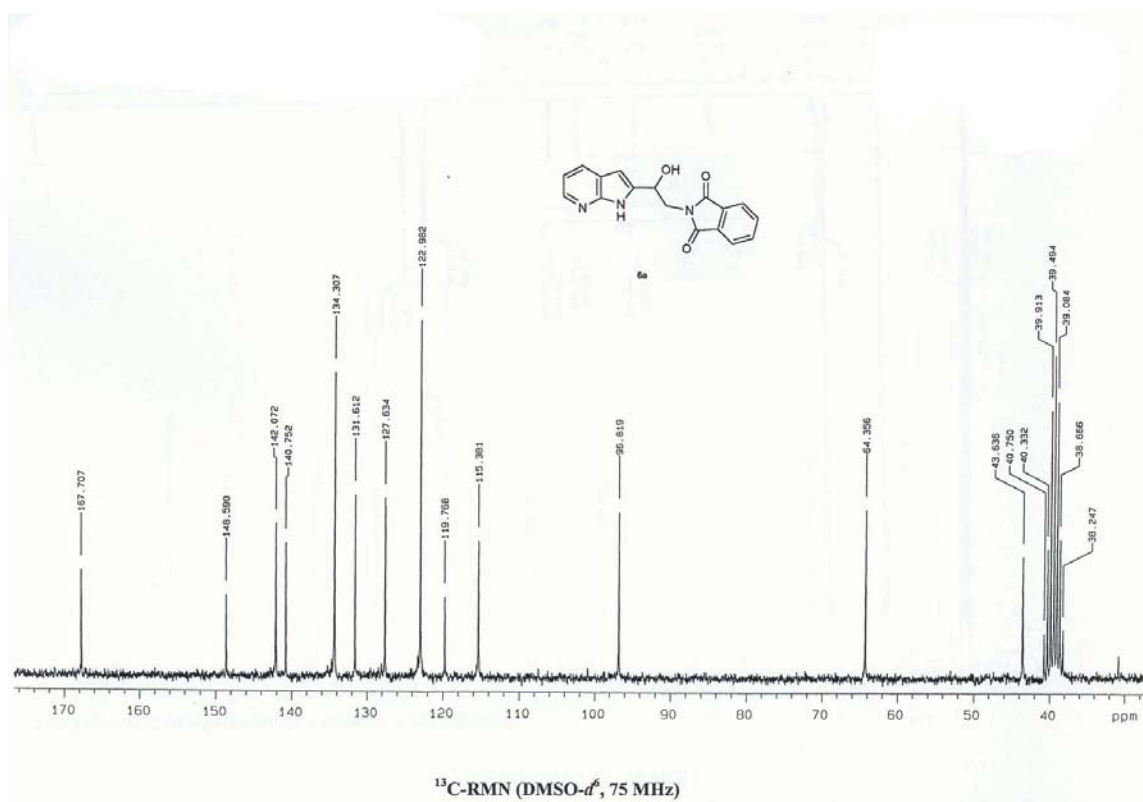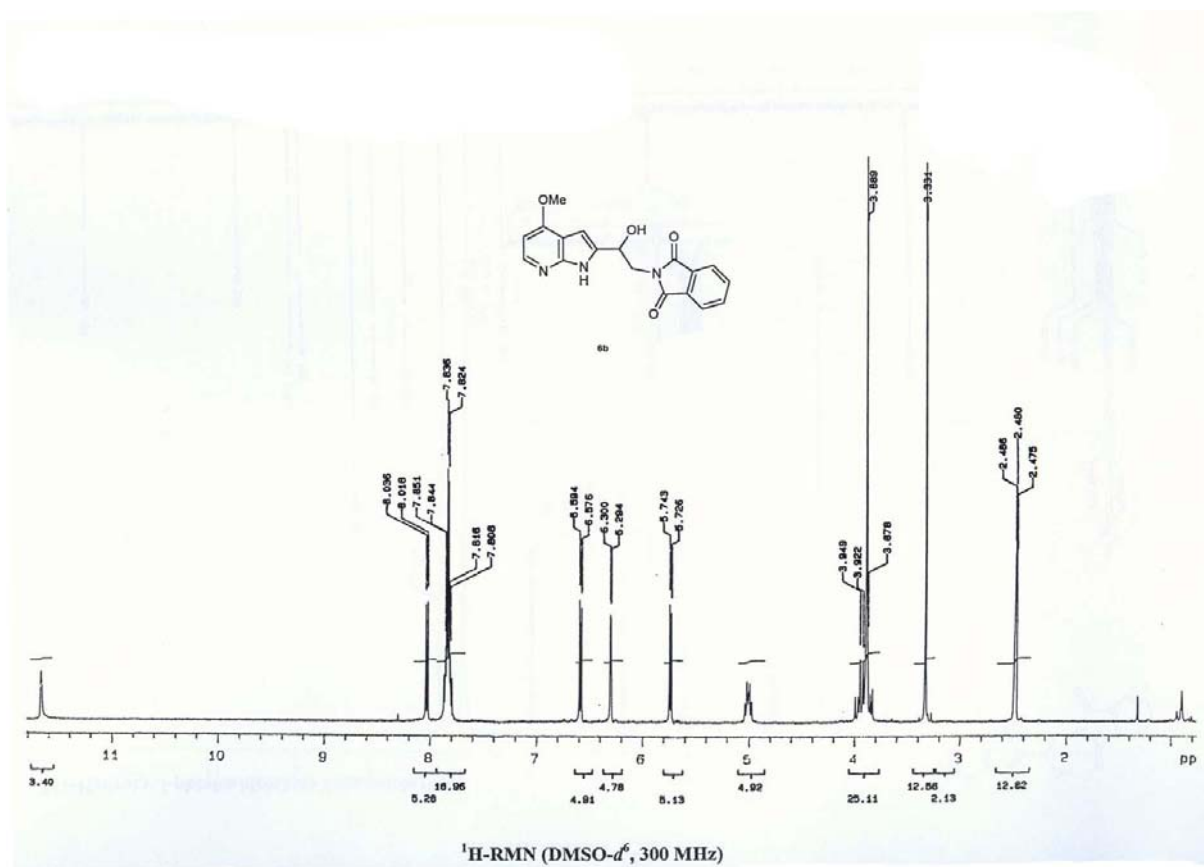

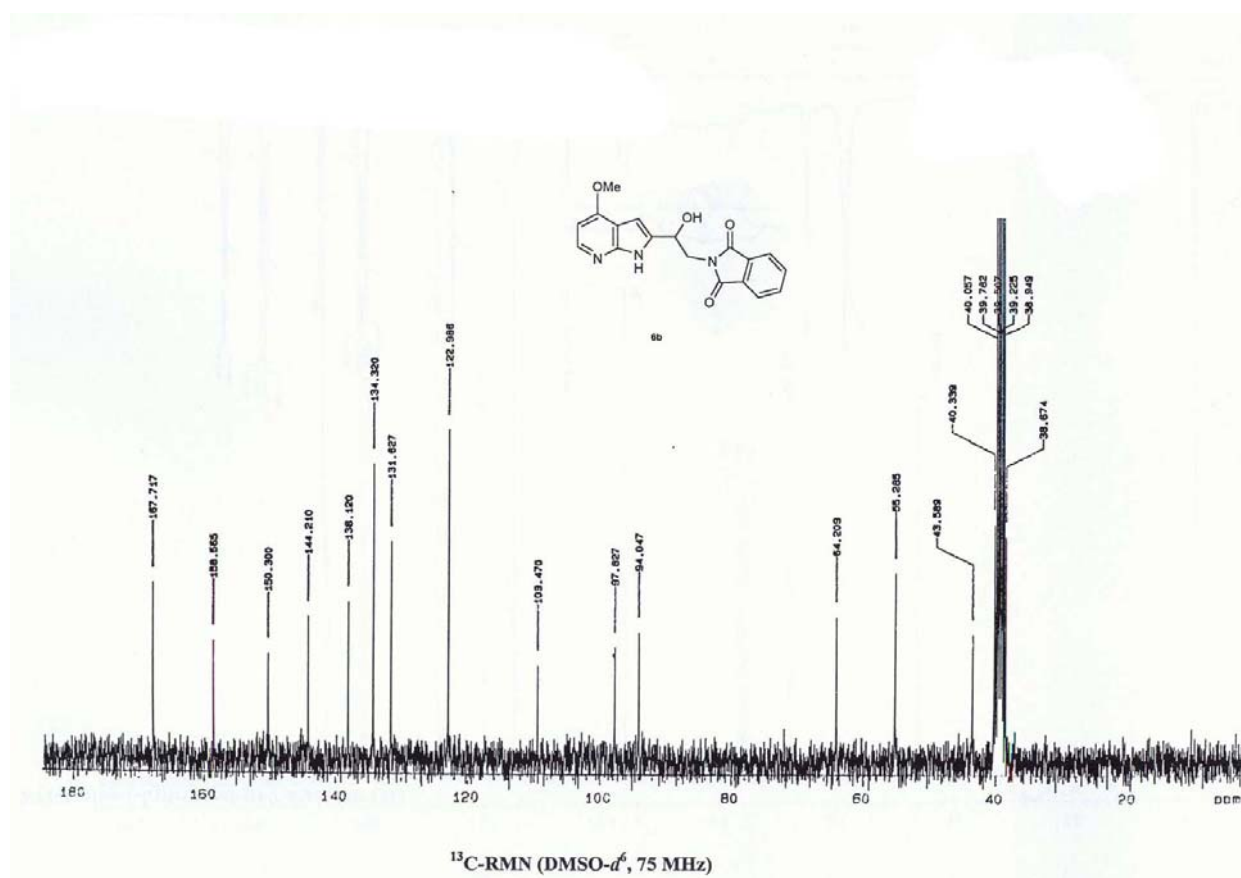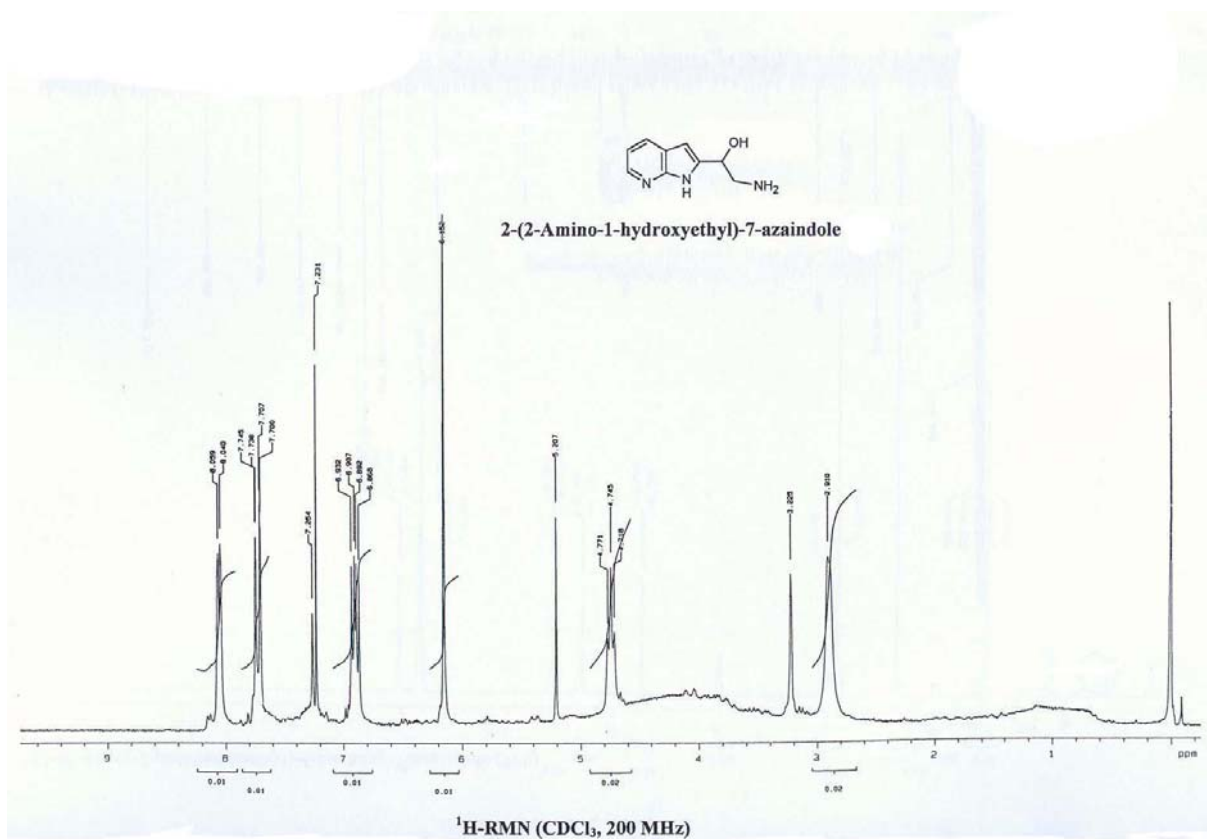

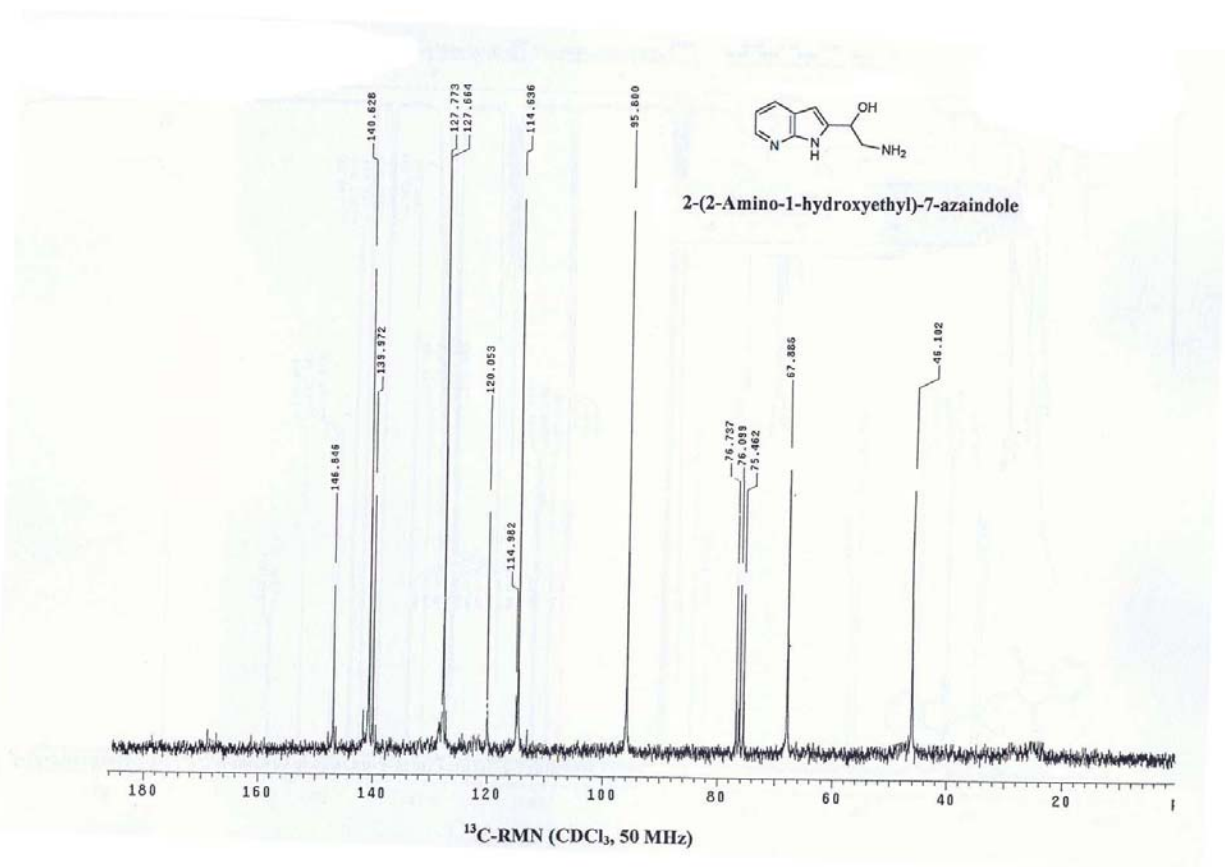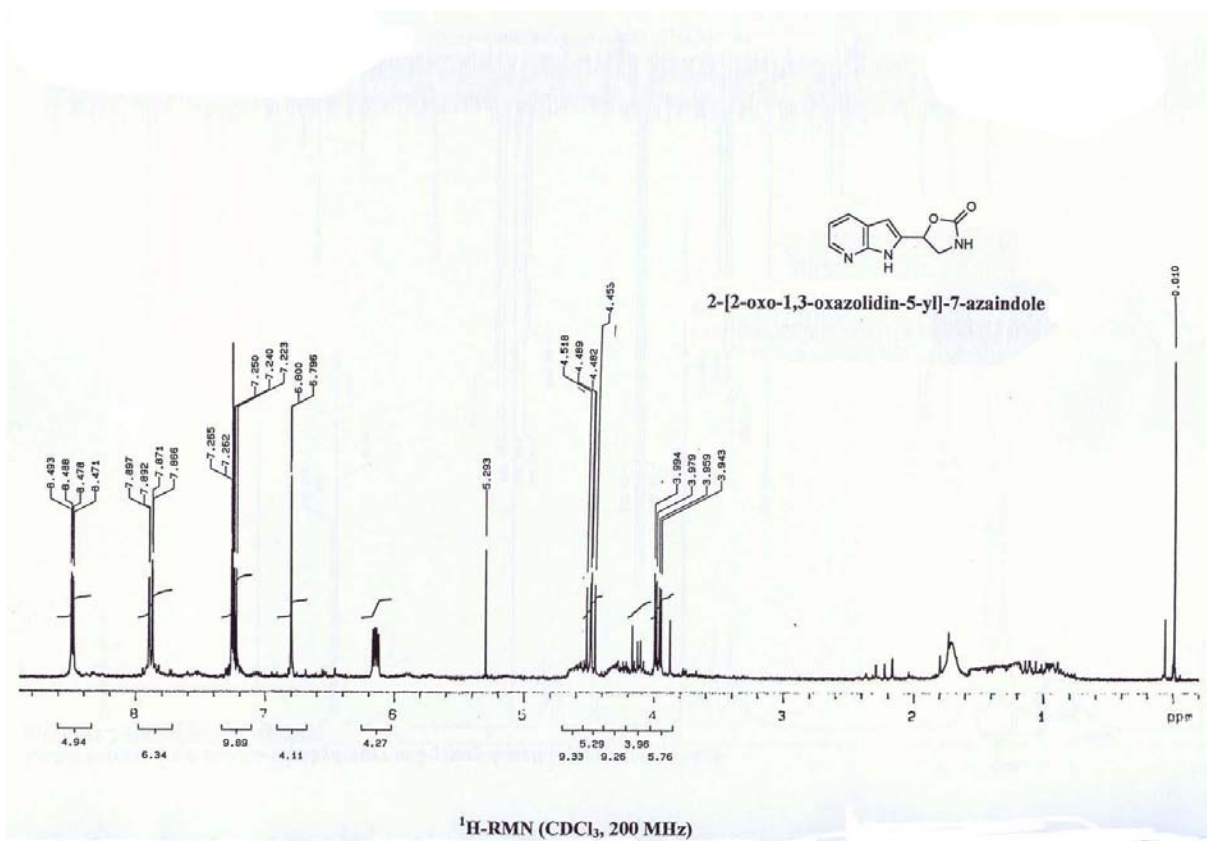

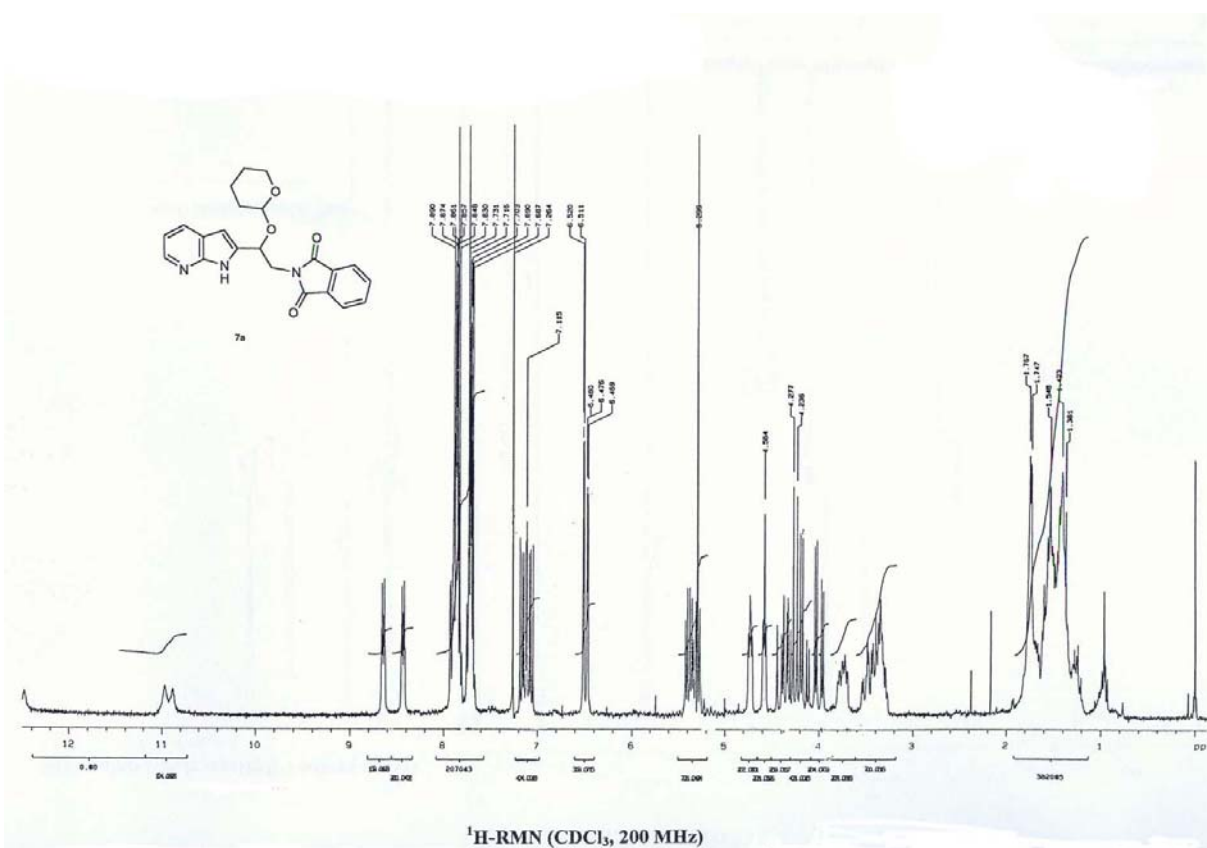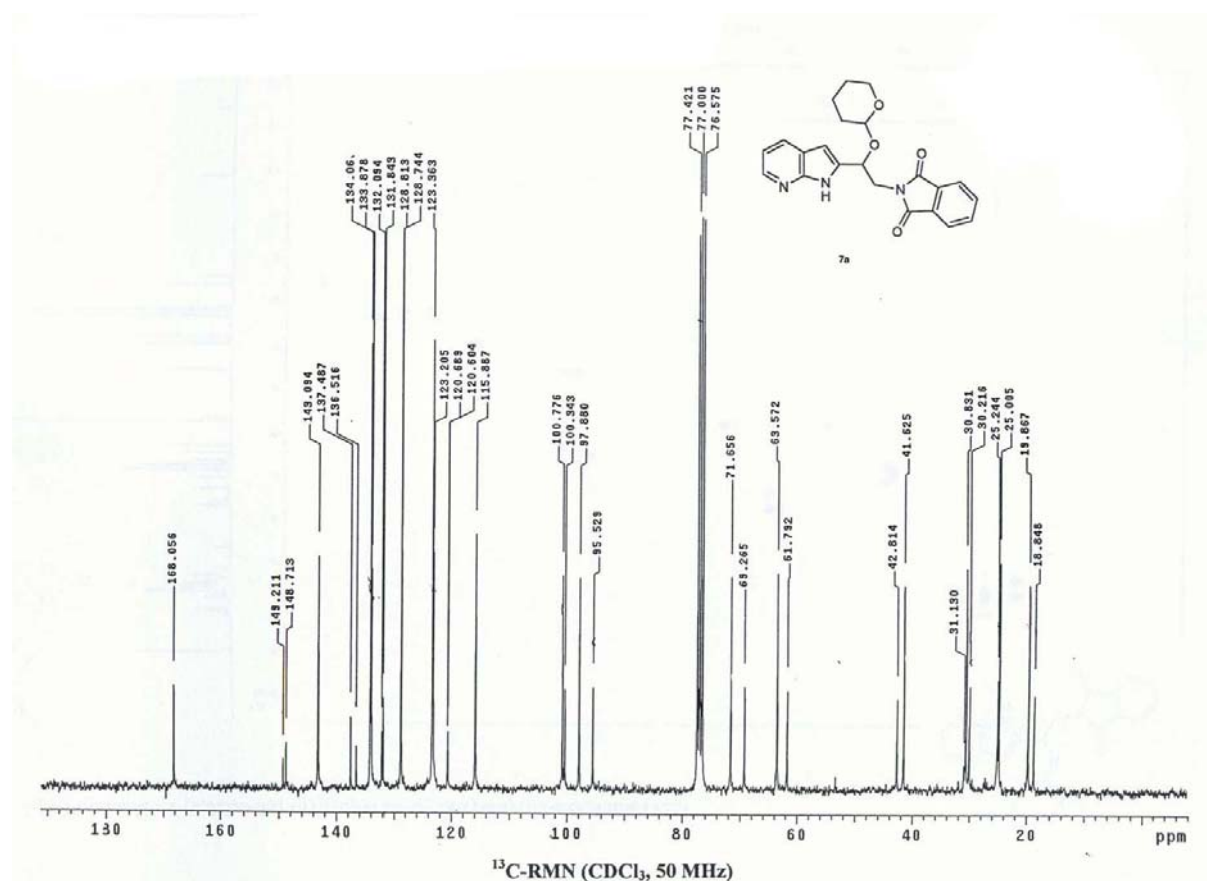

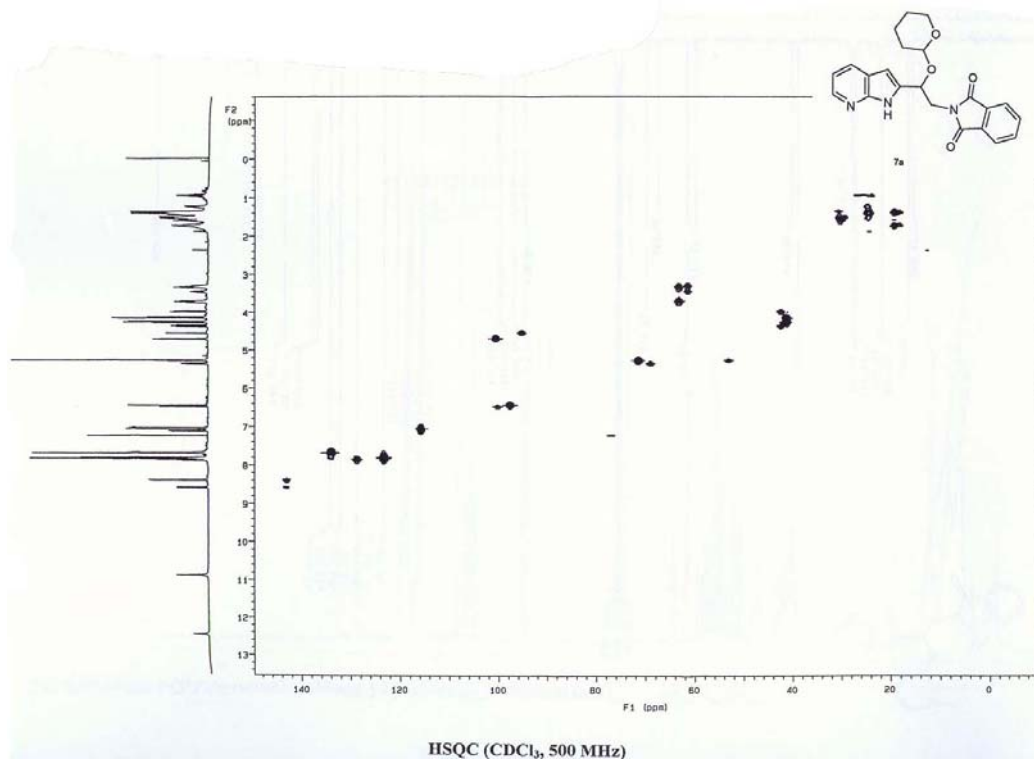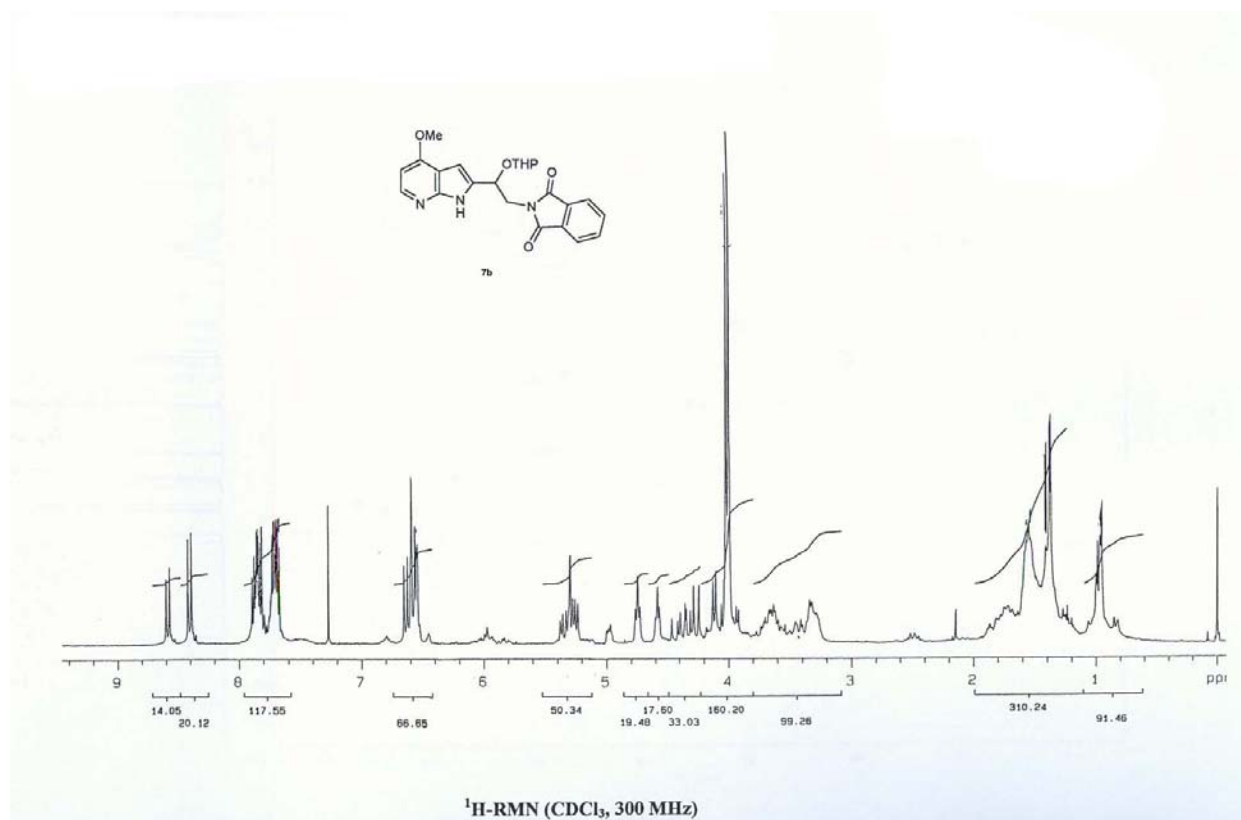



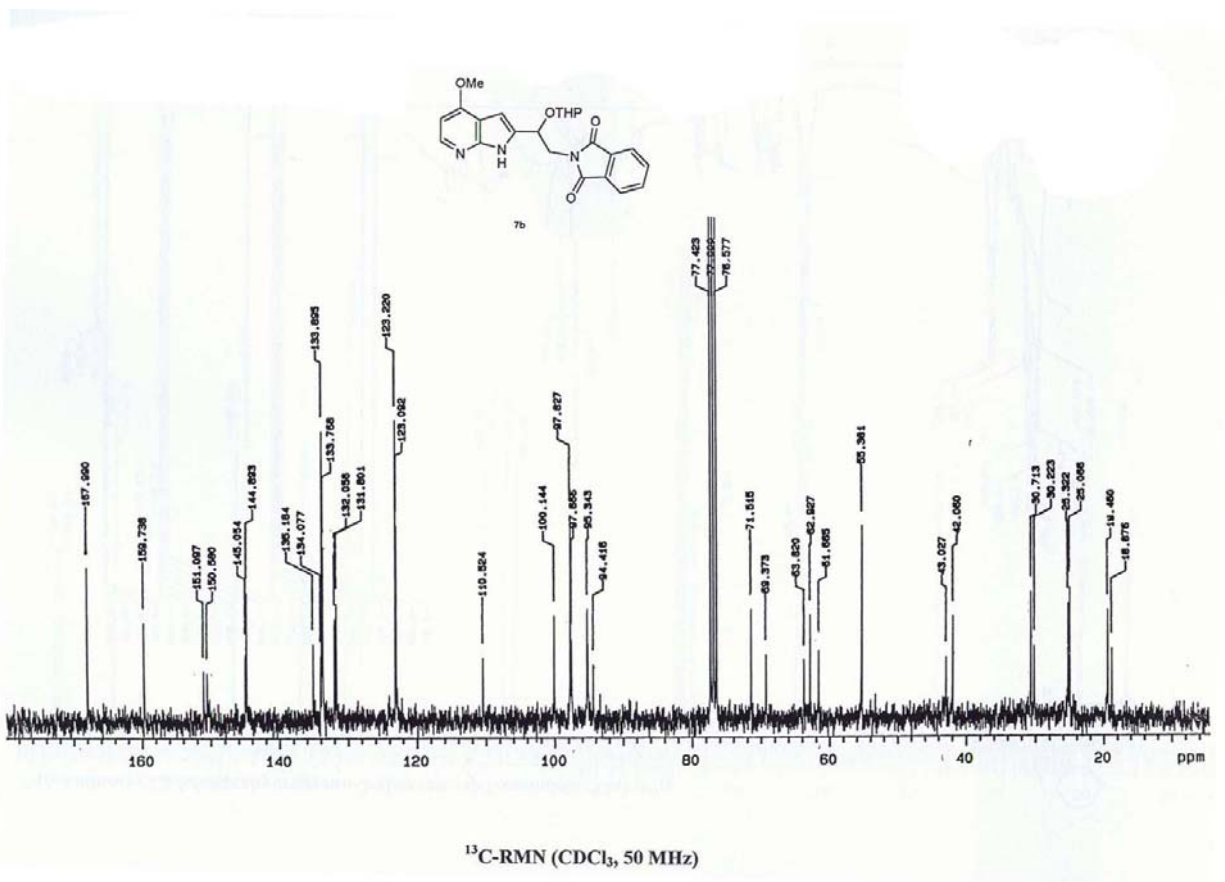





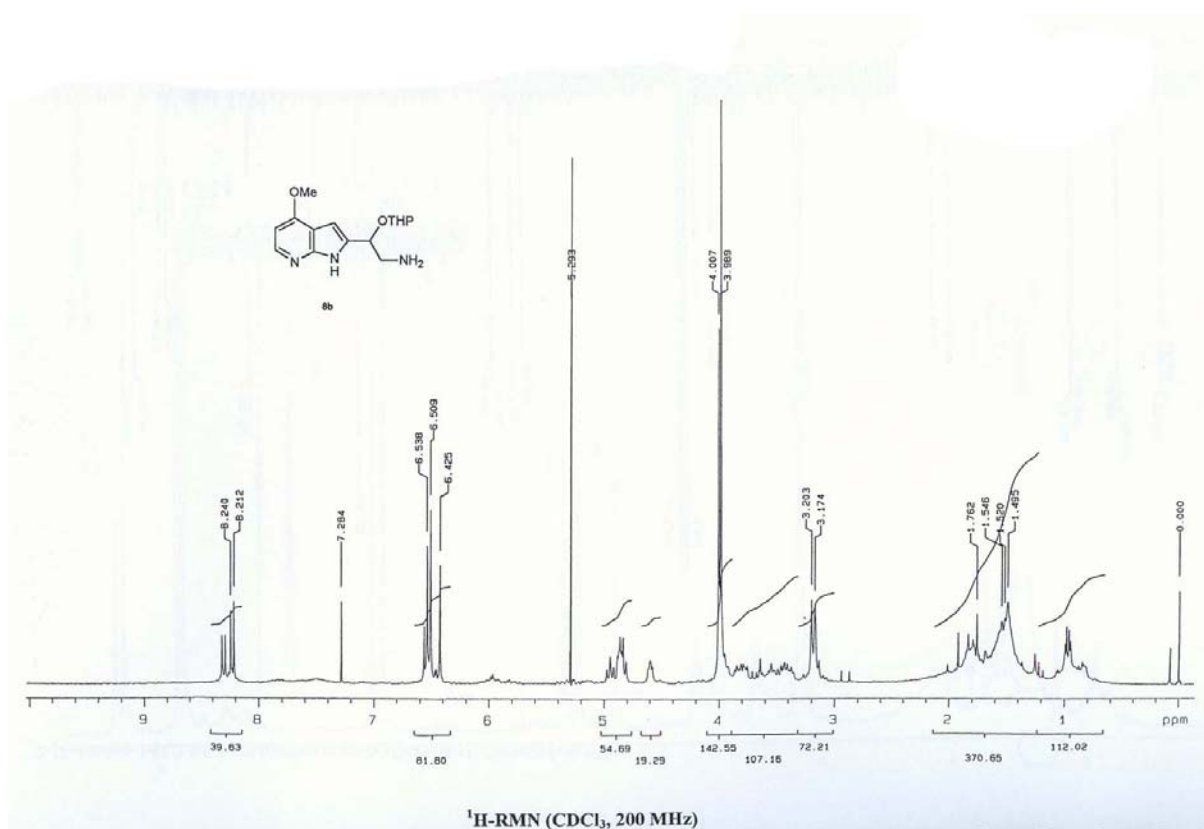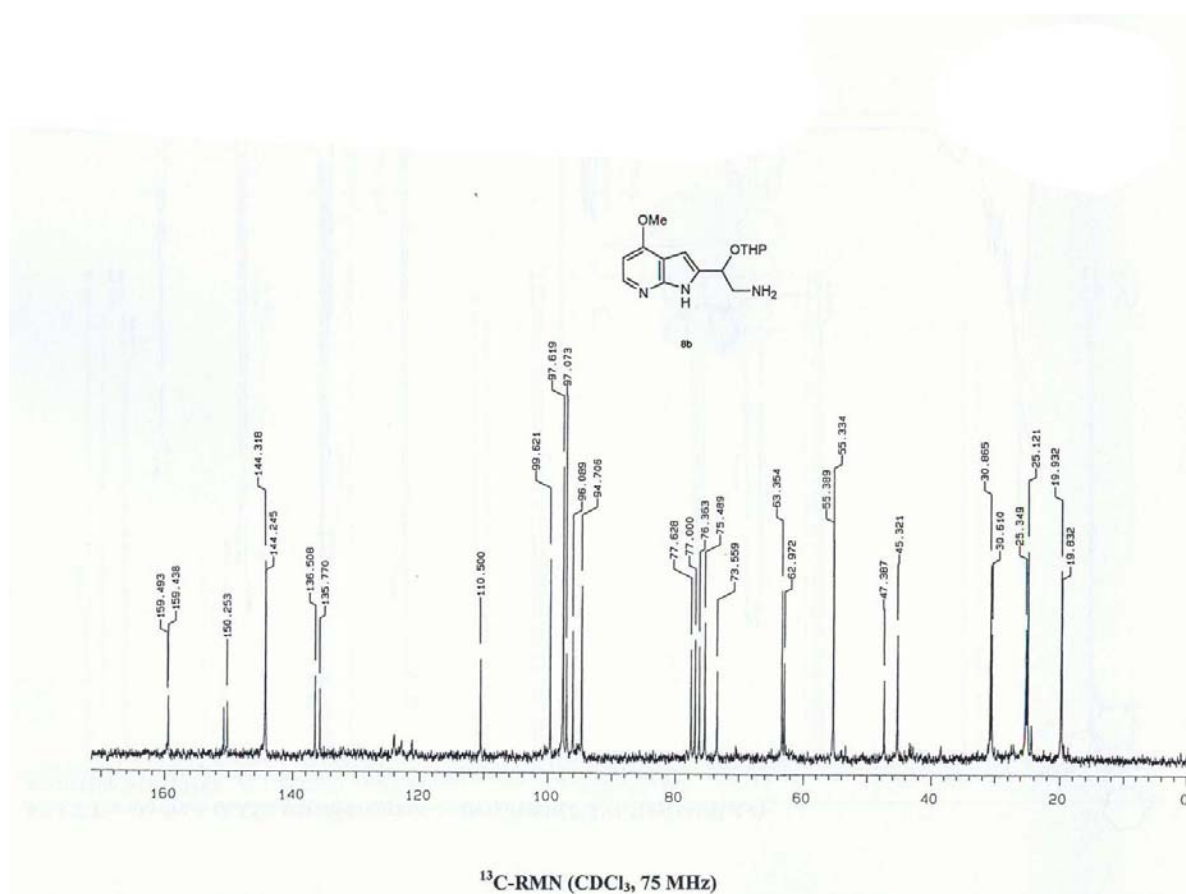

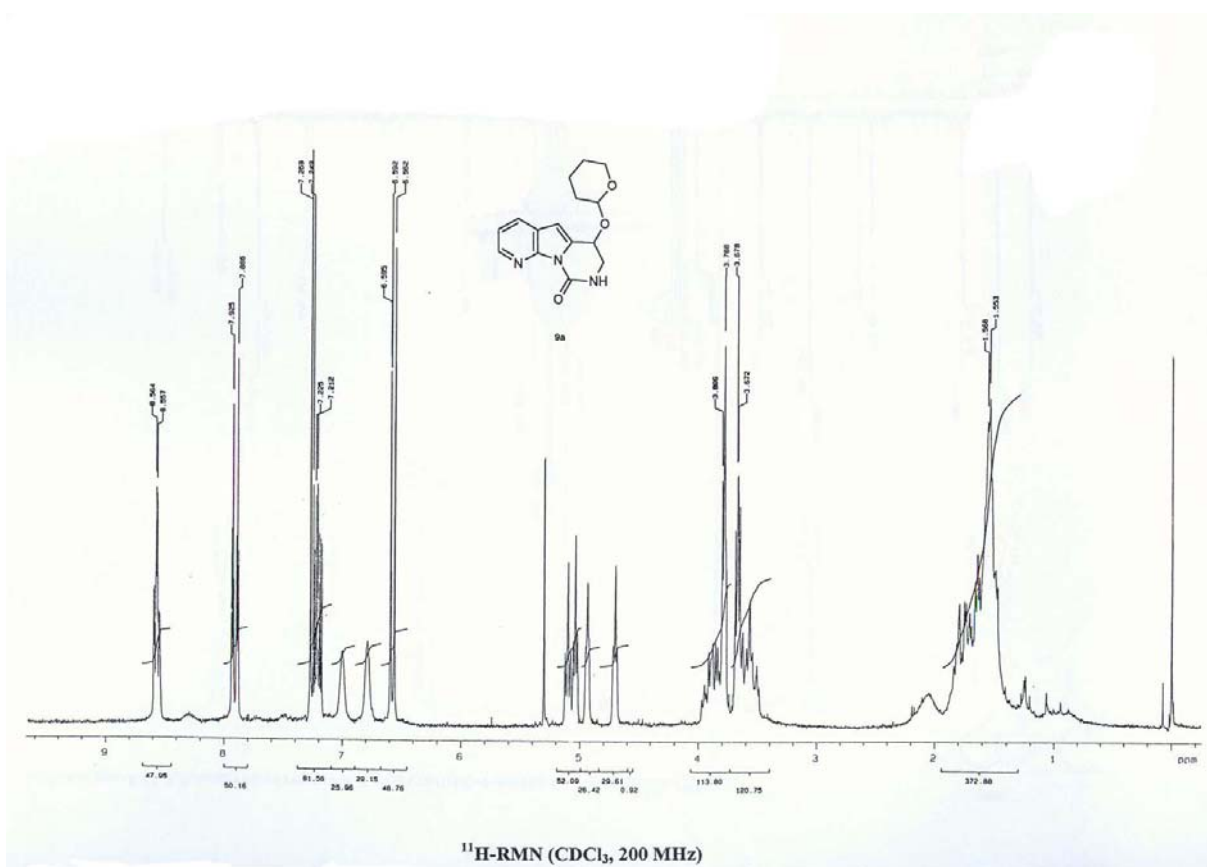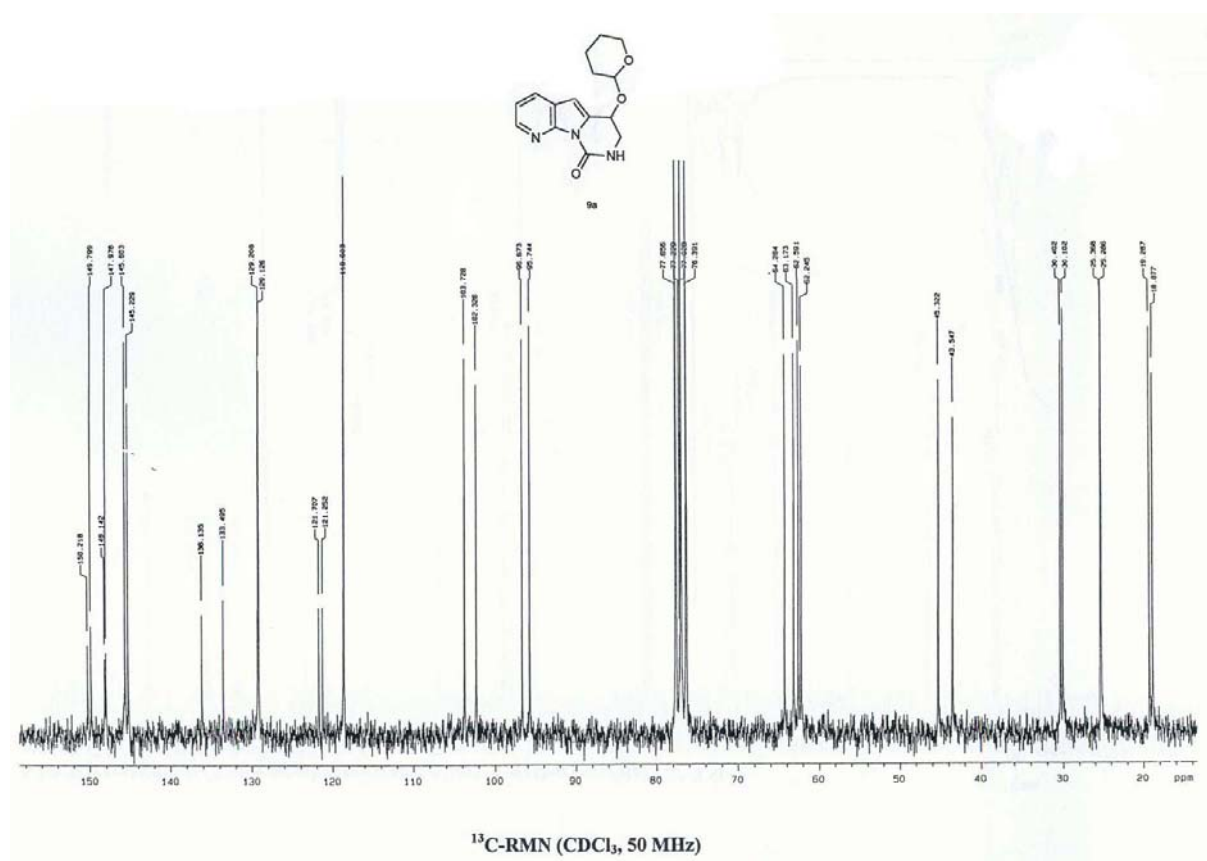

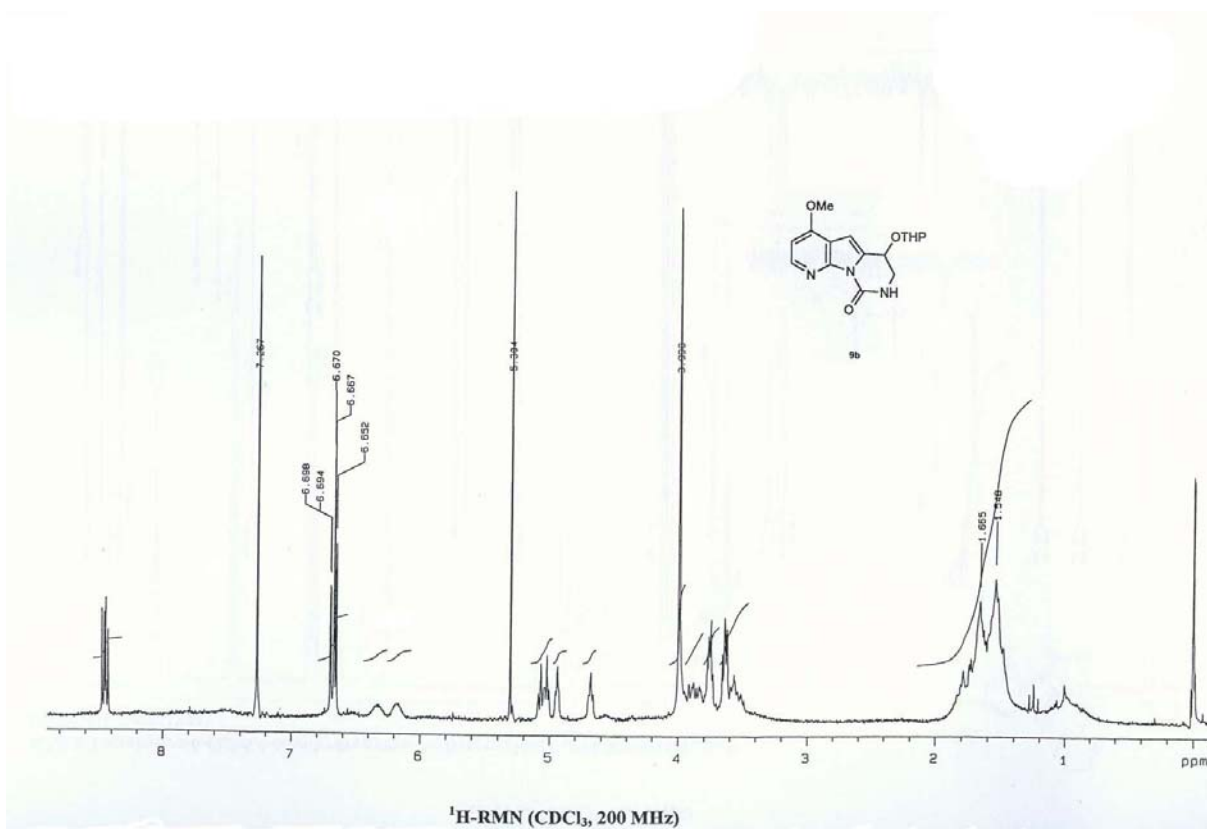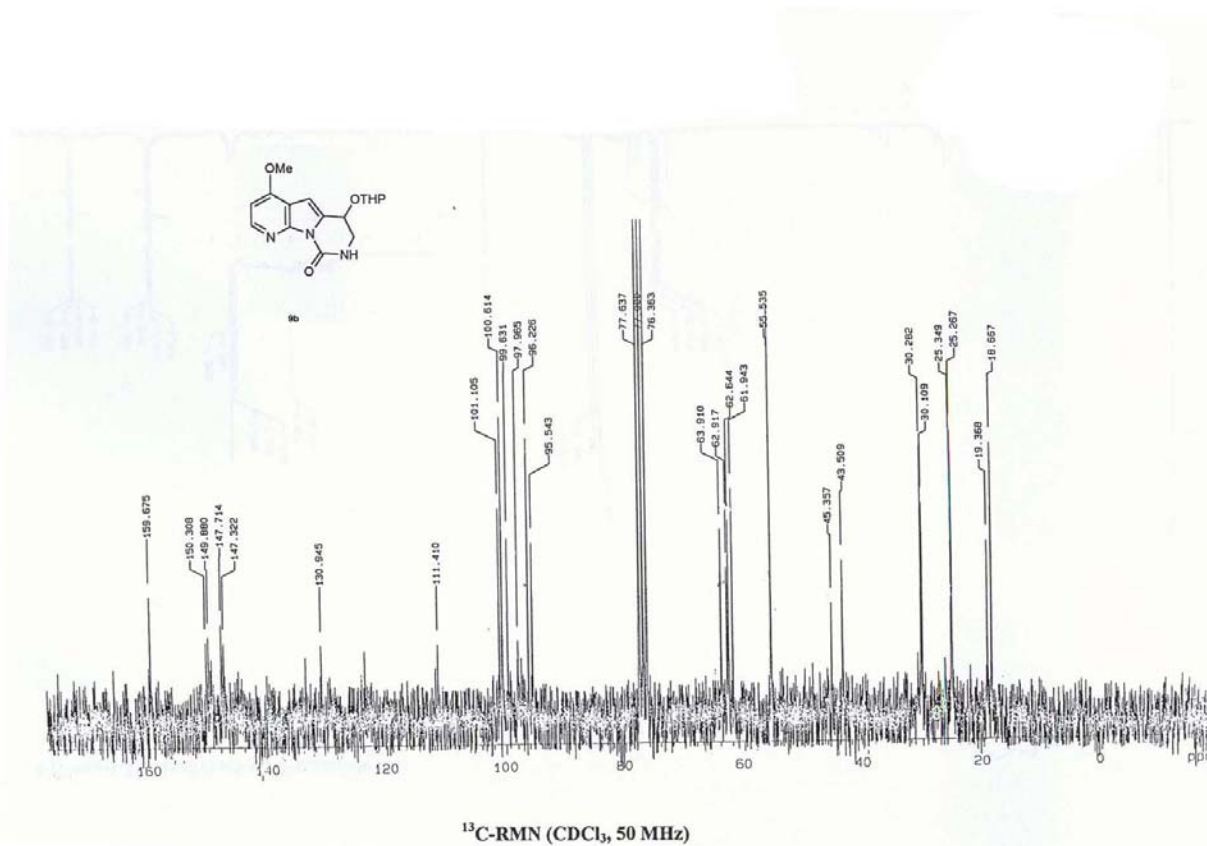

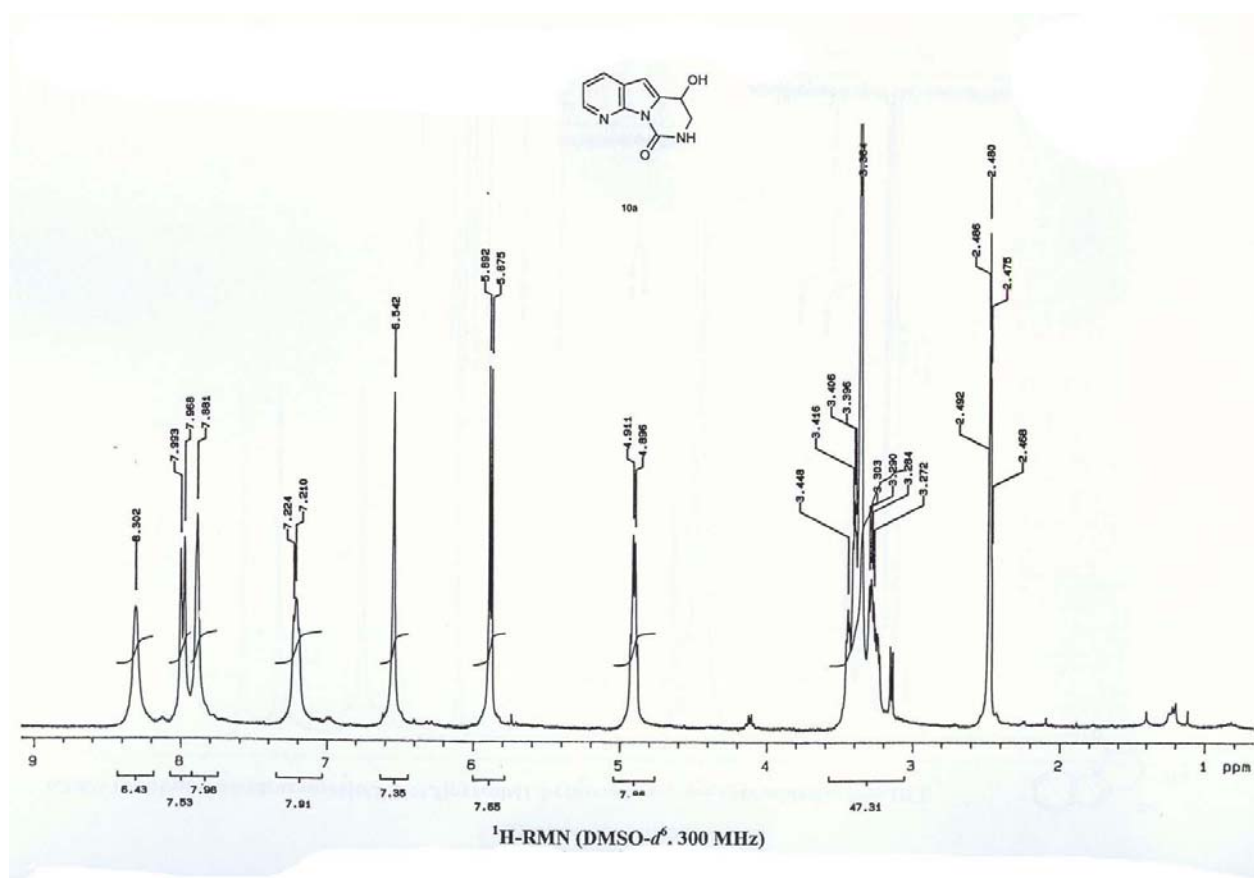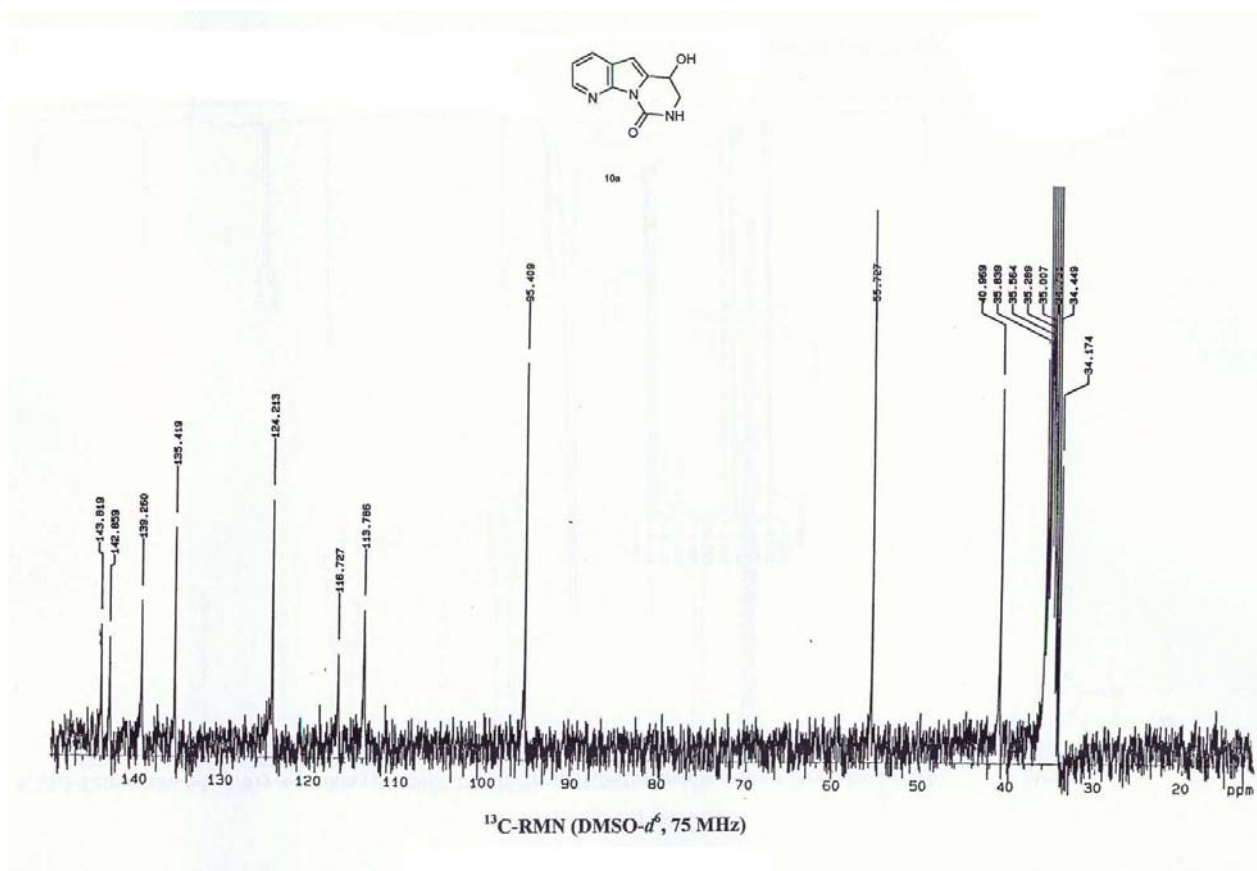



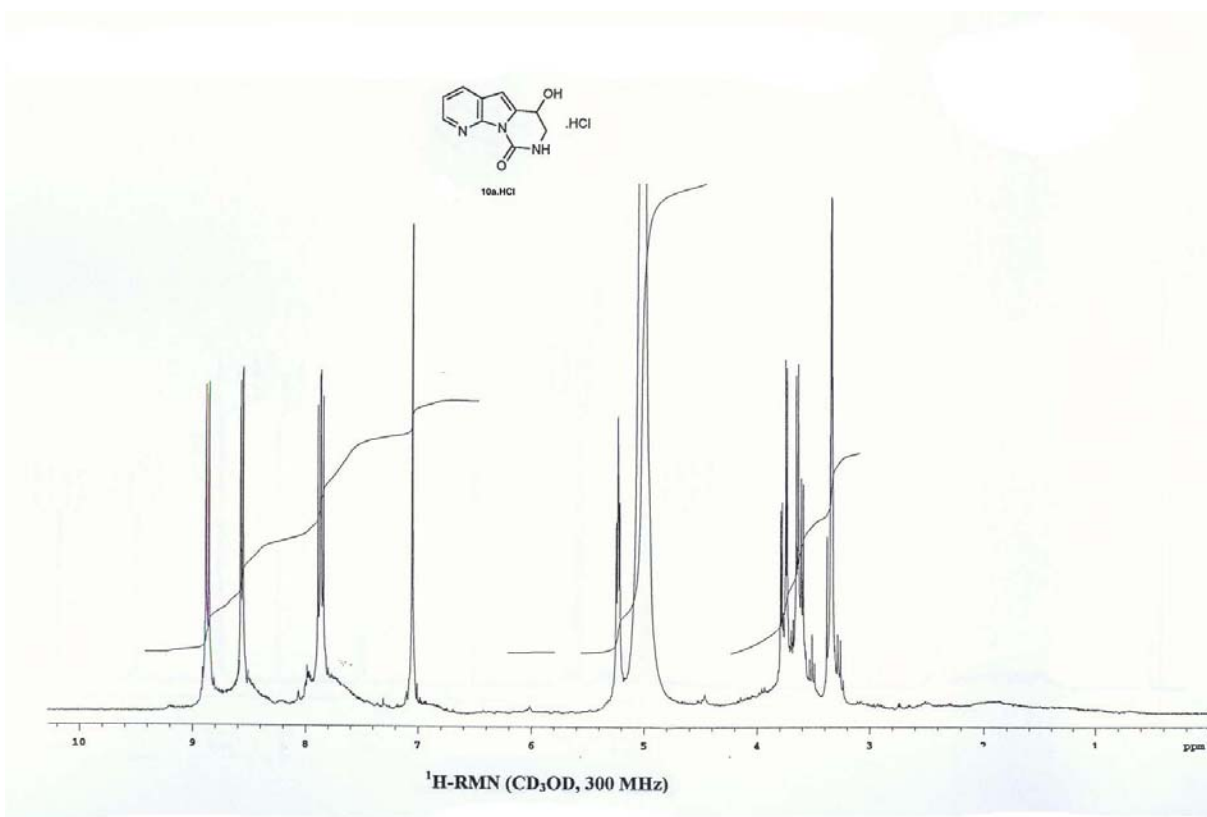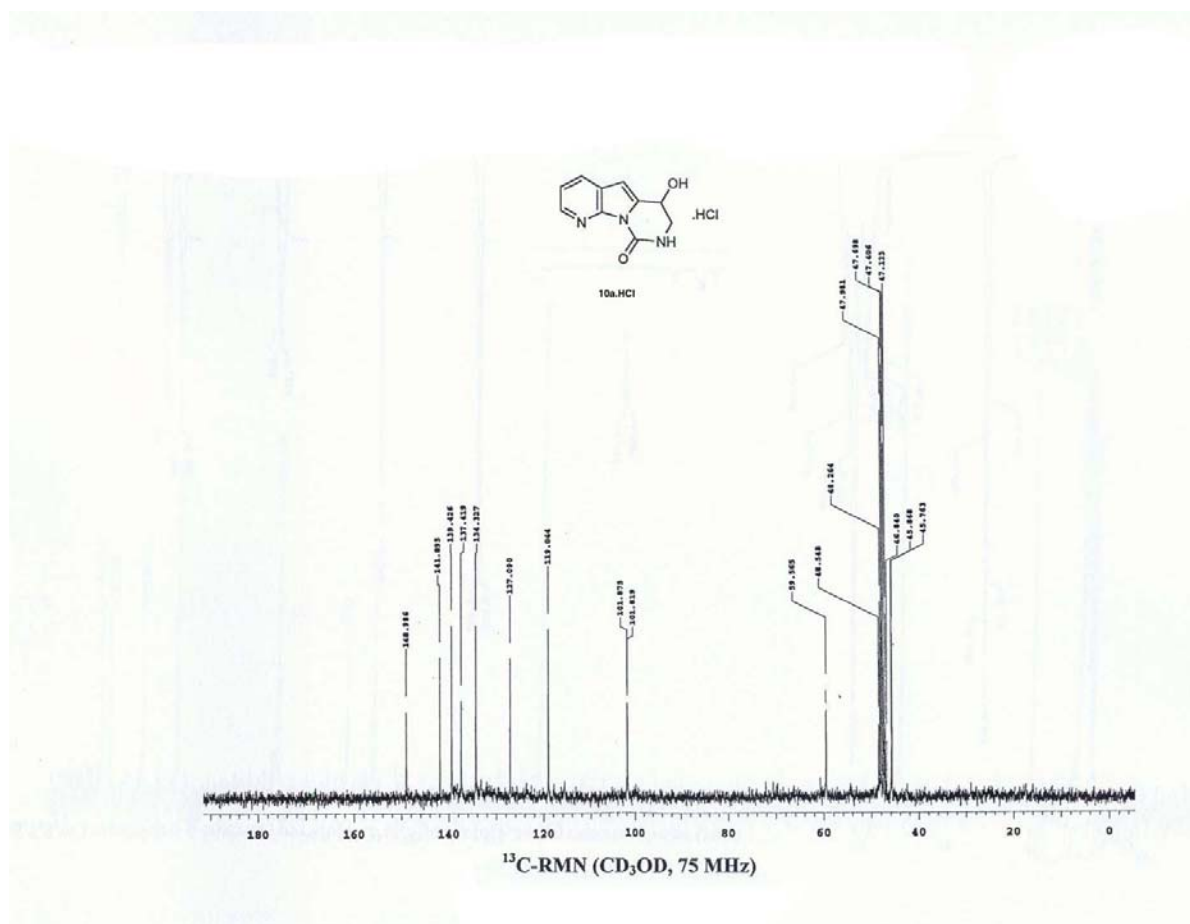

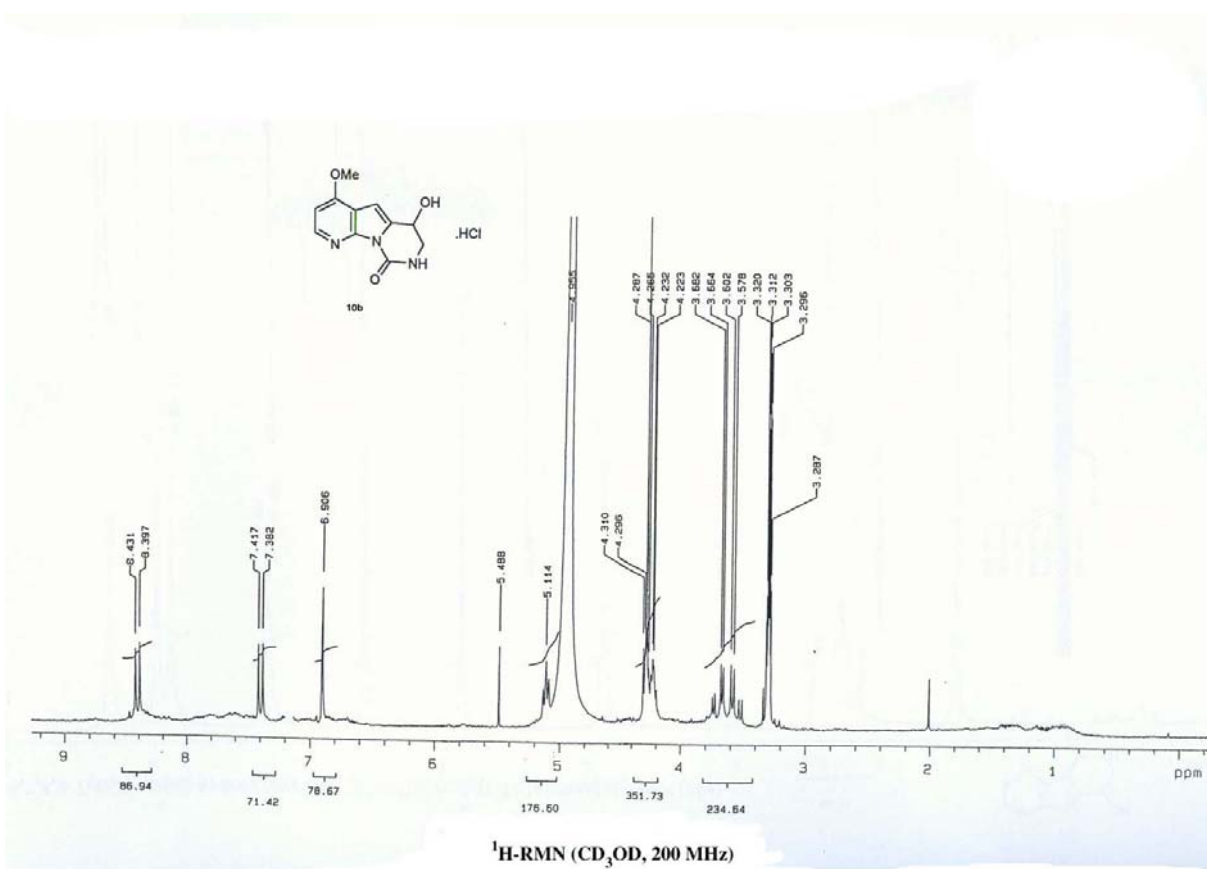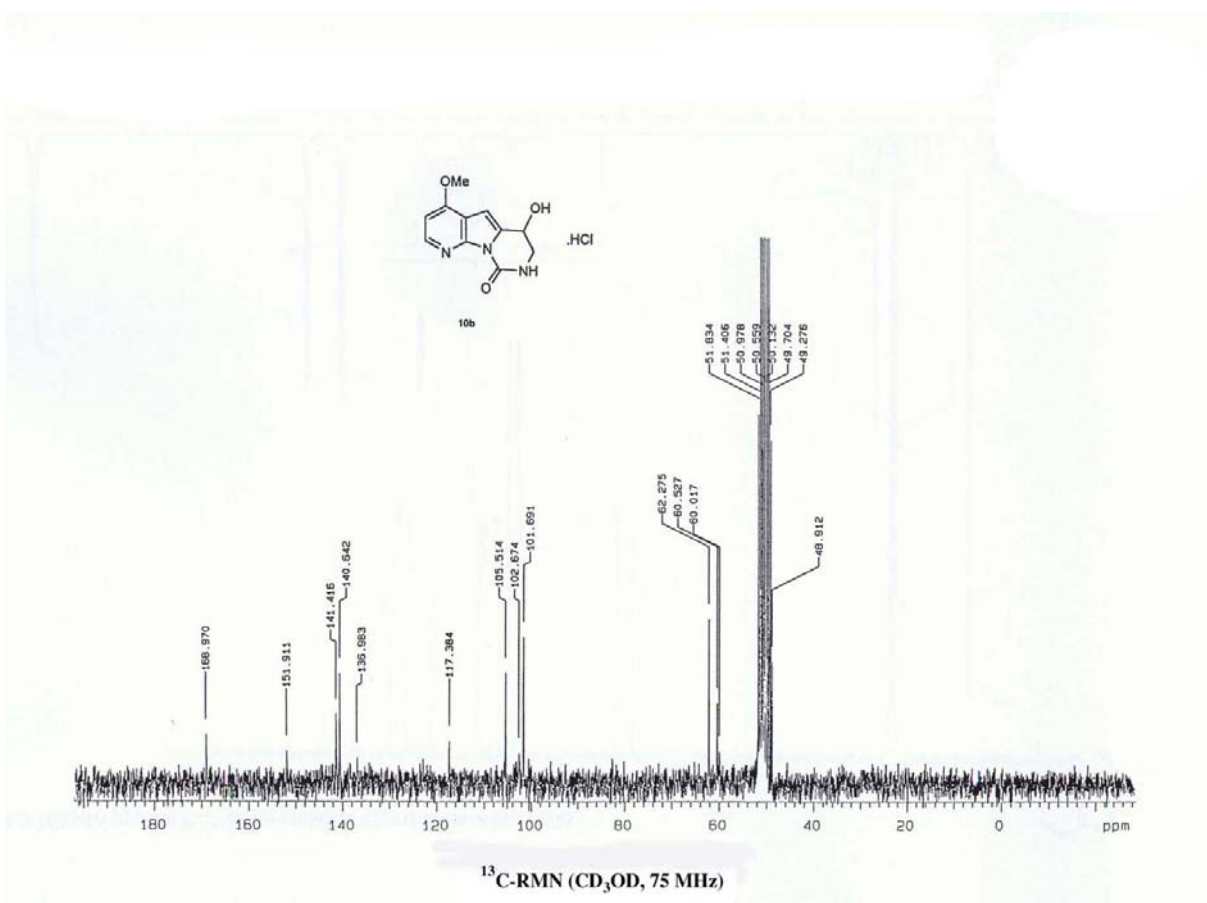



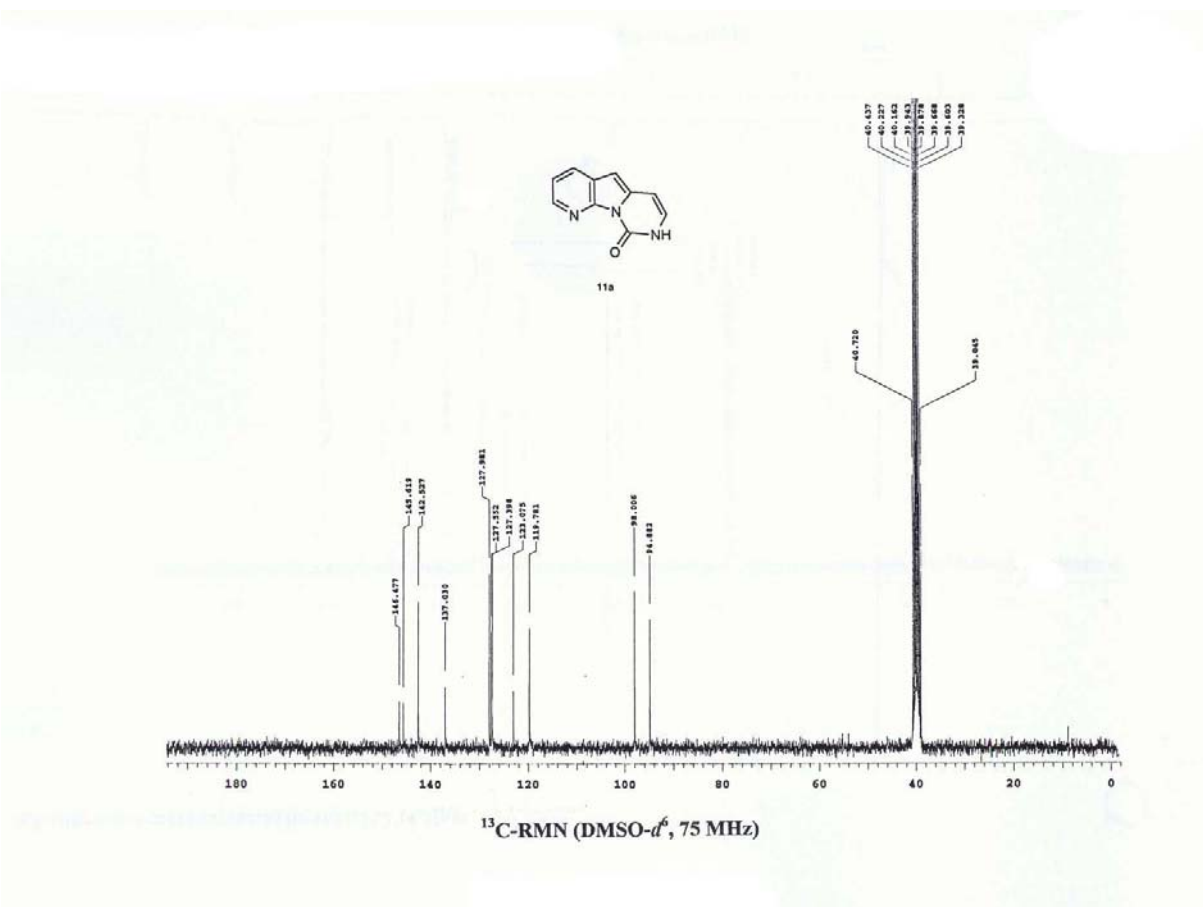

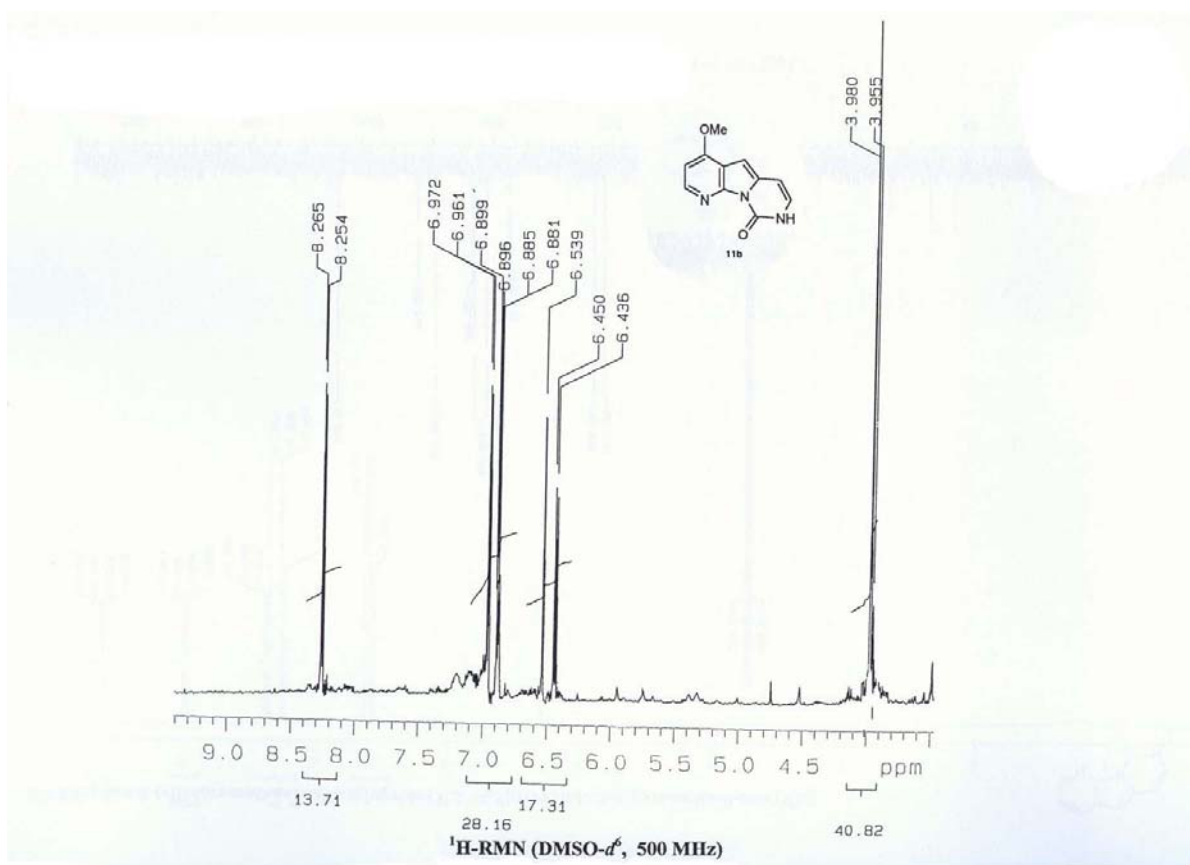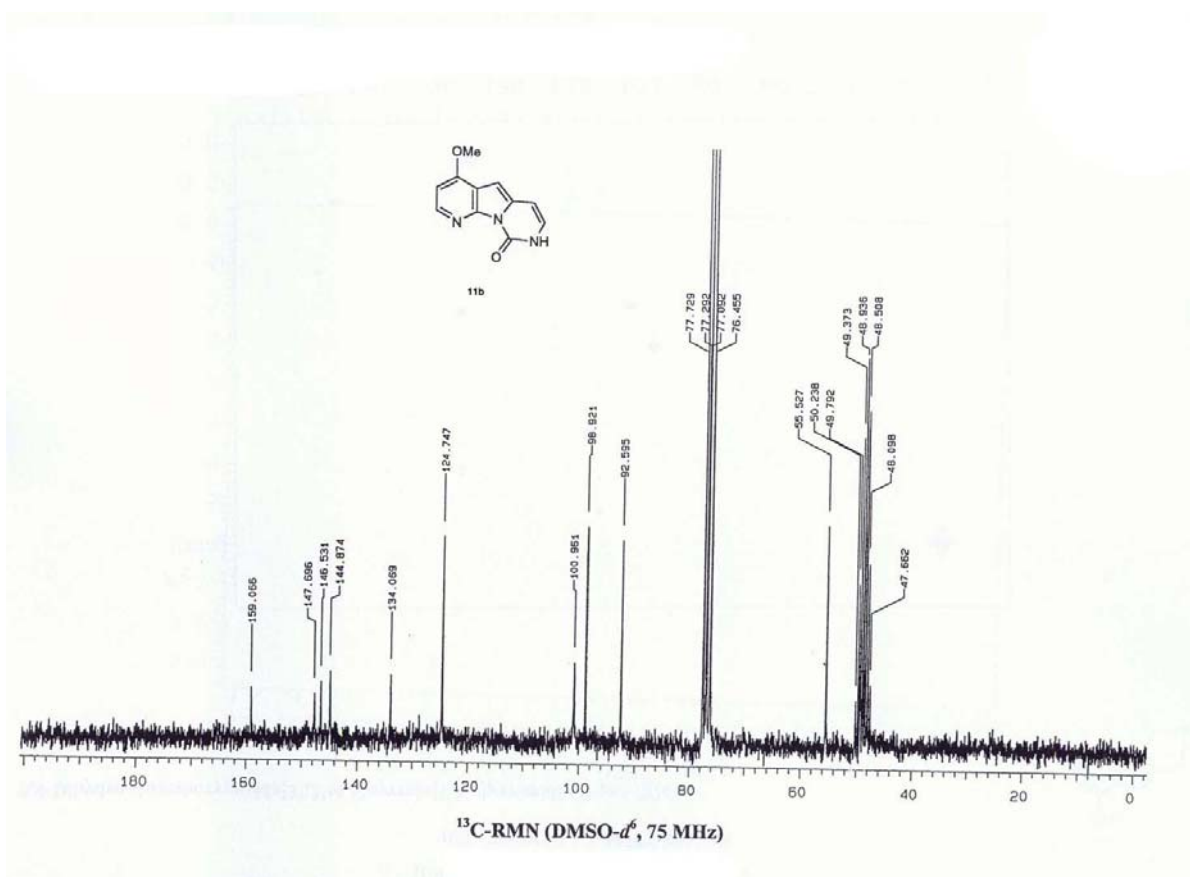

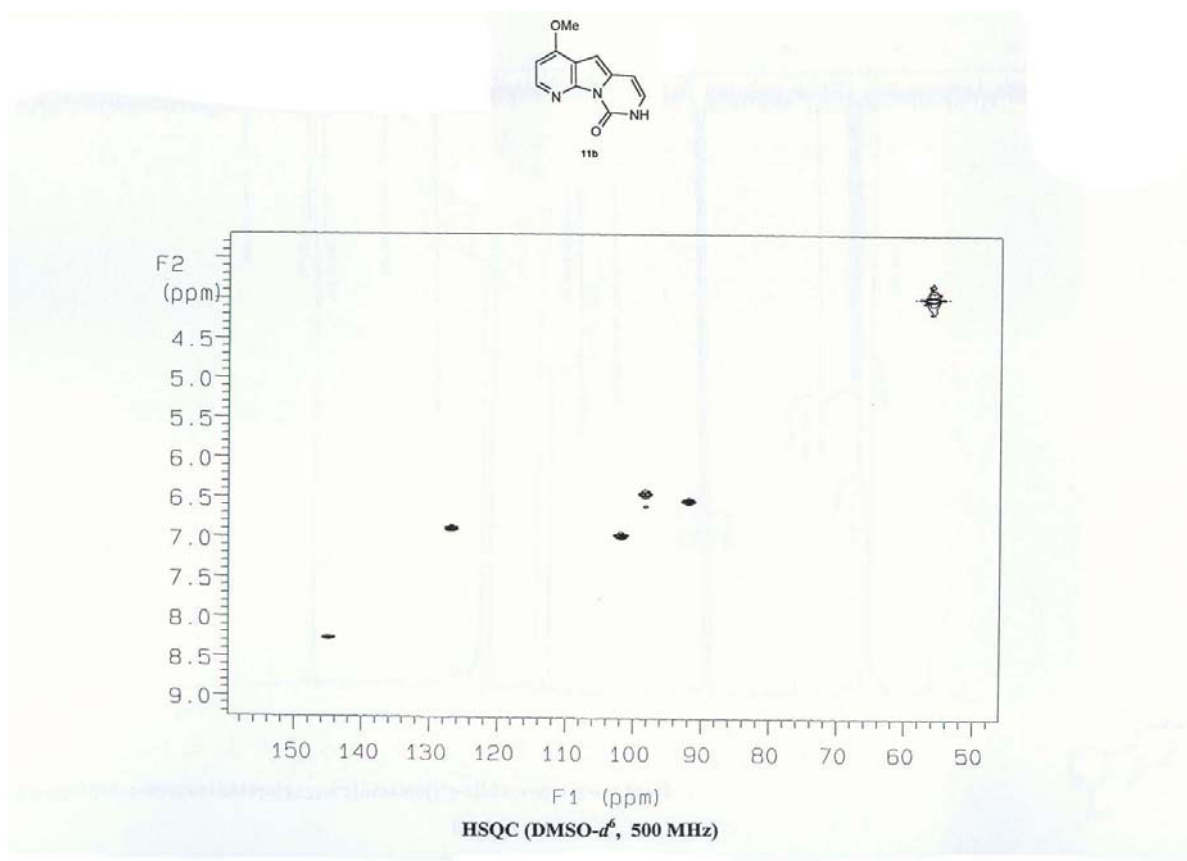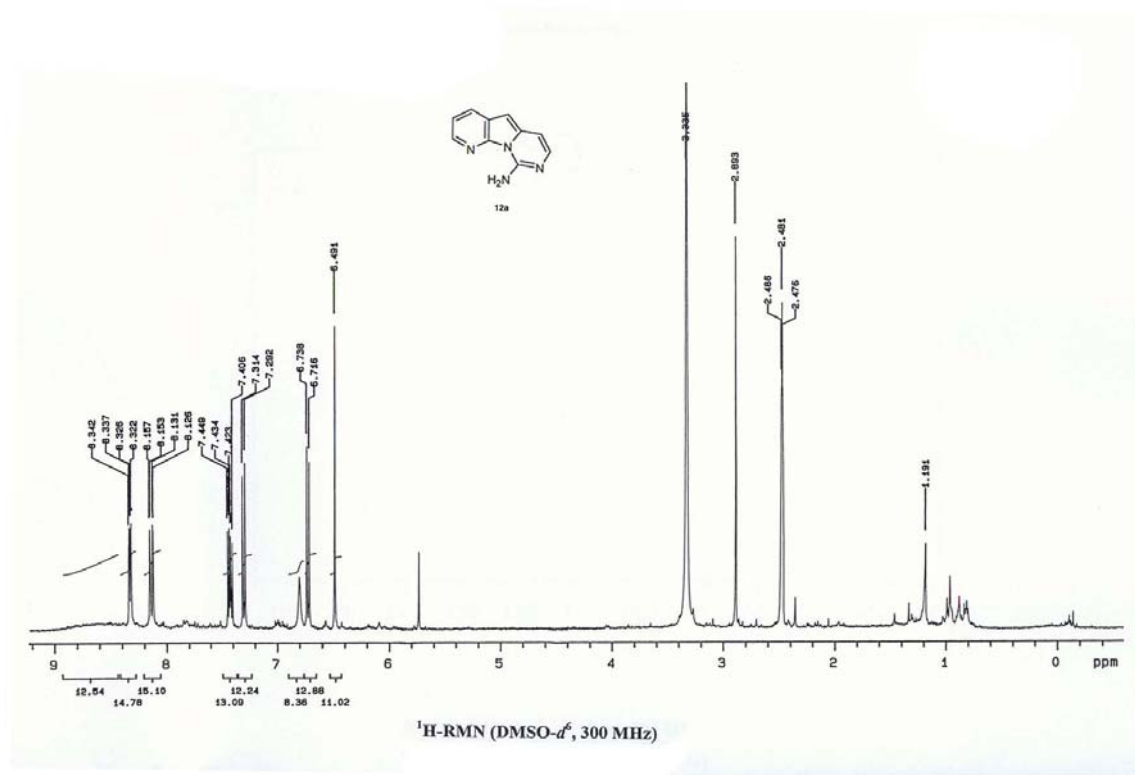

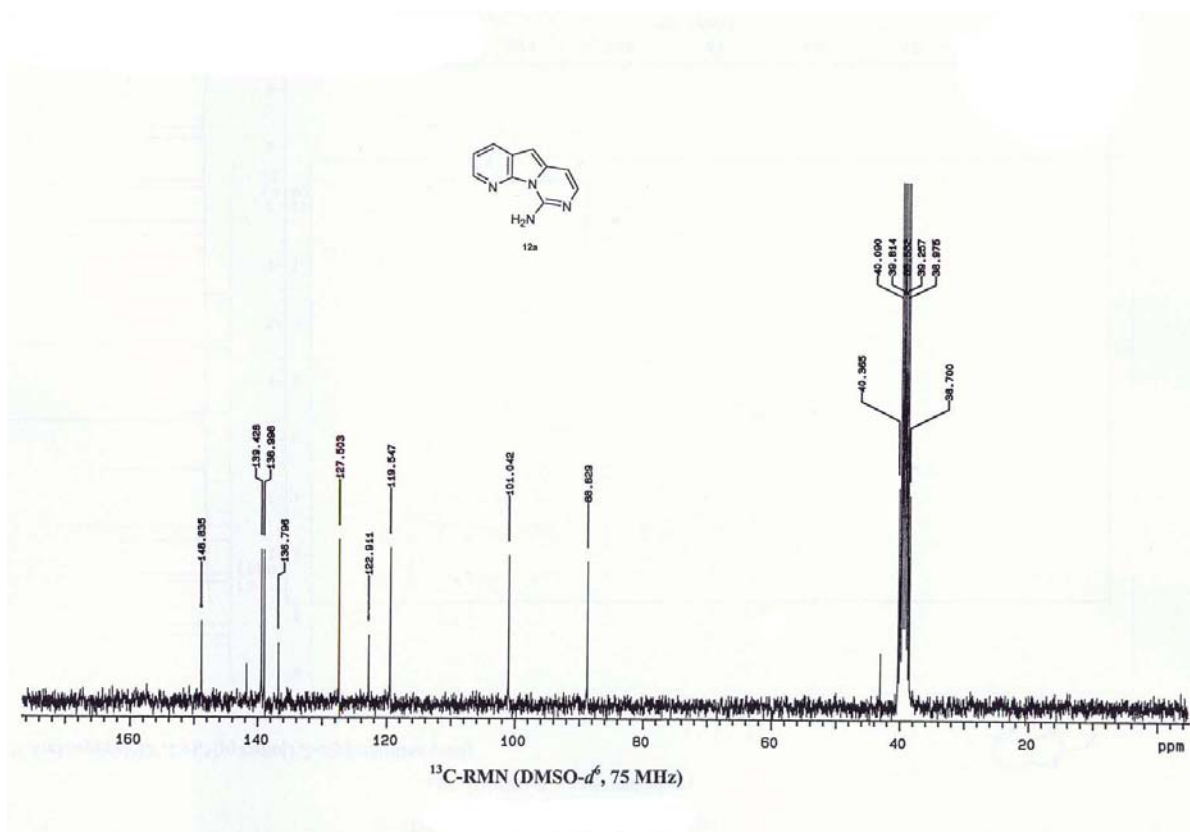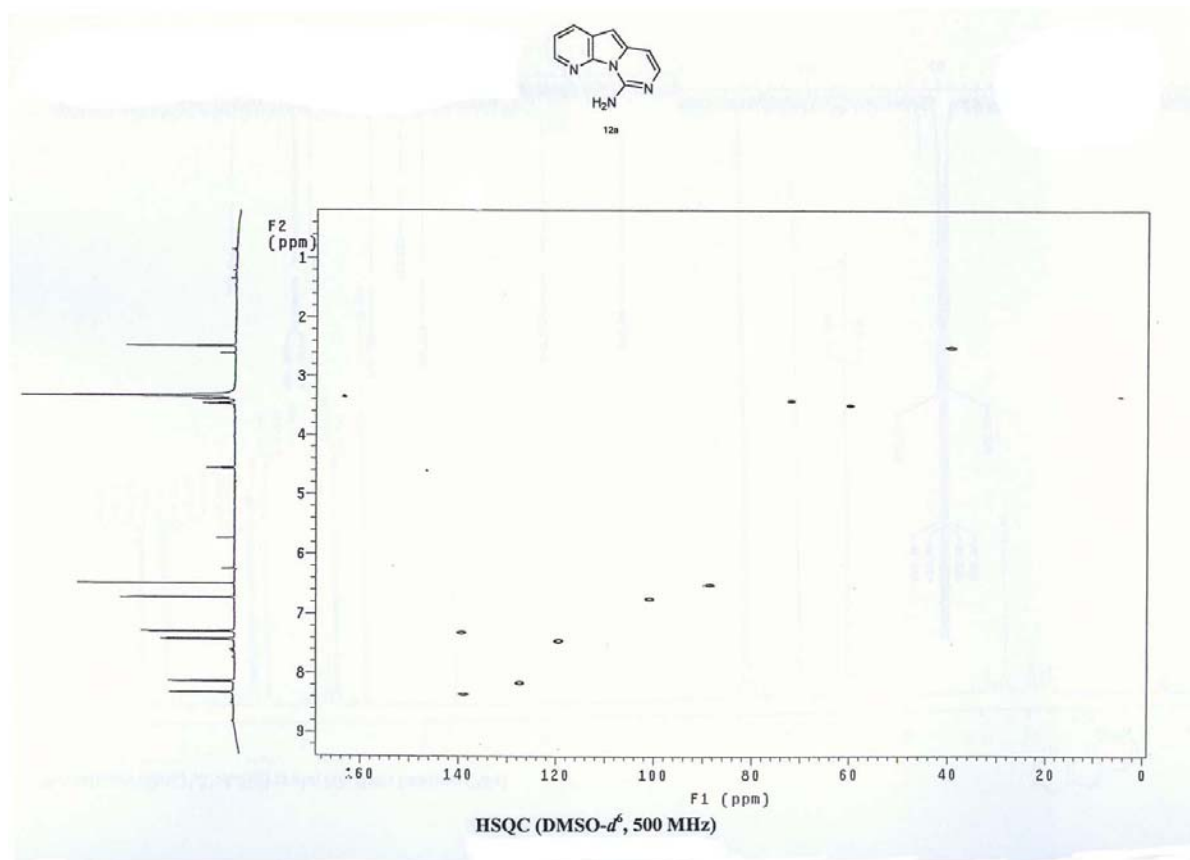

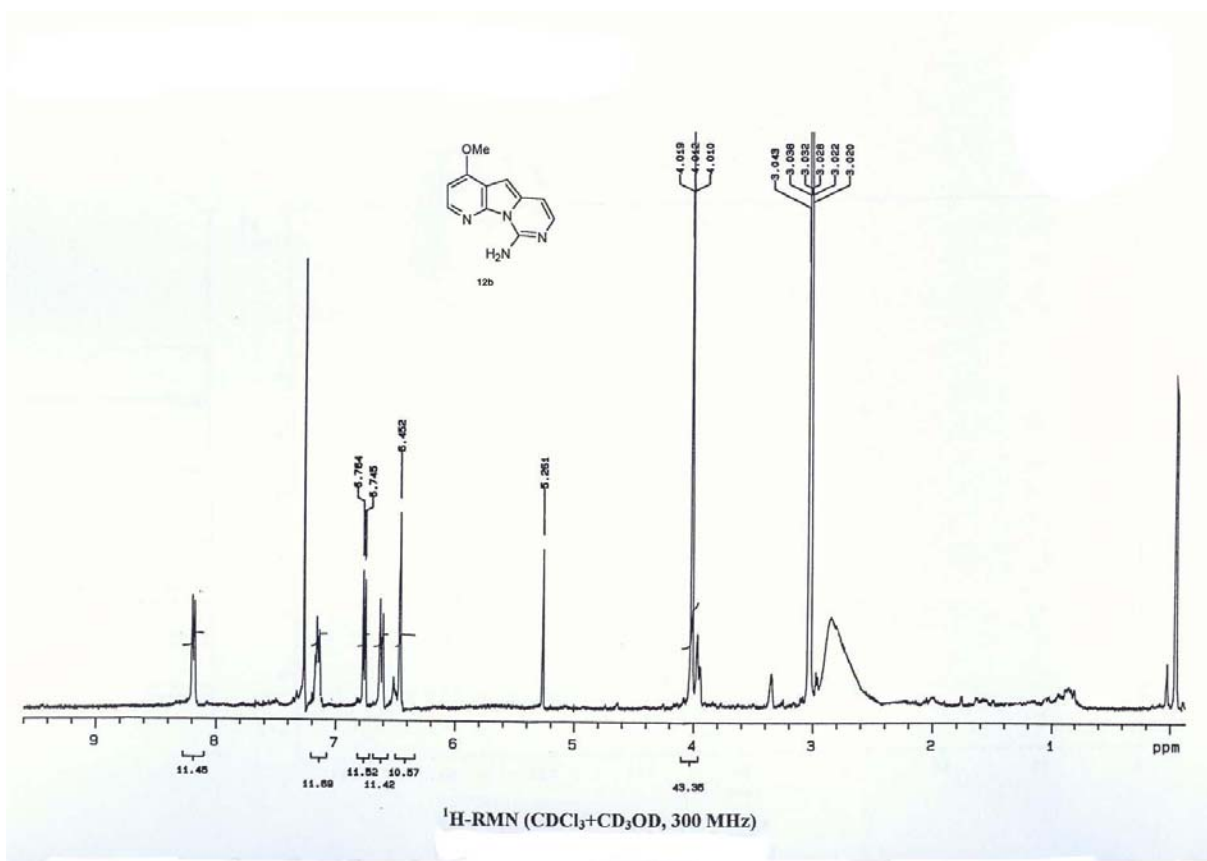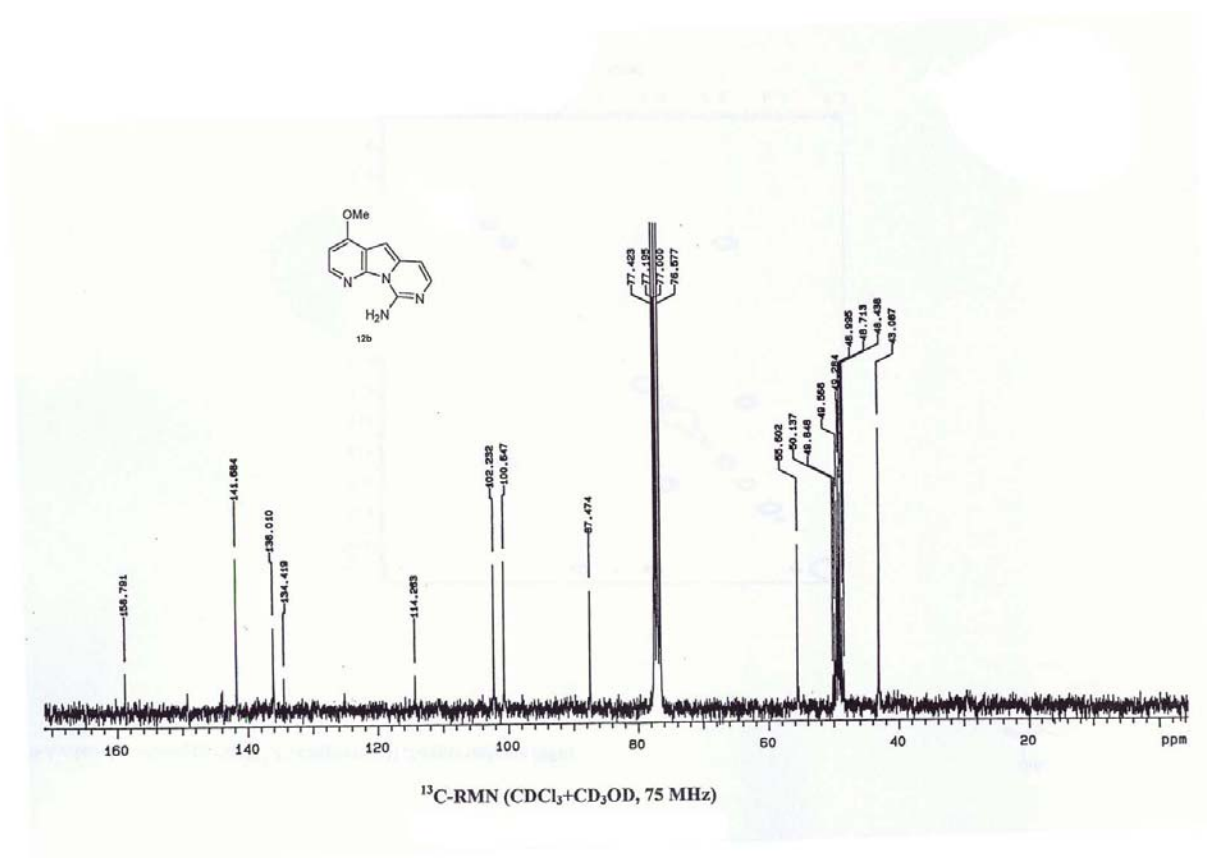

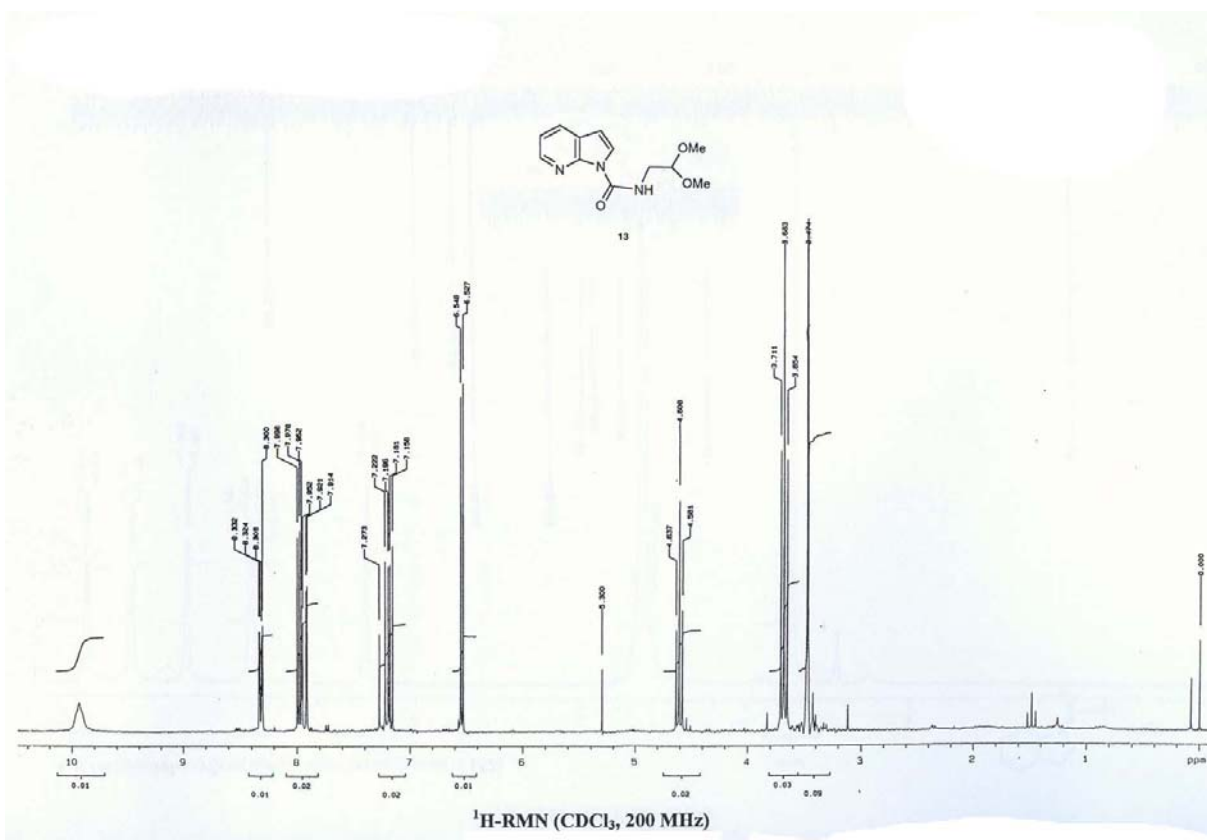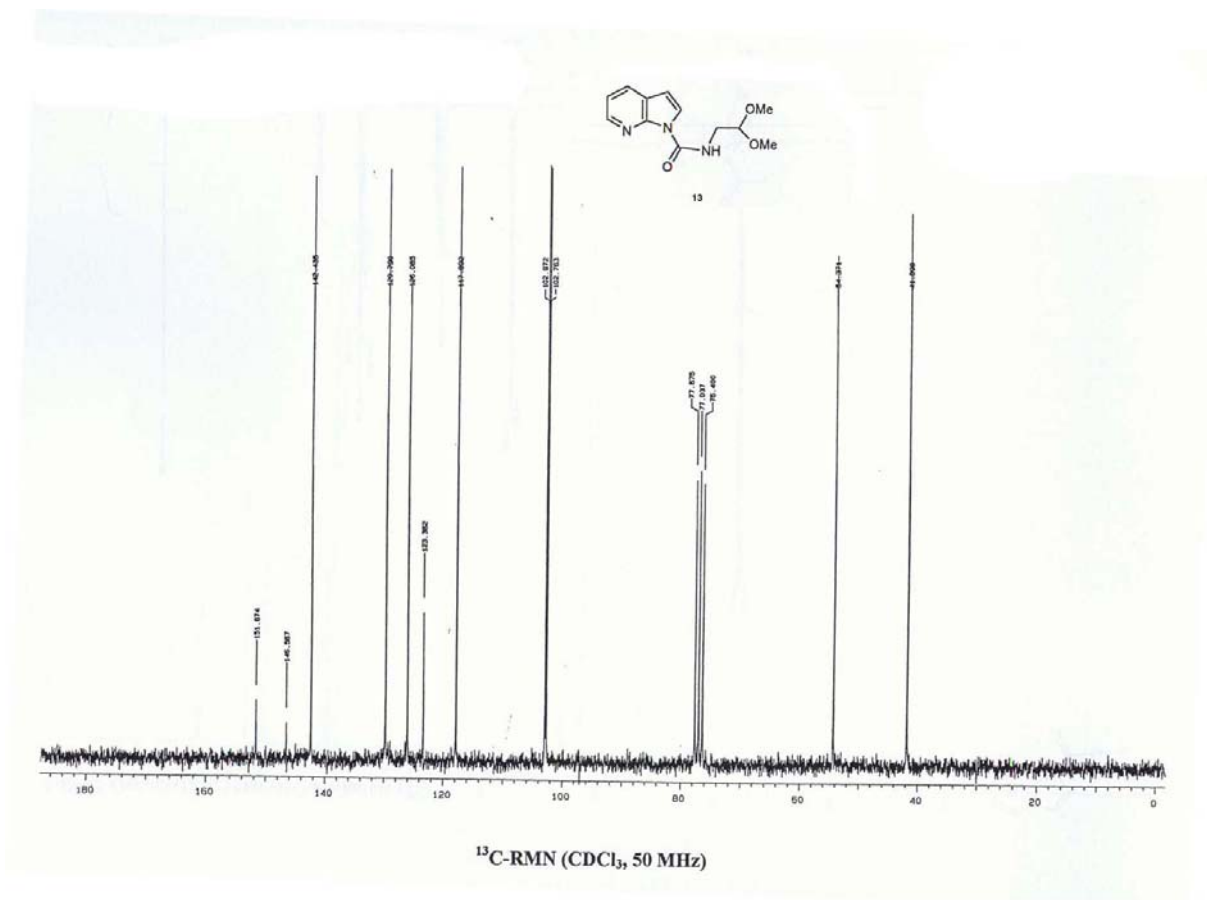

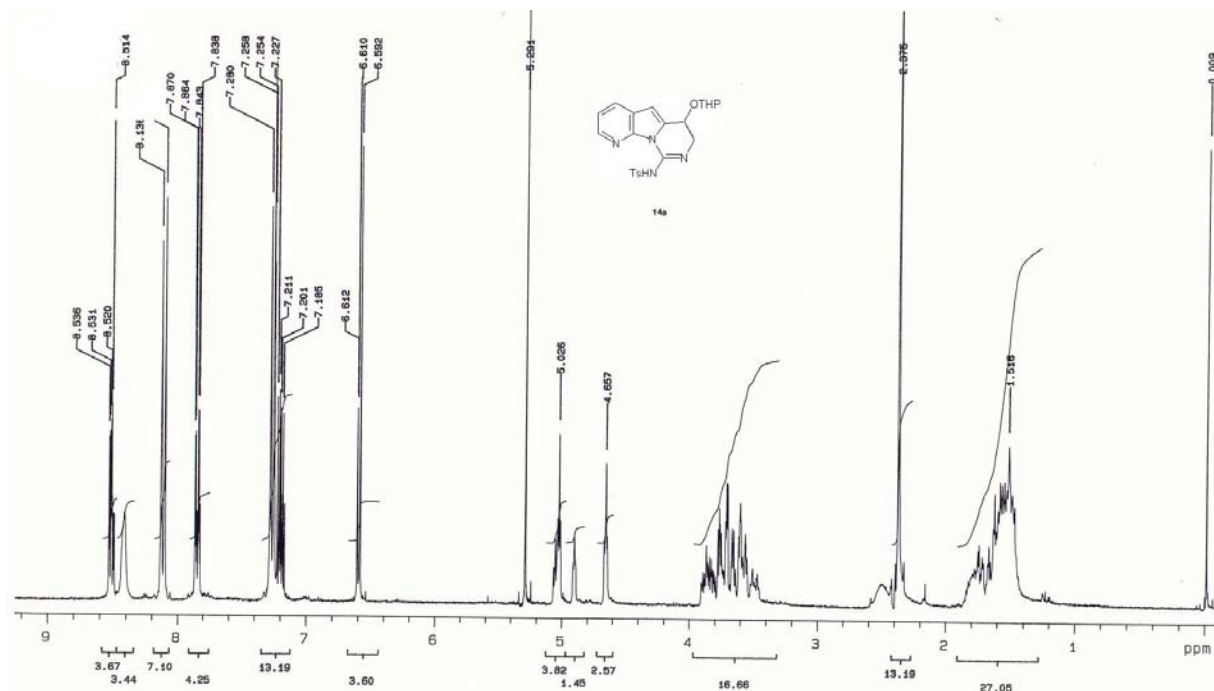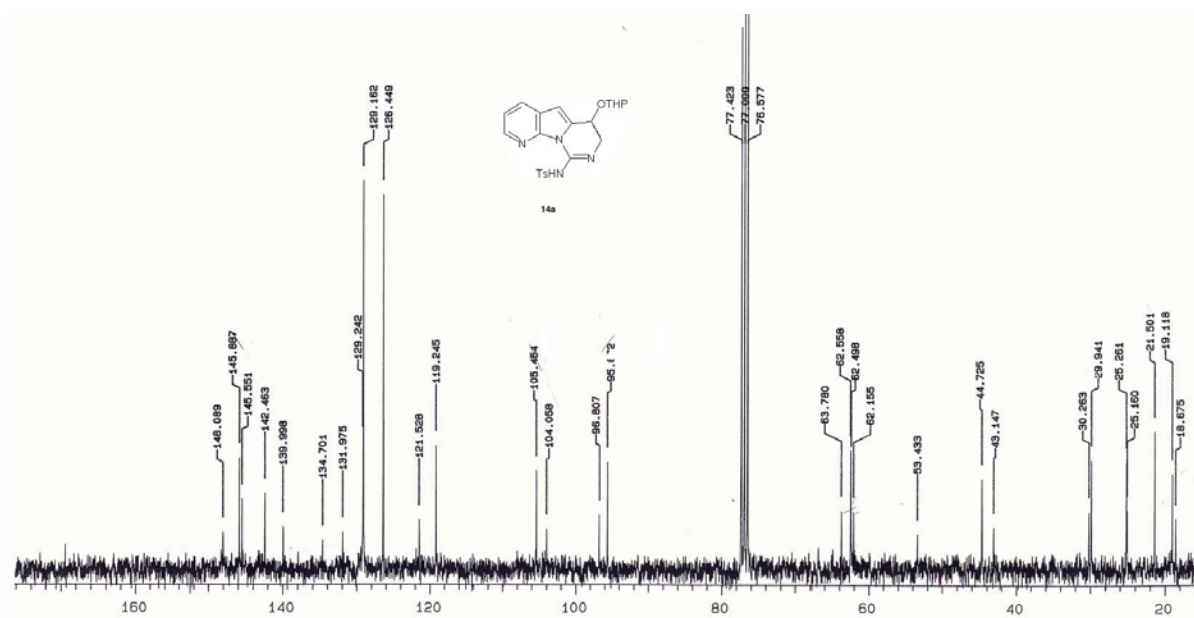



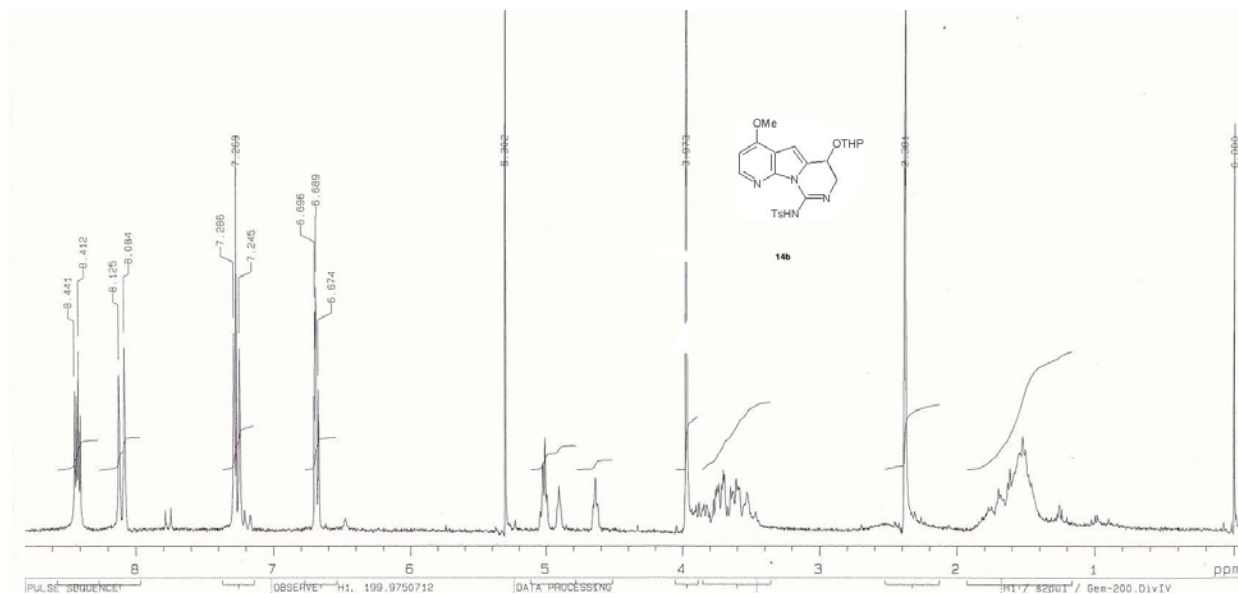

<sup>1</sup>H-RMN (CDCl<sub>3</sub>, 200 MHz)

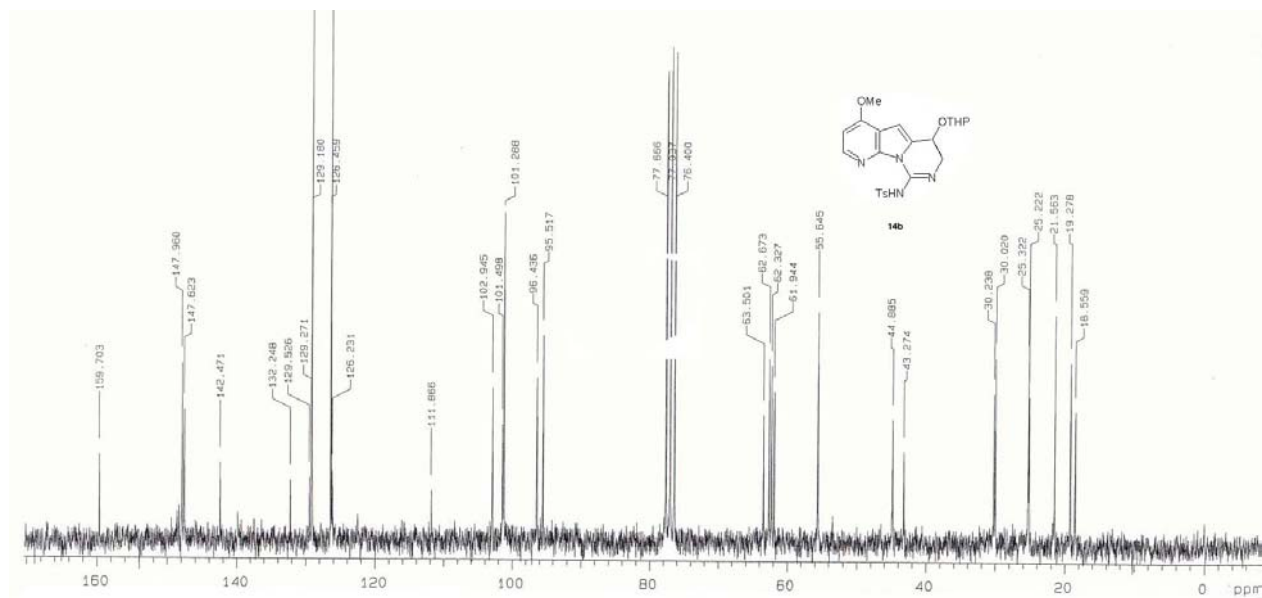

<sup>13</sup>C-RMN (CDCl<sub>3</sub>, 75 MHz)

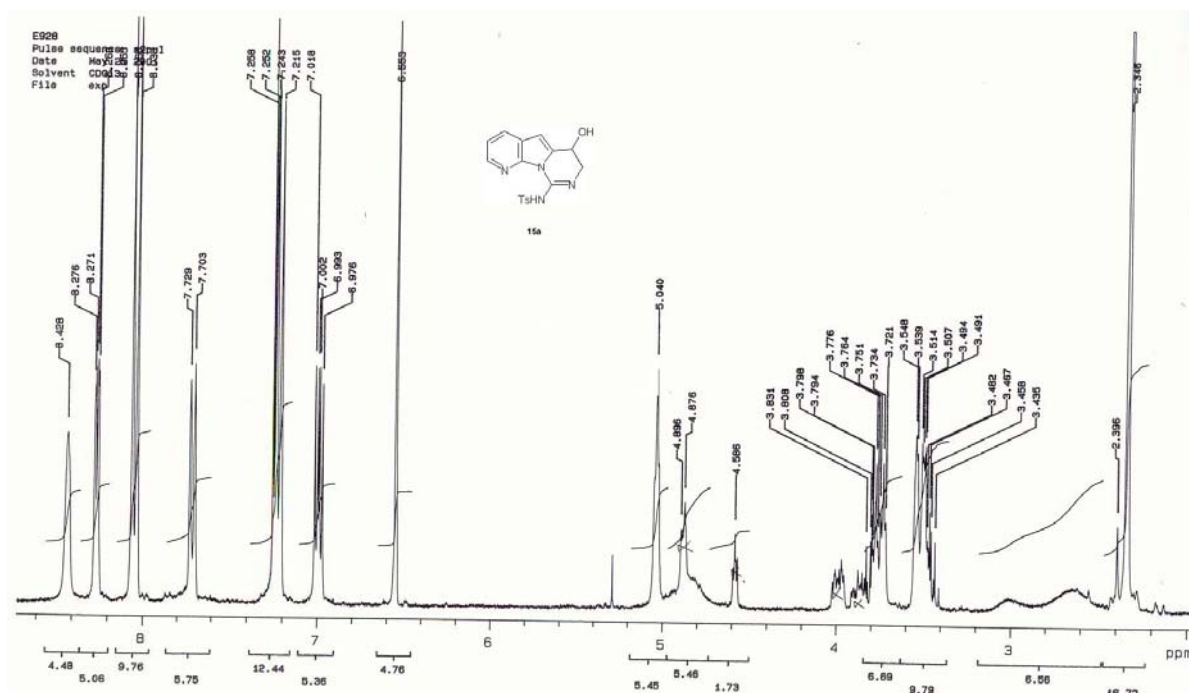

<sup>1</sup>H-RMN (CD<sub>3</sub>OD, 300 MHz)

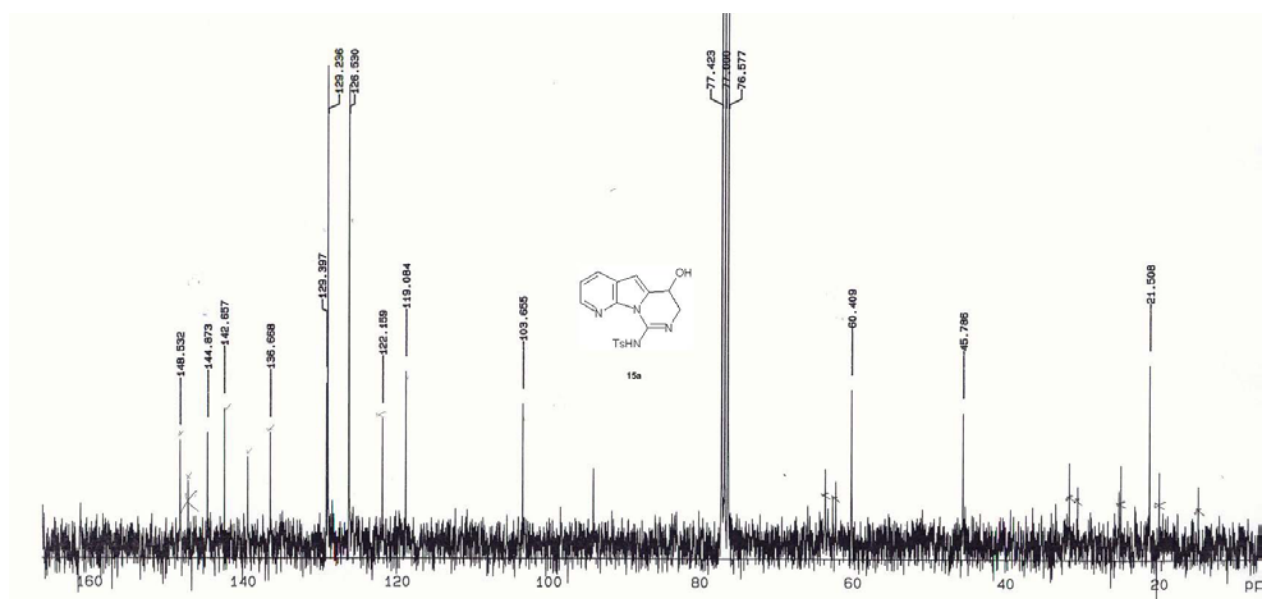

<sup>13</sup>C-RMN (CDCl<sub>3</sub>, 75 MHz)

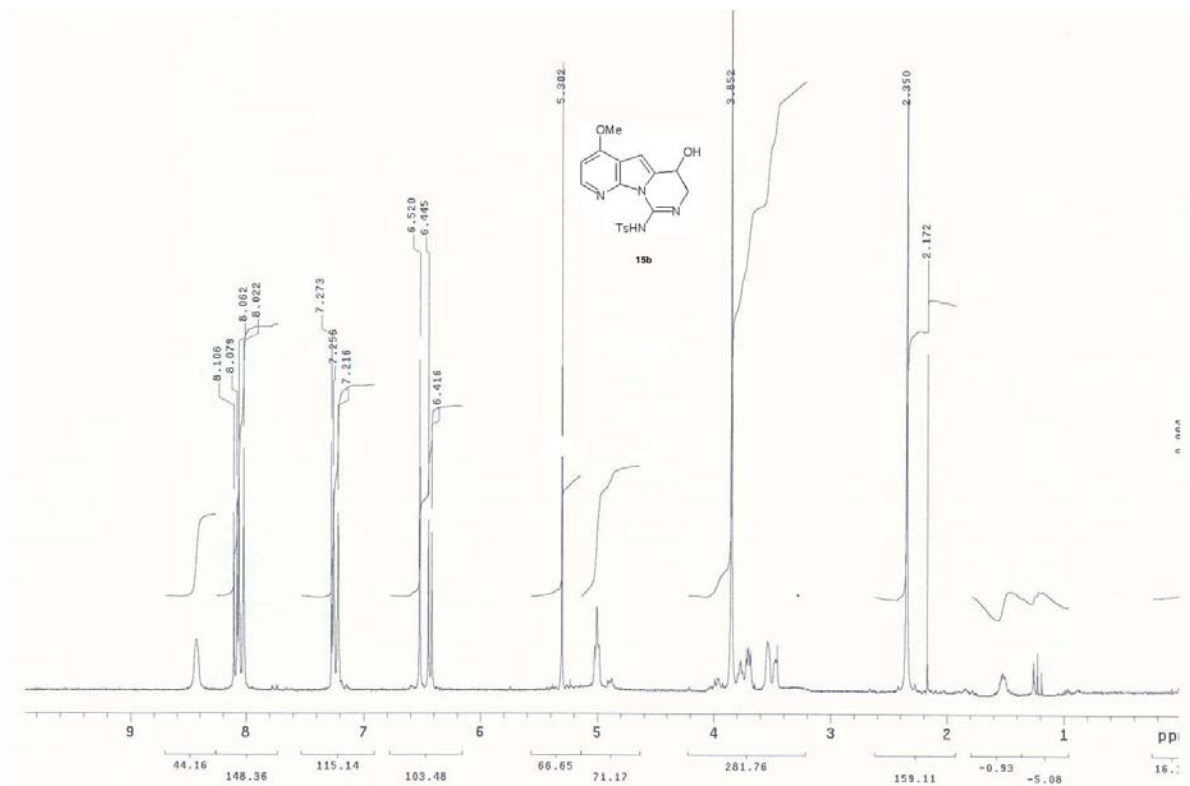

<sup>1</sup>H-RMN (CDCl<sub>3</sub>, 200 MHz)

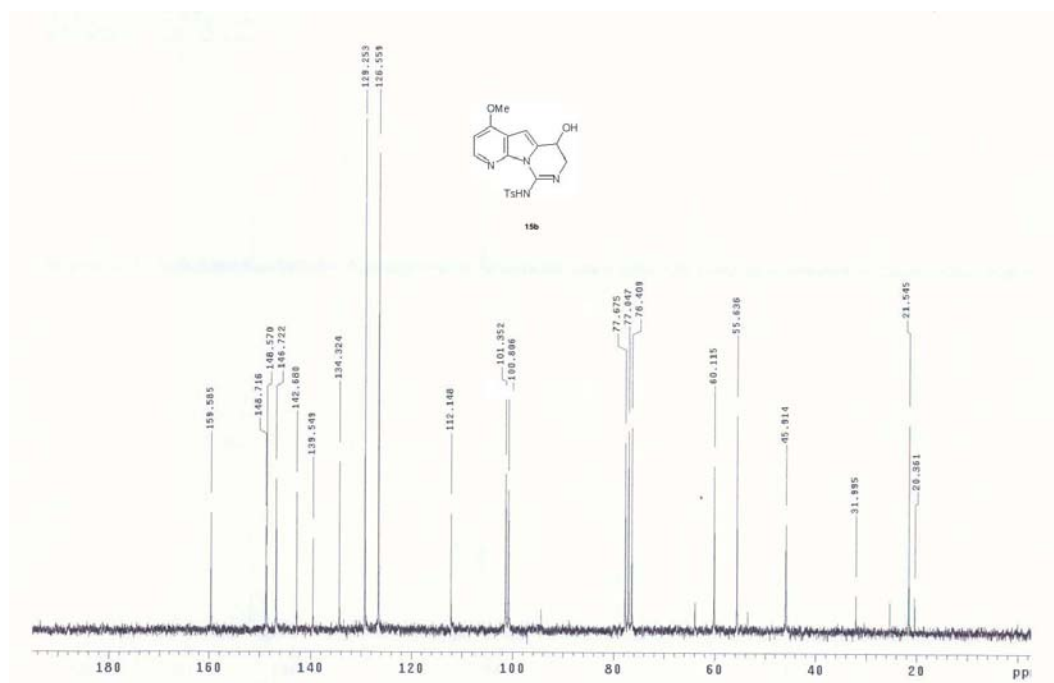

<sup>13</sup>C-RMN (CDCl<sub>3</sub>, 75 MHz)

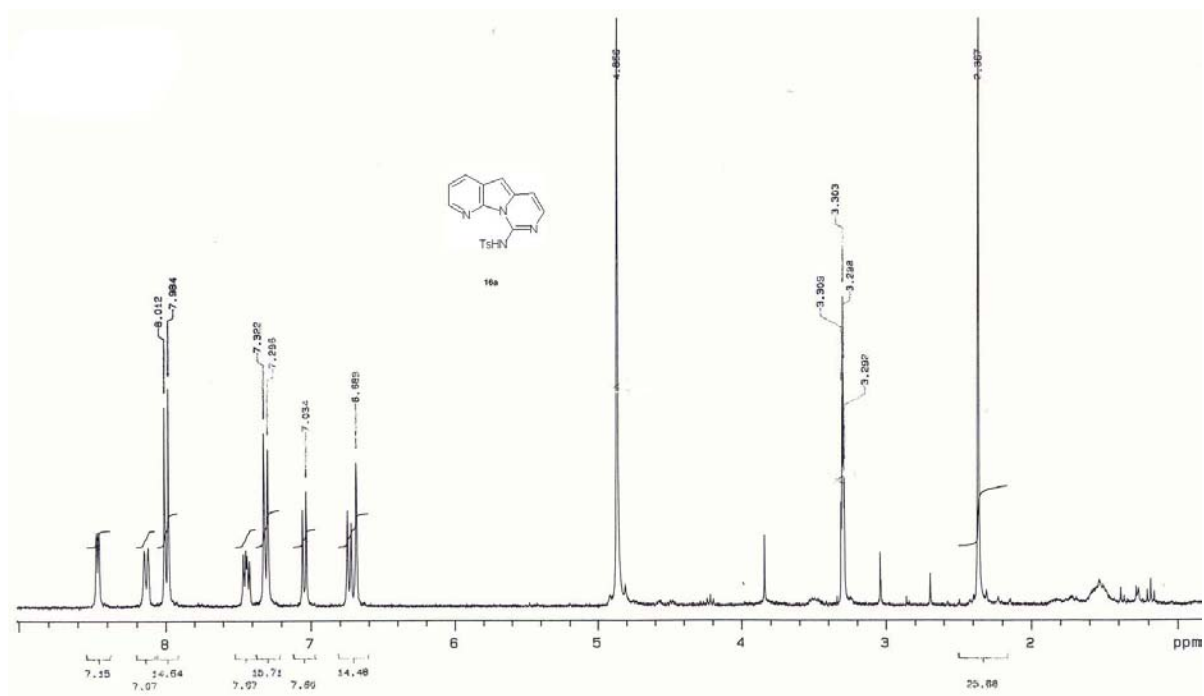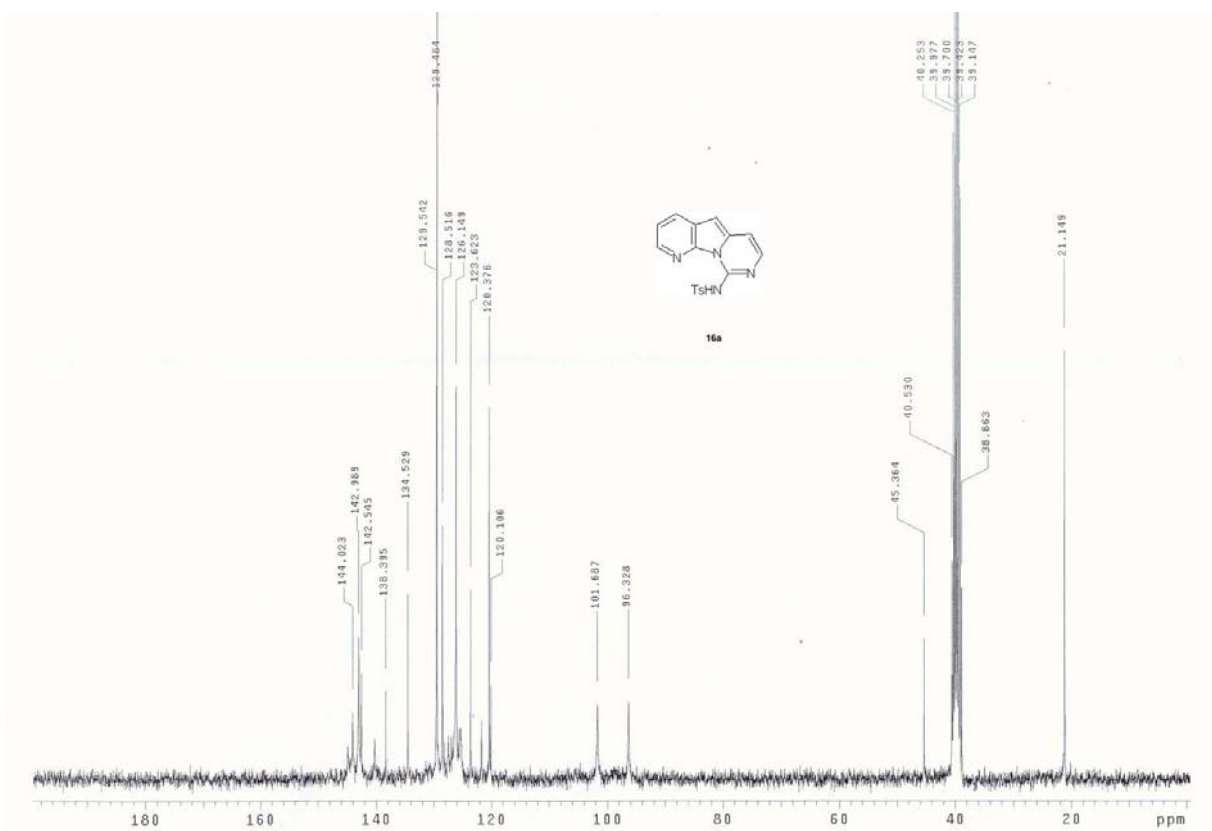

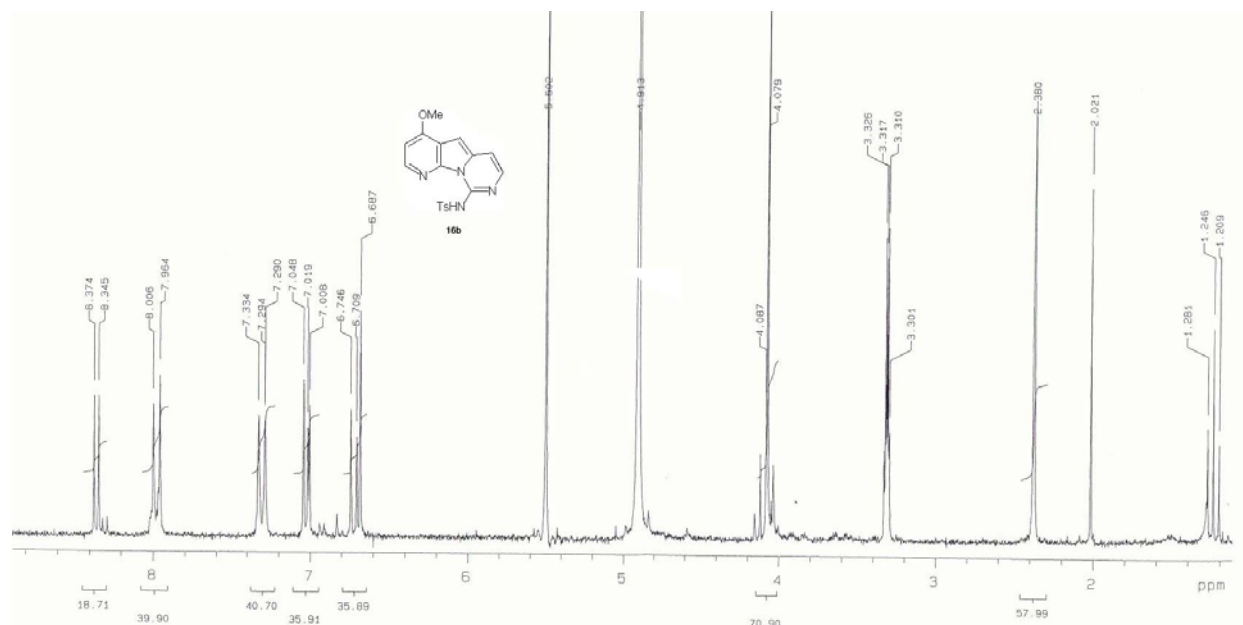

<sup>1</sup>H-RMN (DMSO-d<sub>6</sub>, 200 MHz)

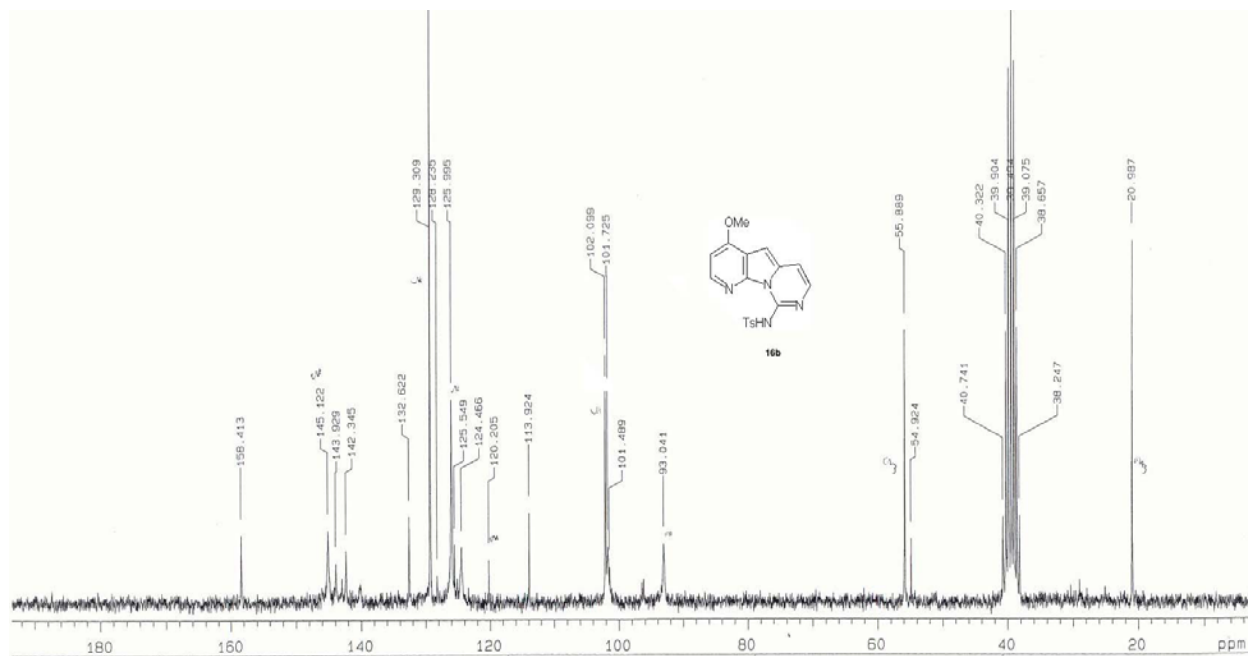

<sup>13</sup>C-RMN (DMSO-d<sub>6</sub>, 75 MHz)

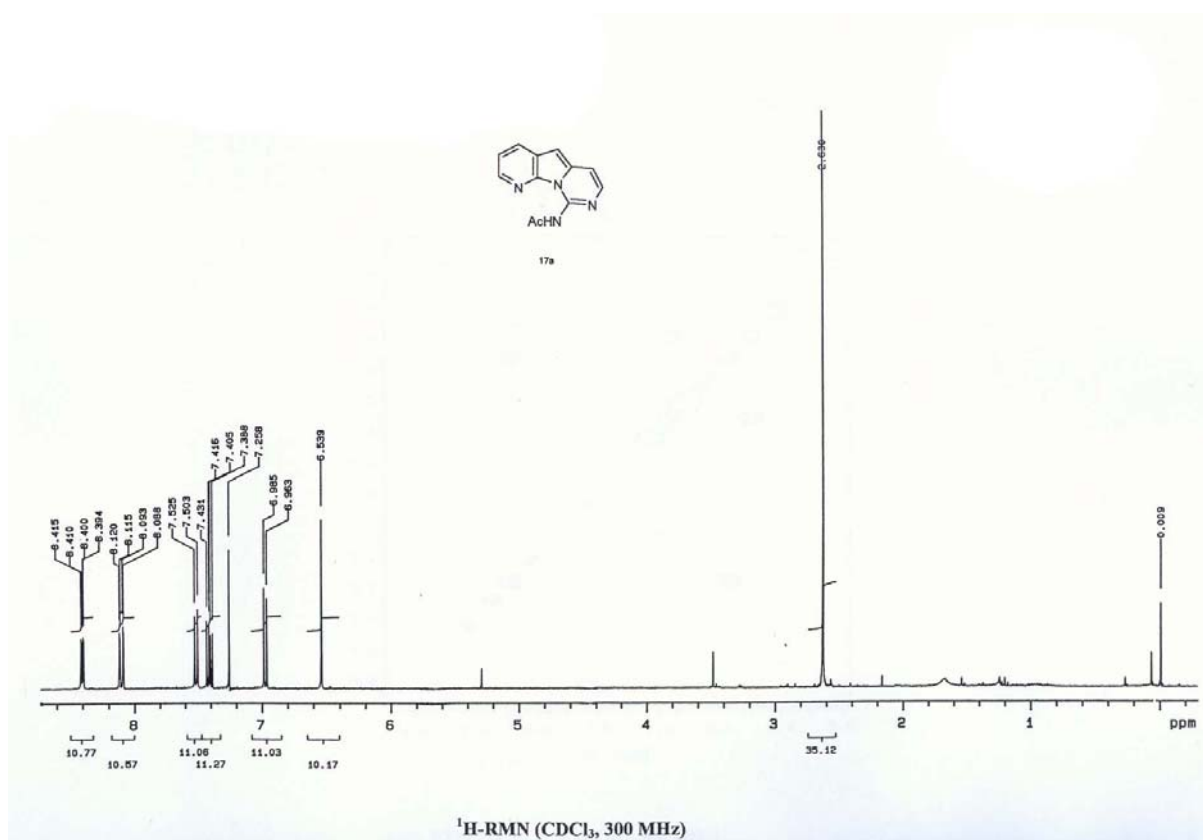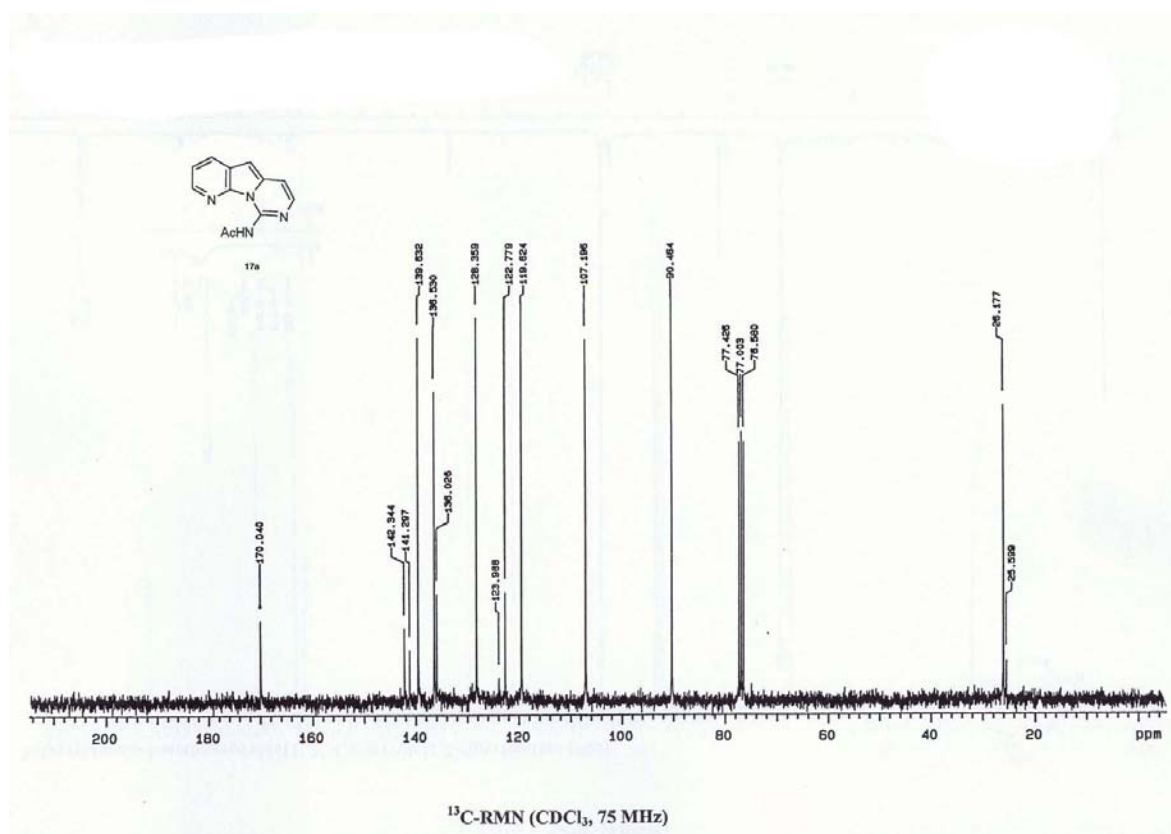





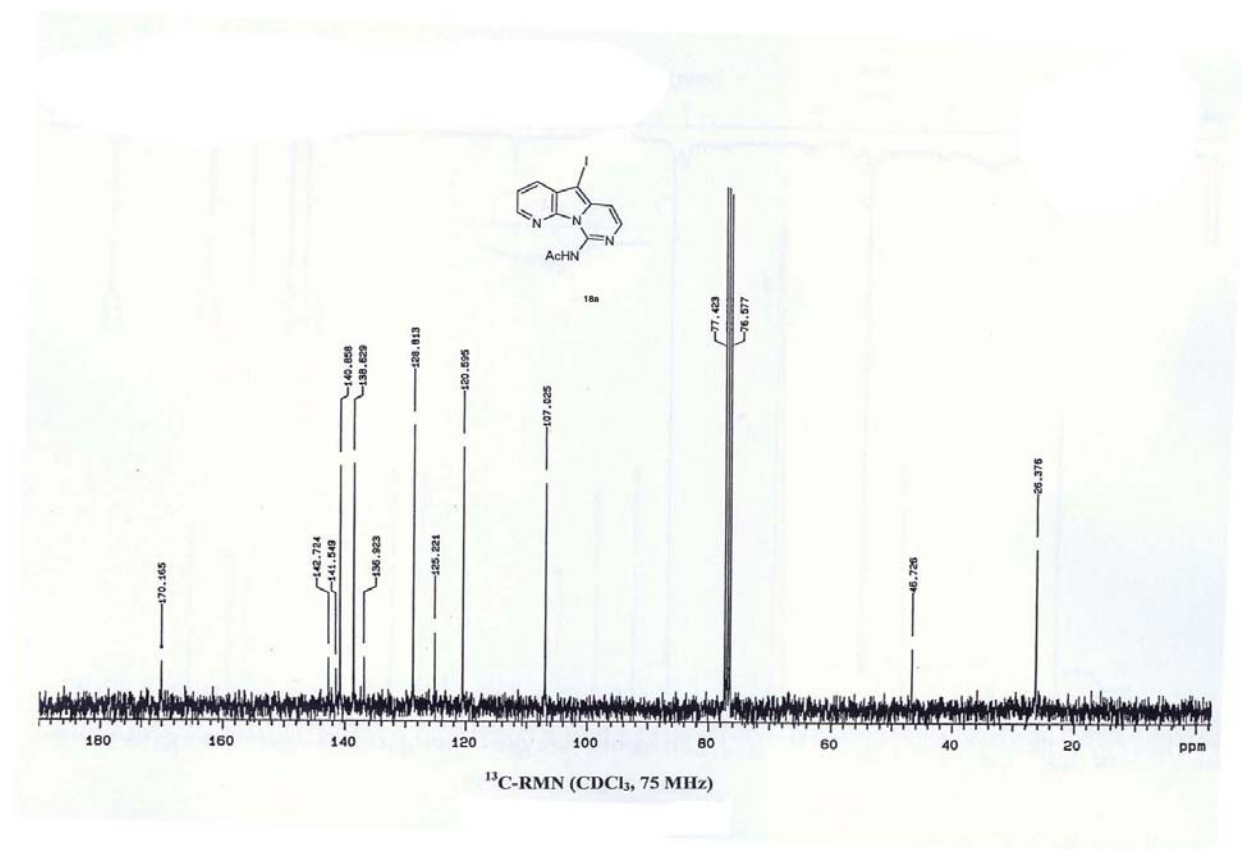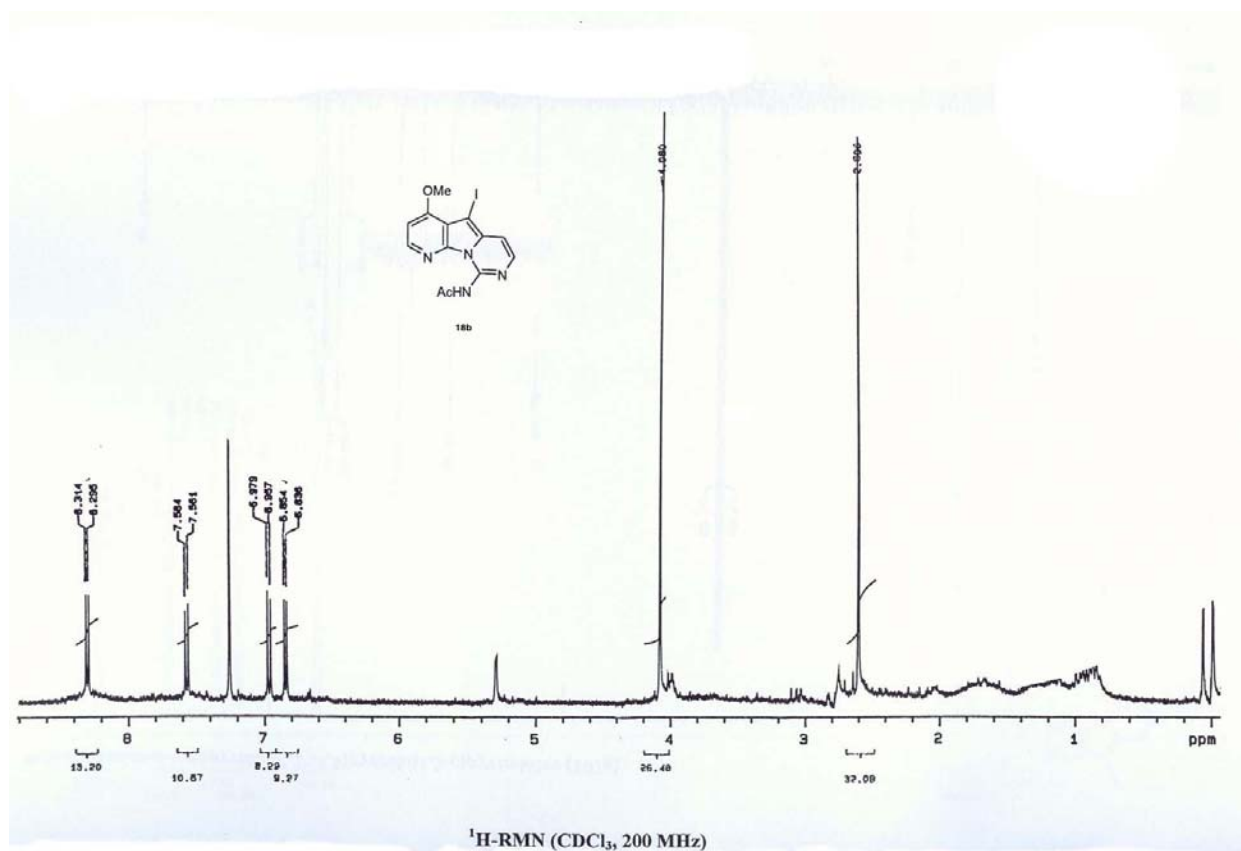

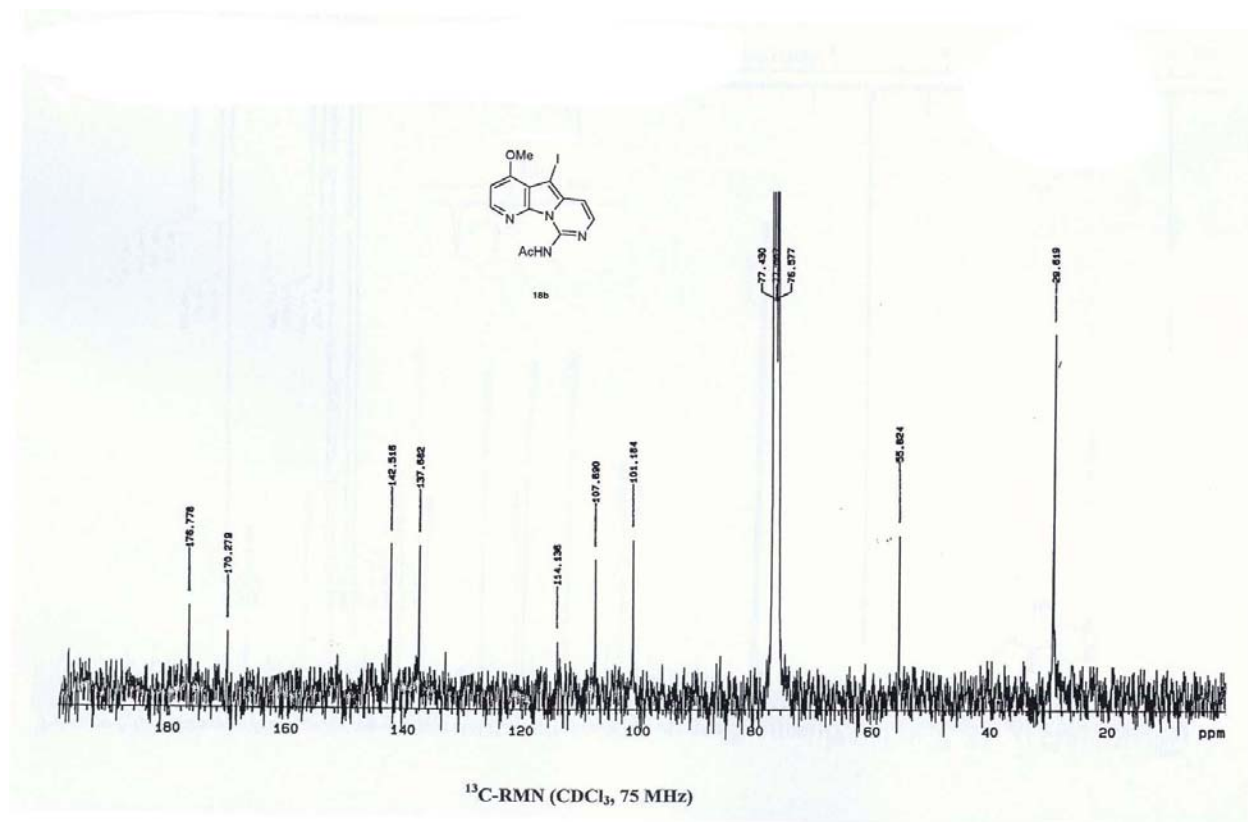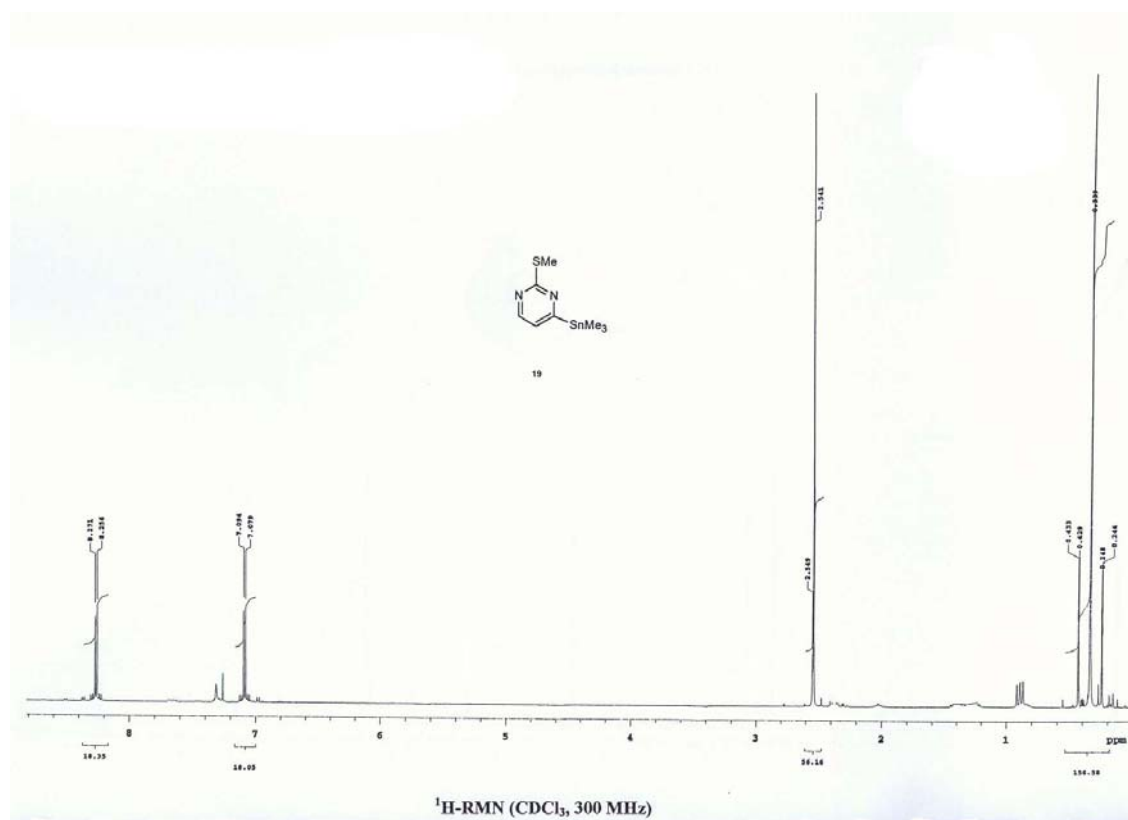

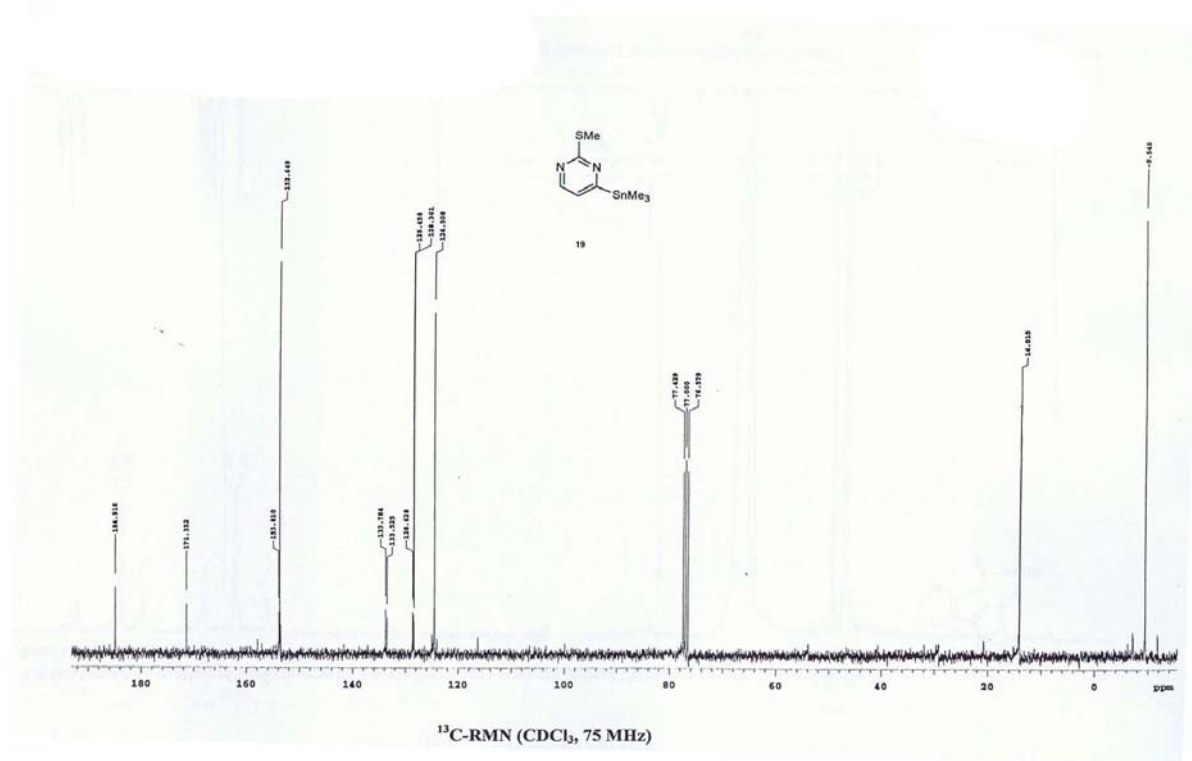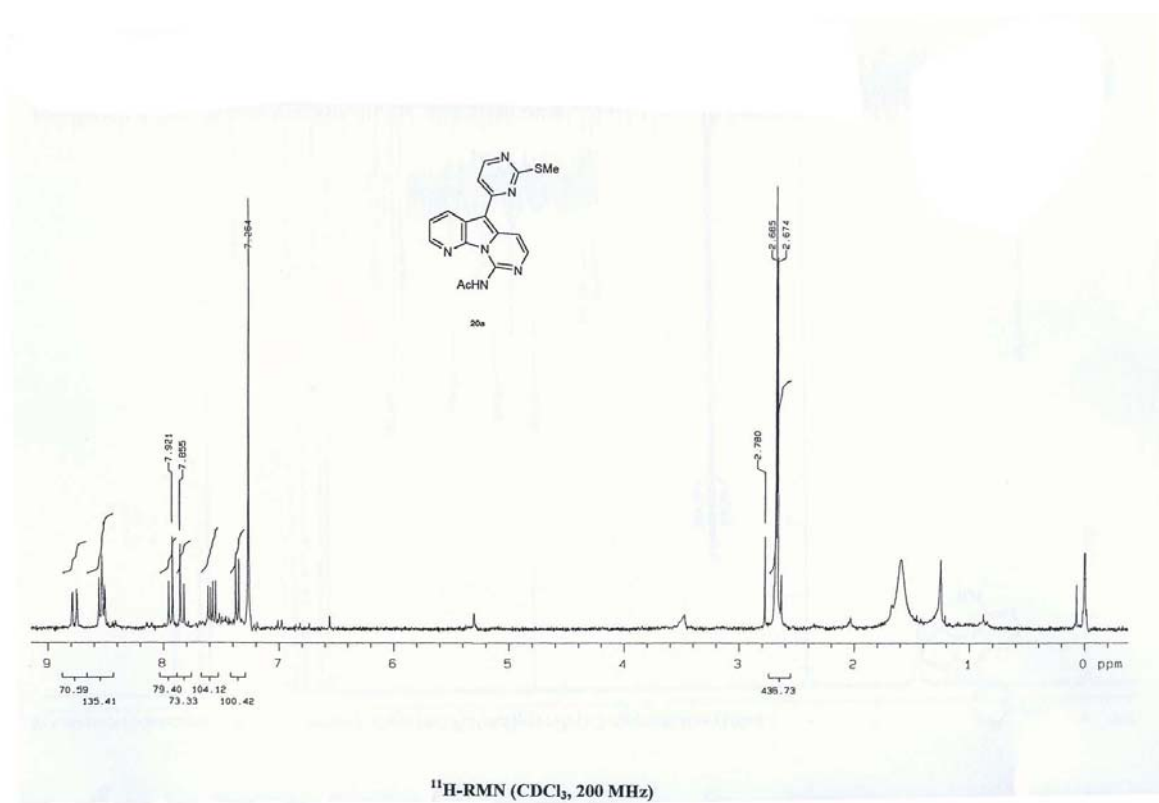

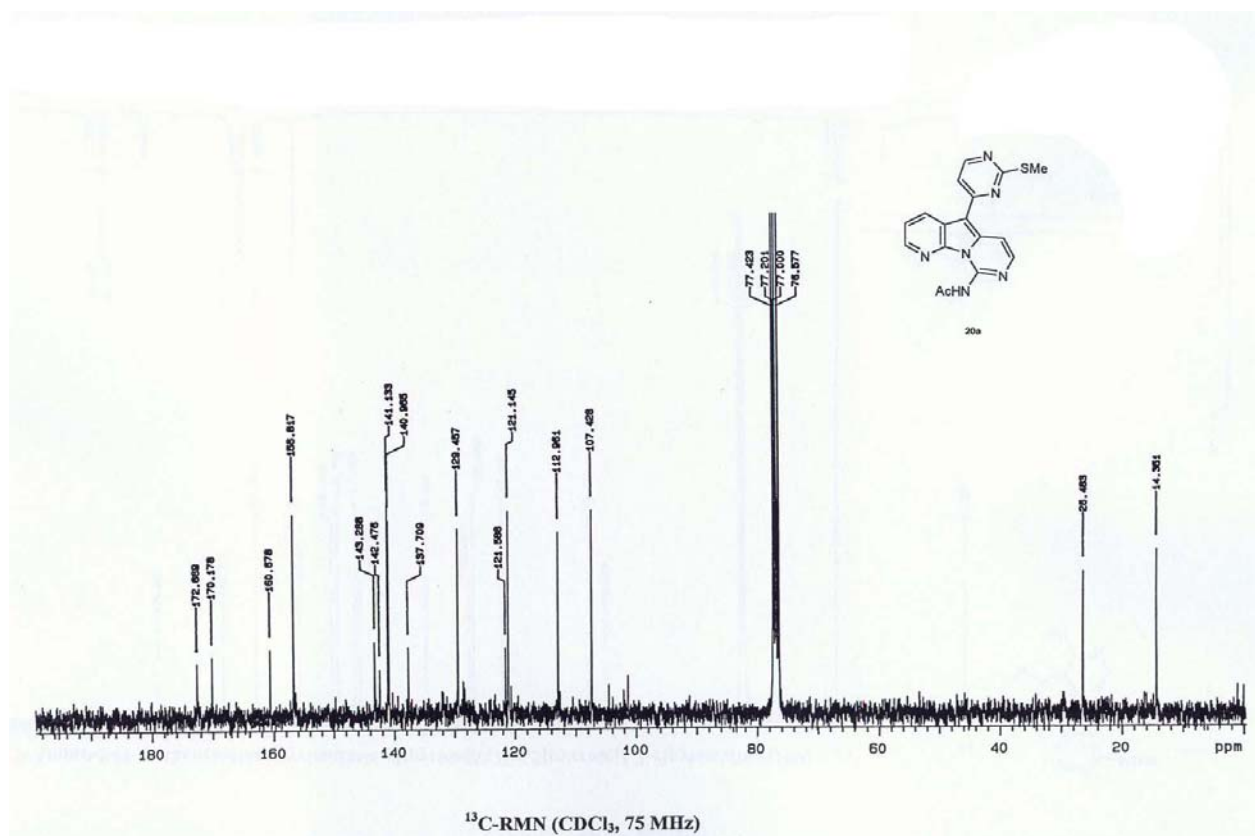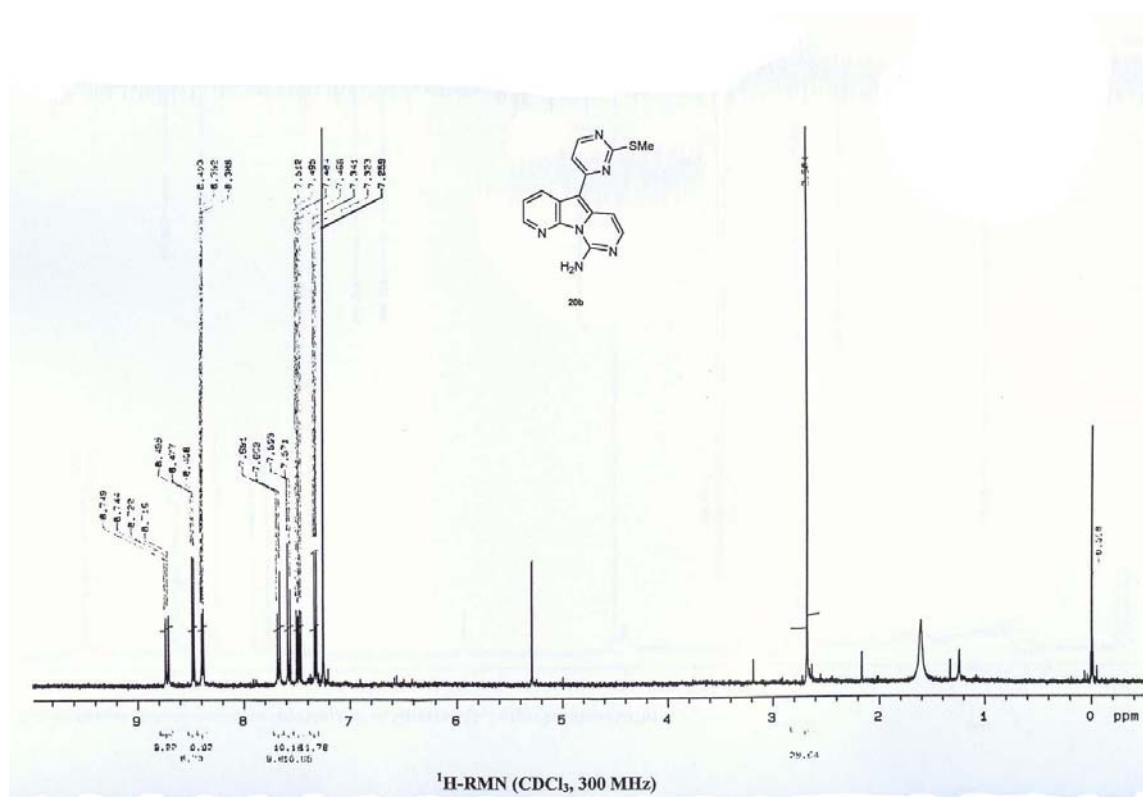

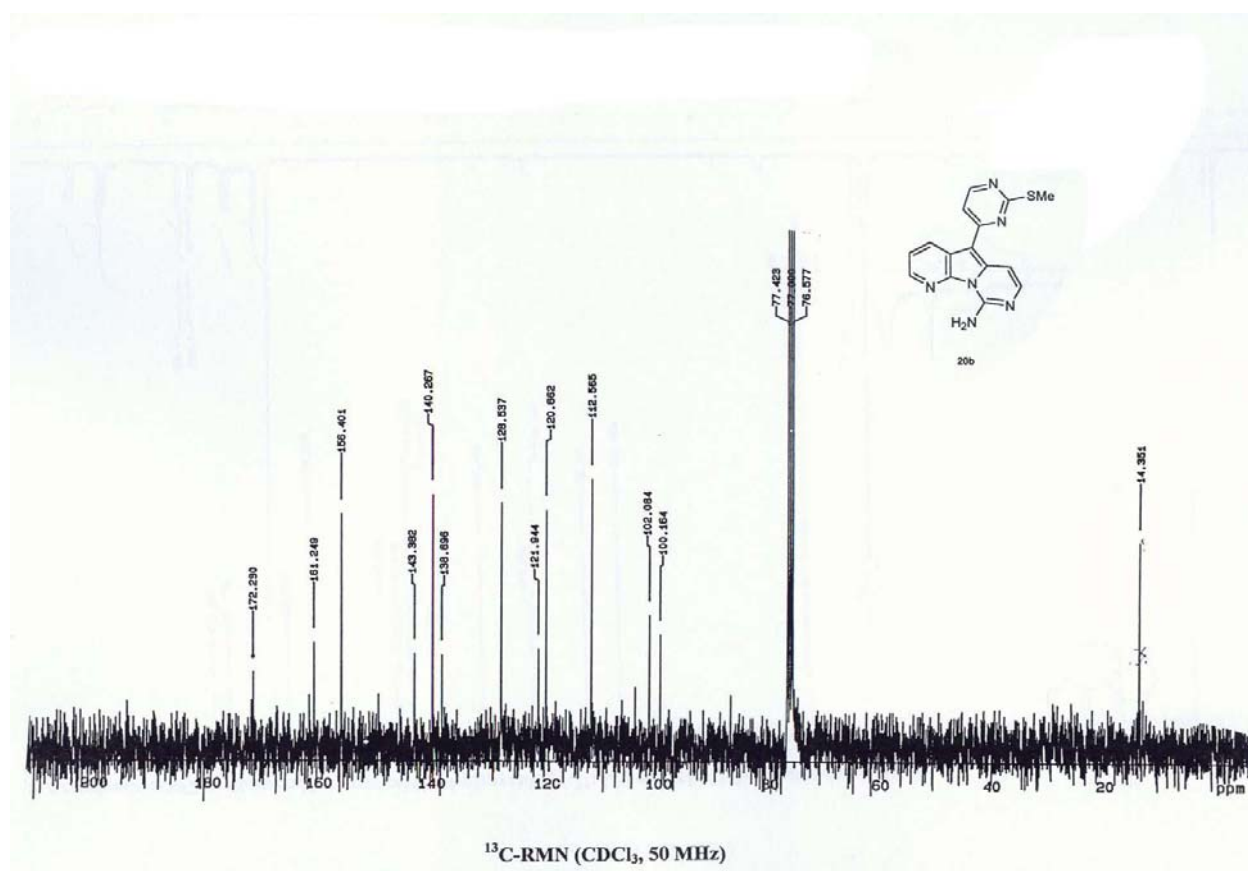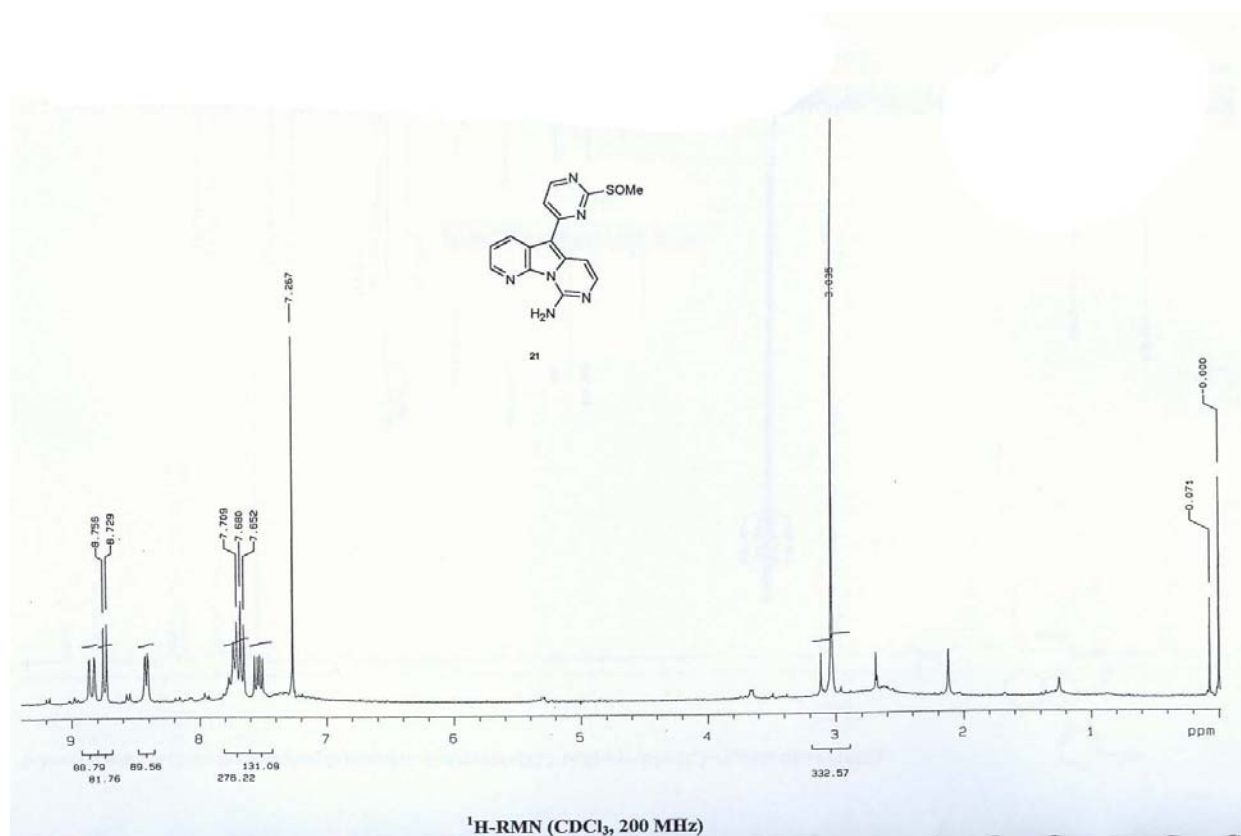

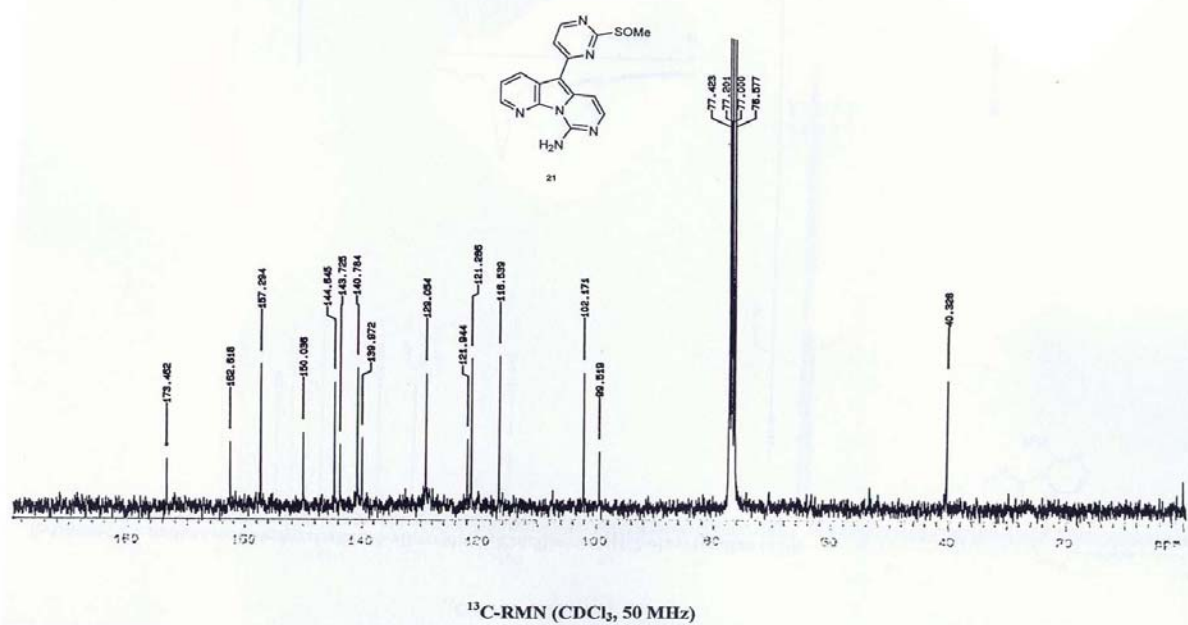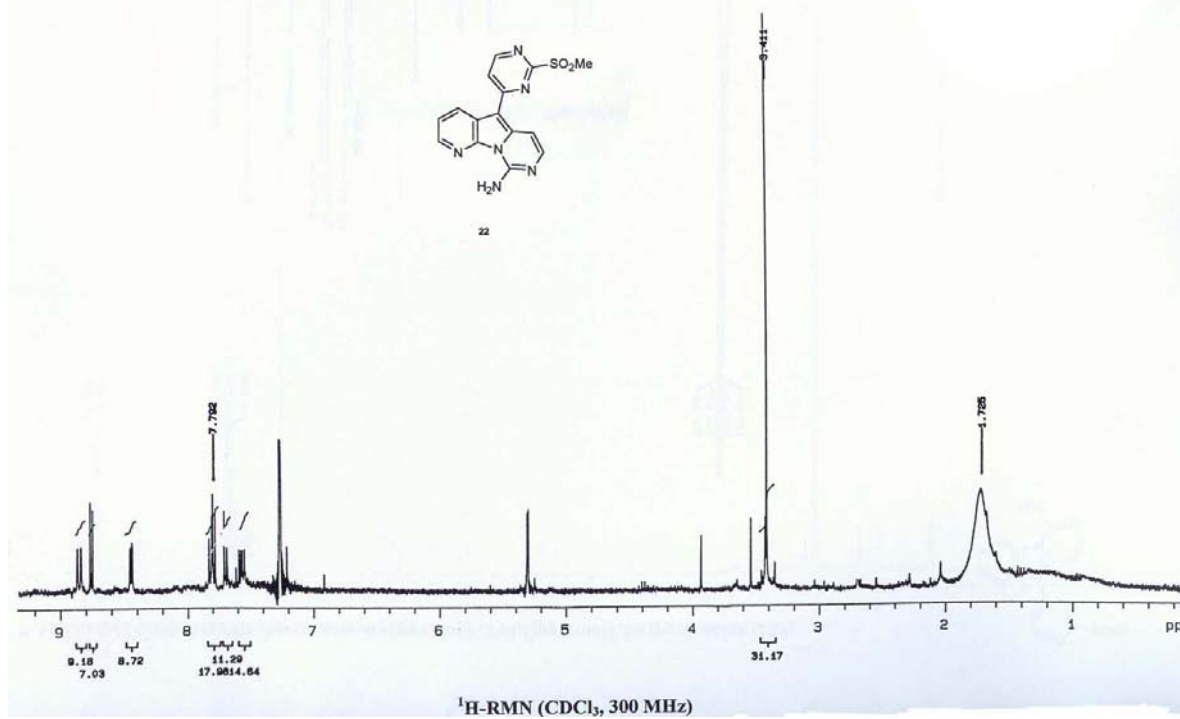



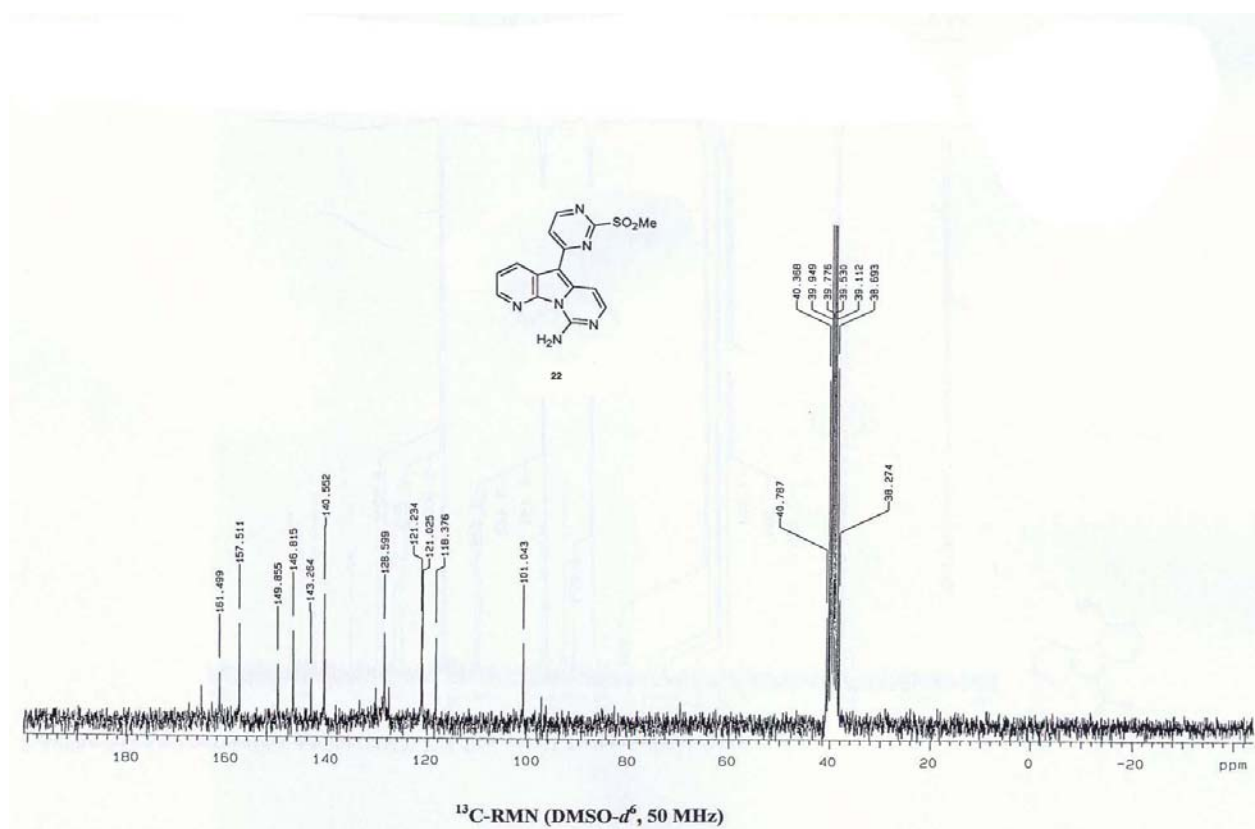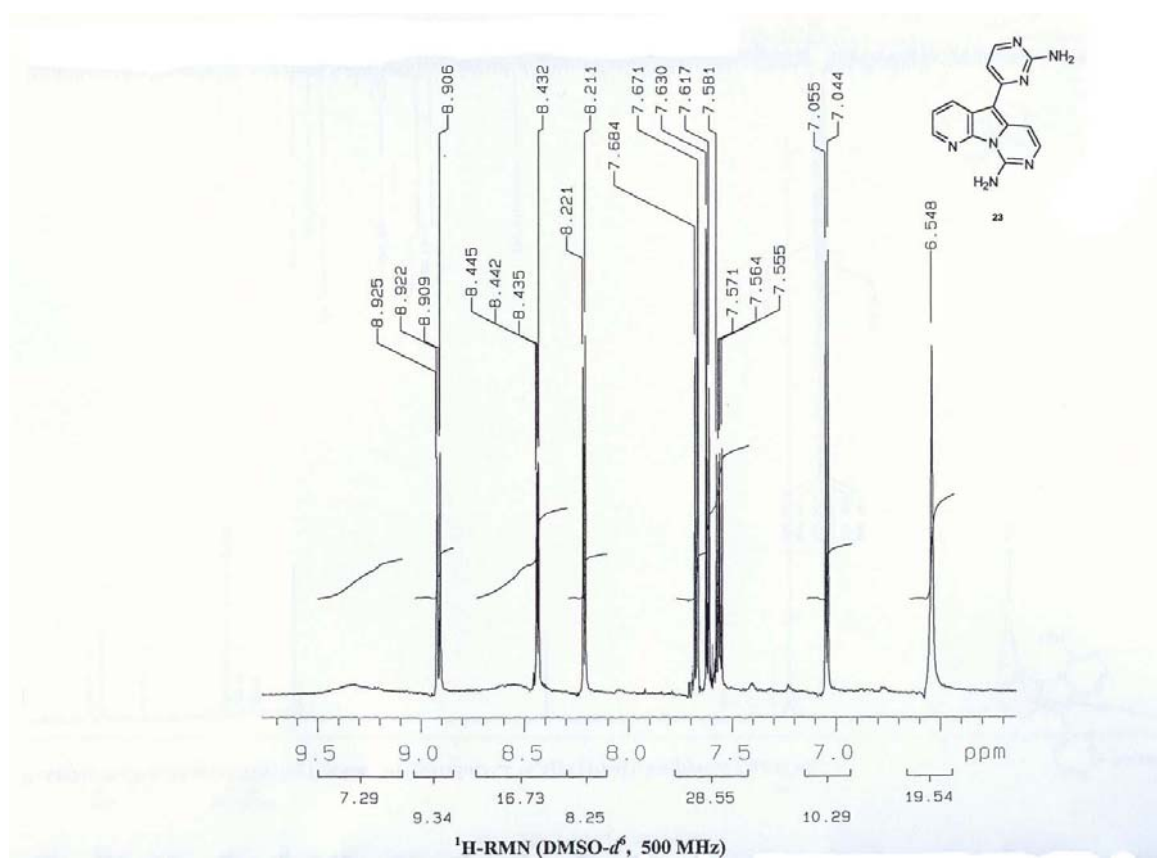



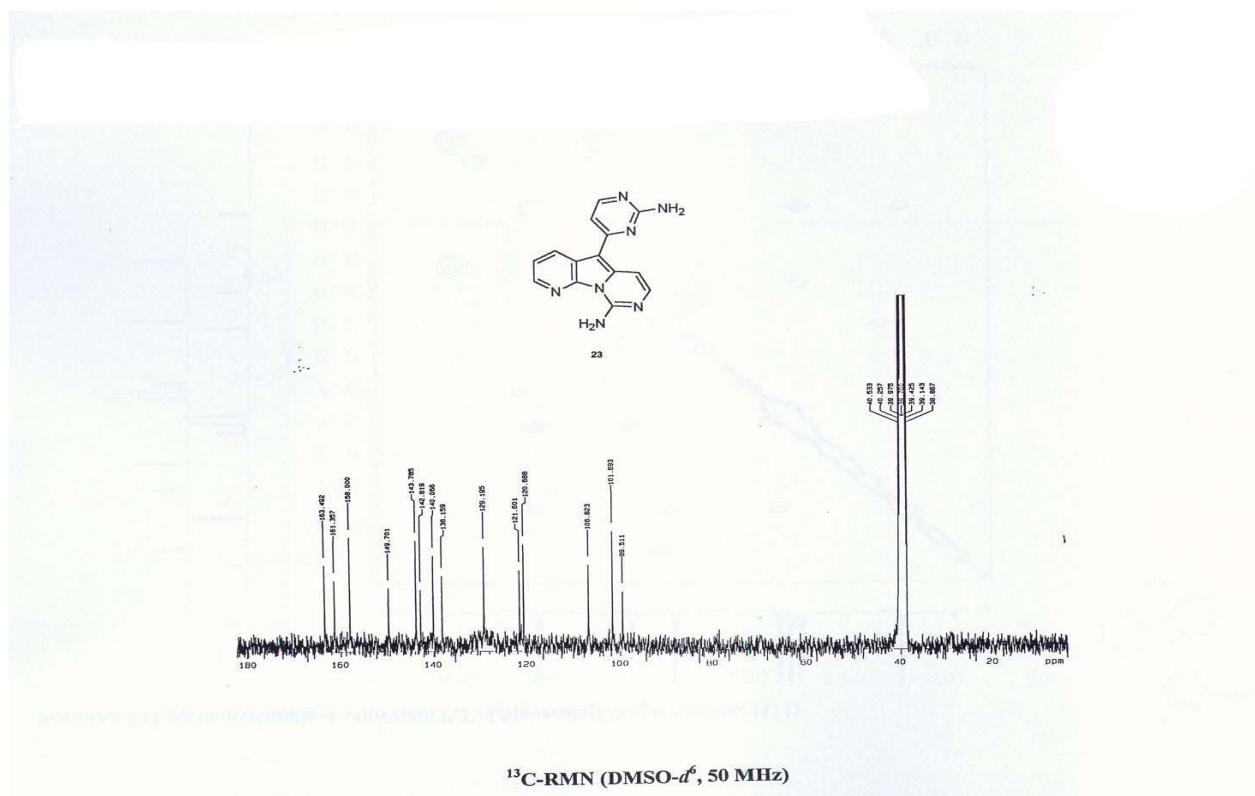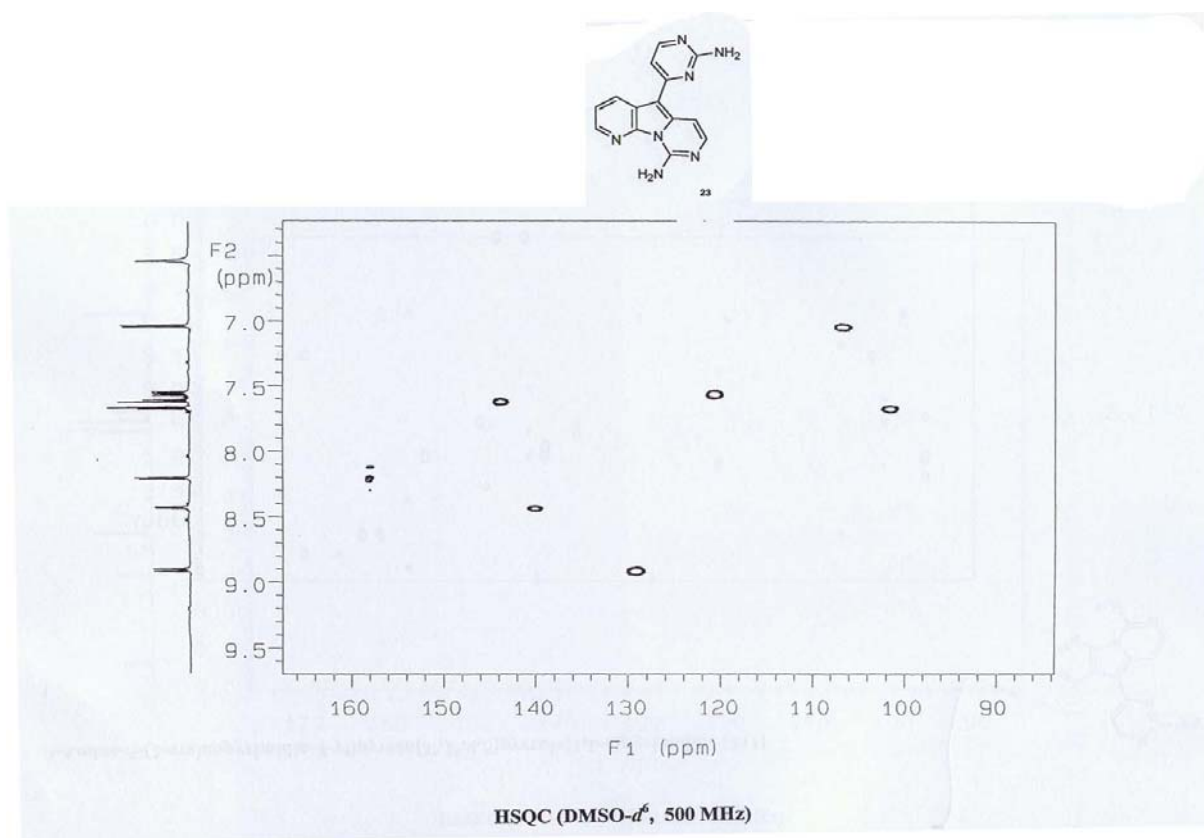

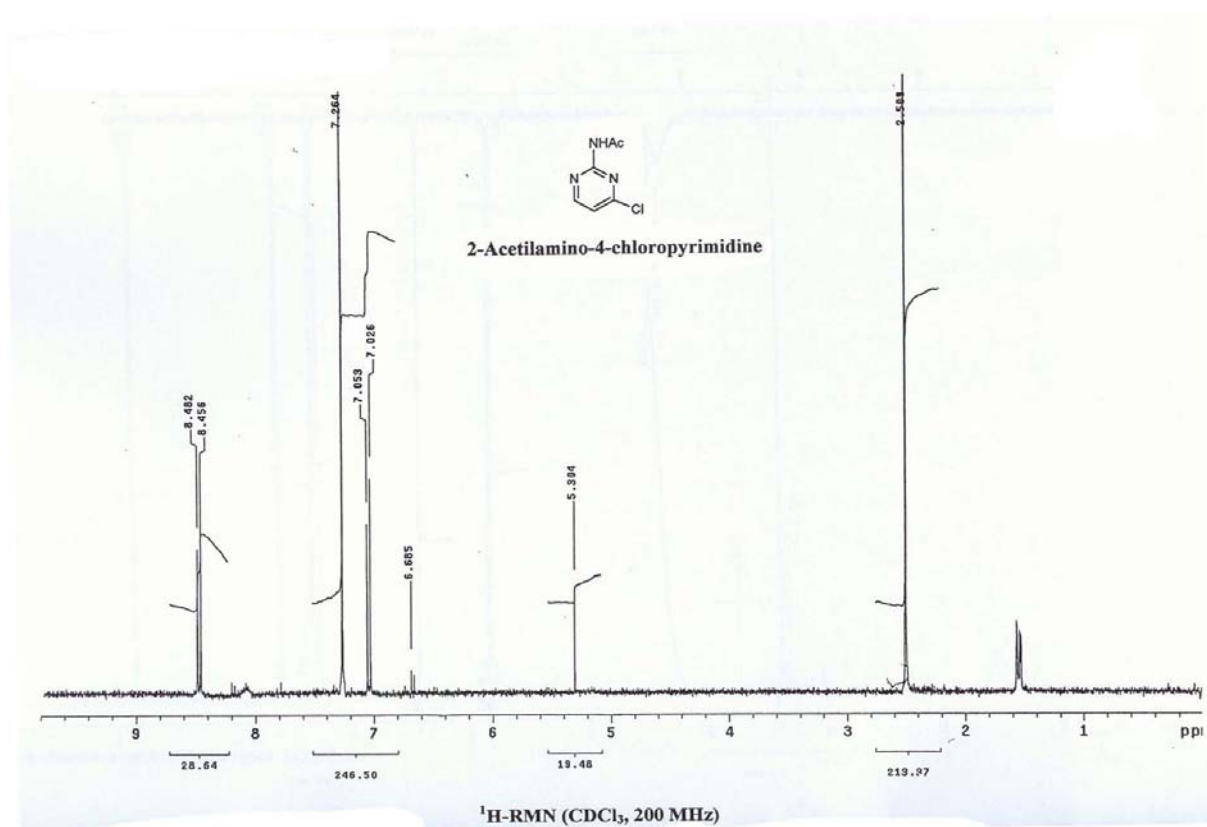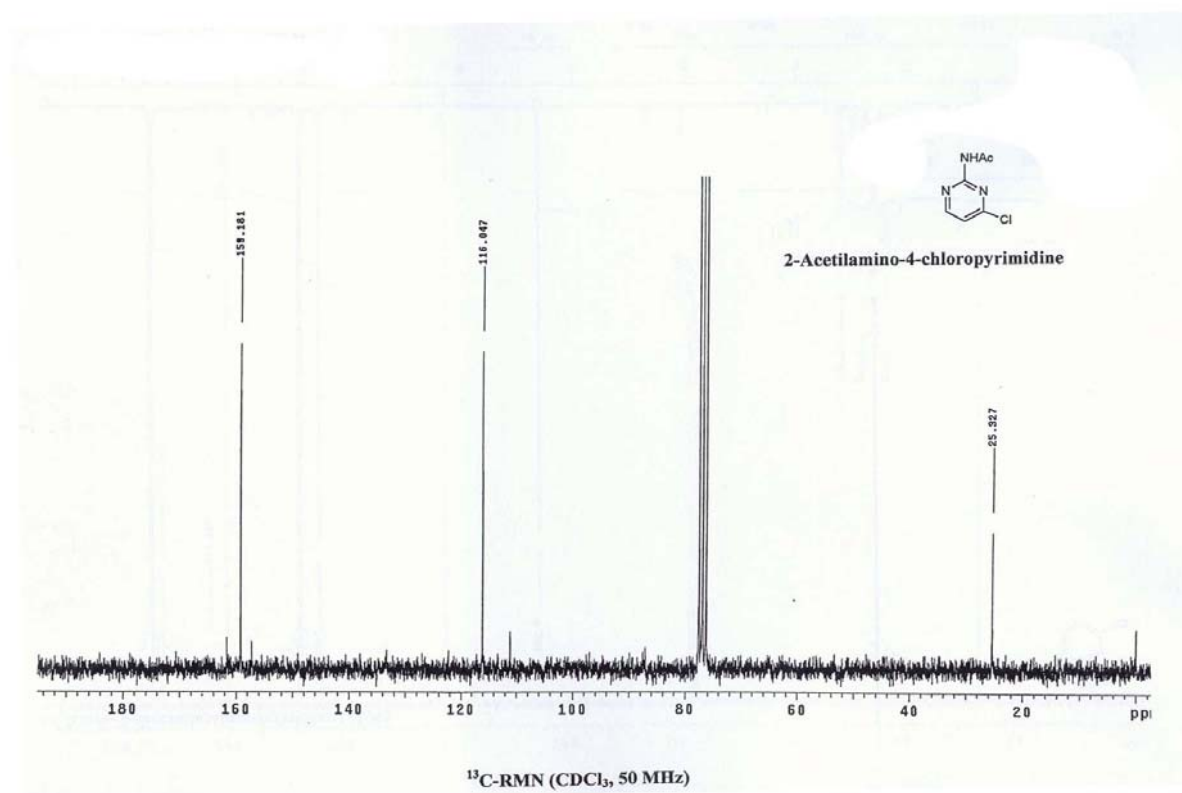

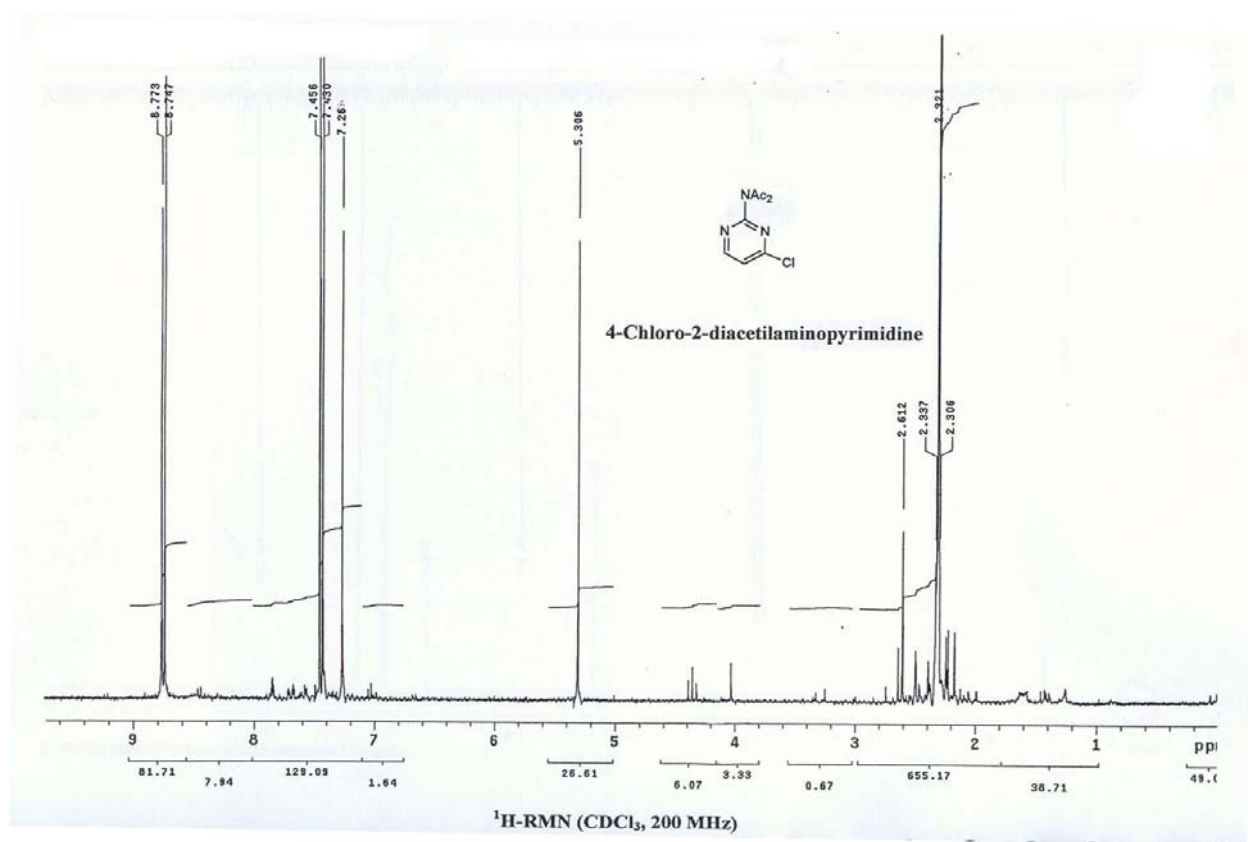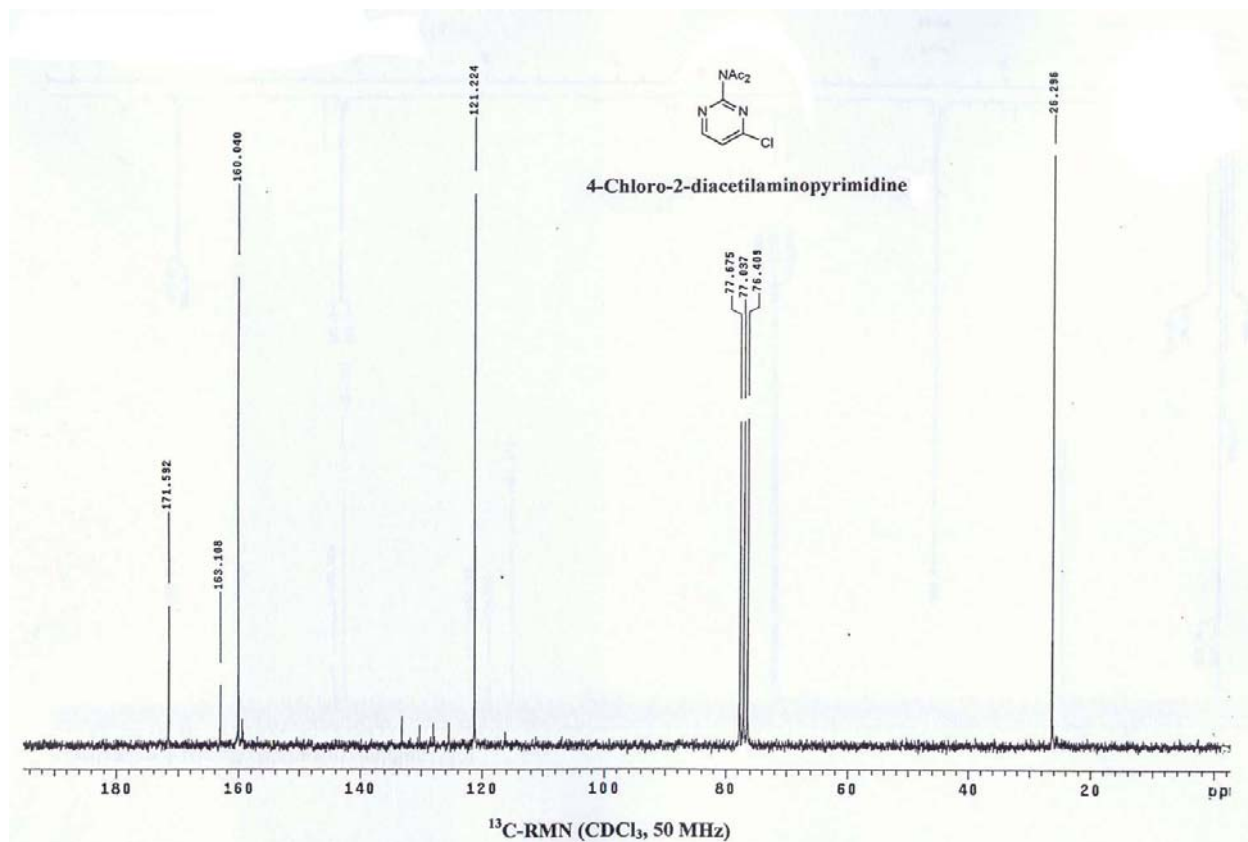

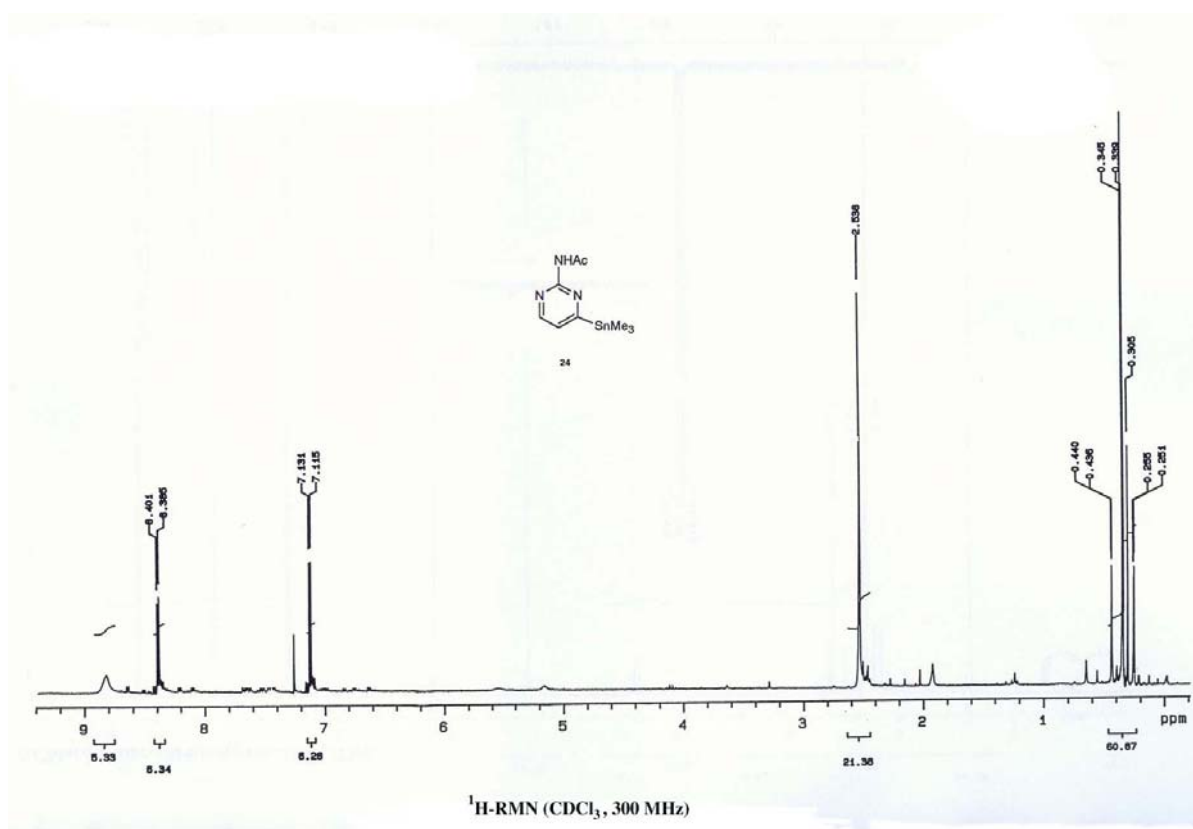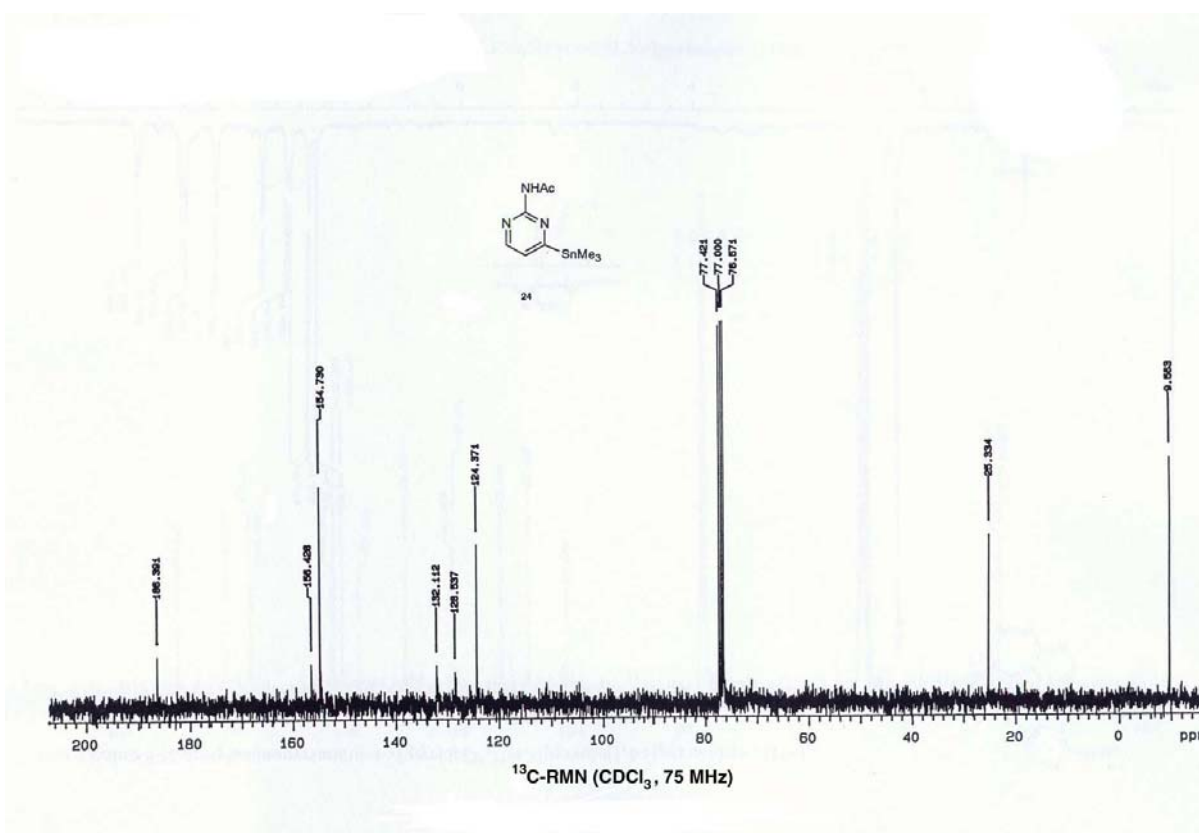

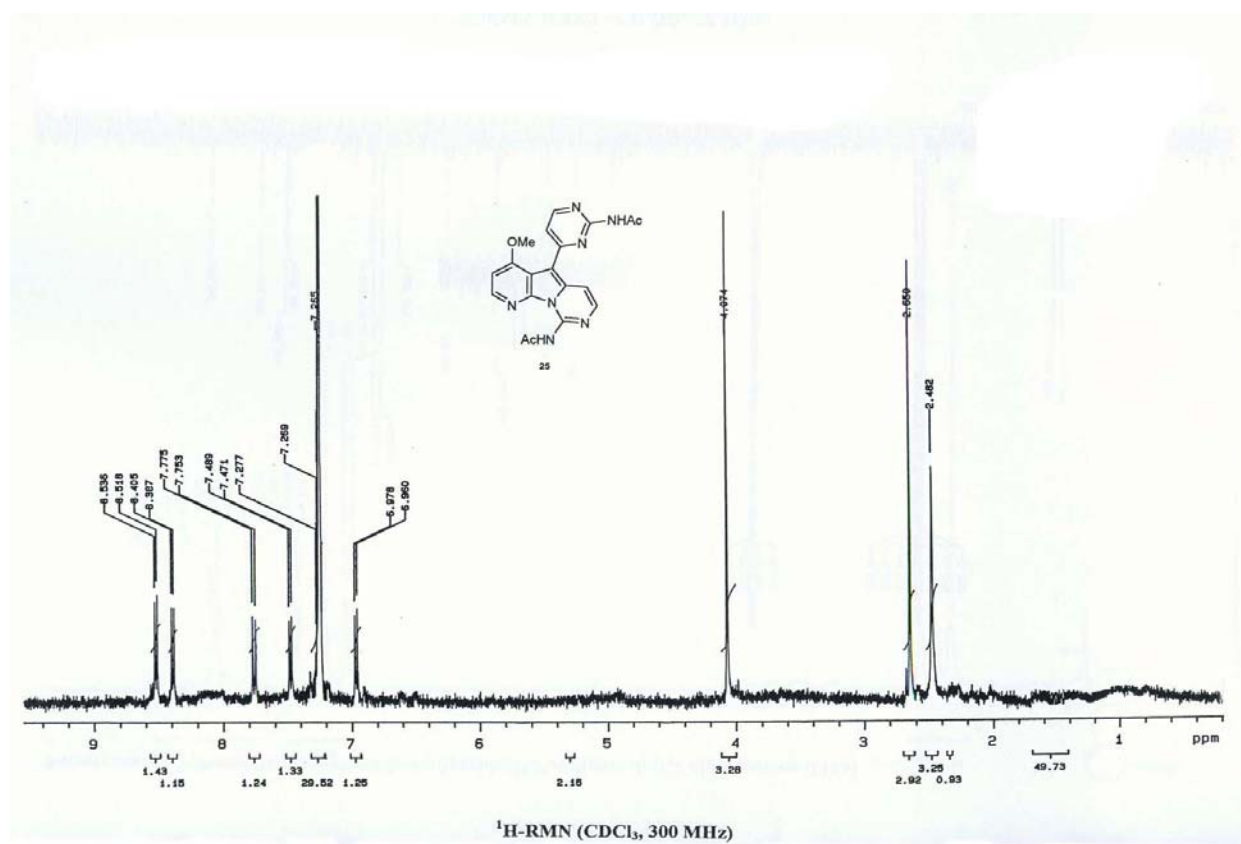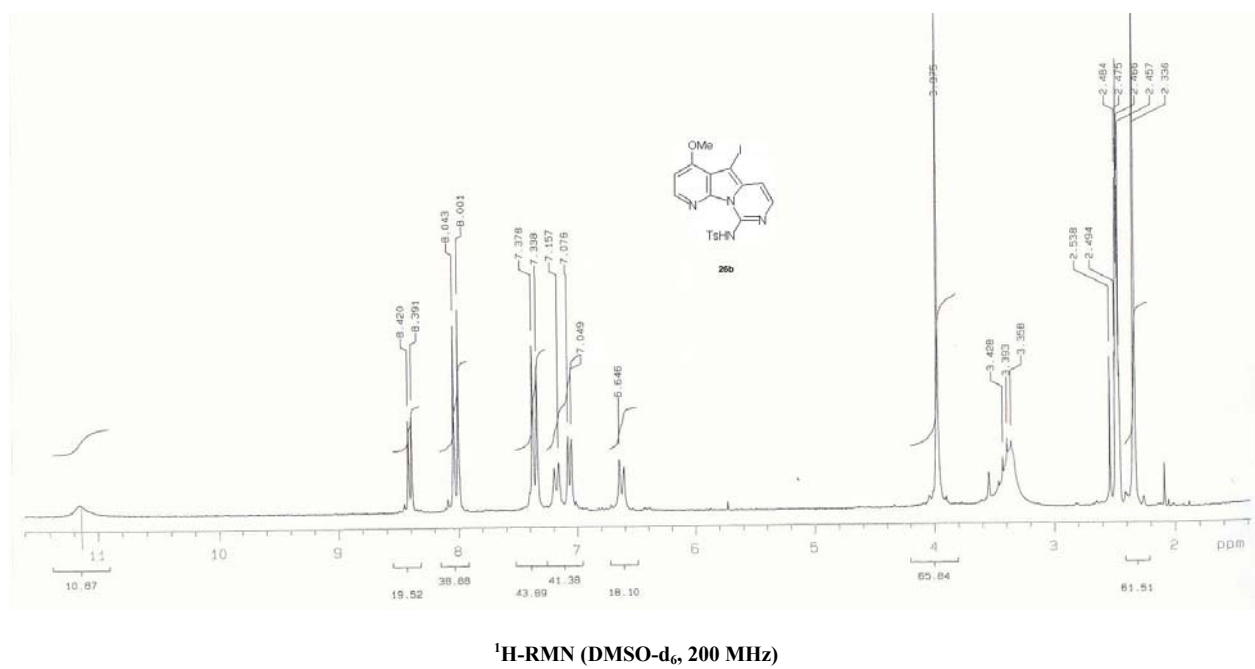

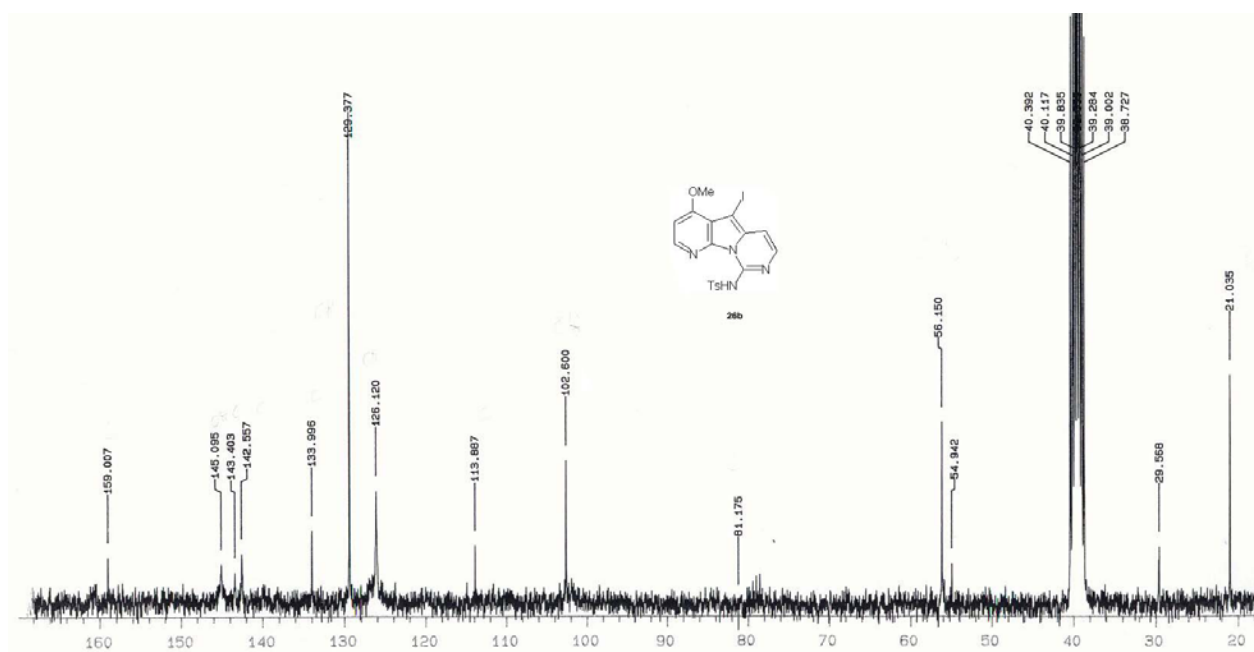

$^{13}\text{C}$ -RMN (DMSO- $d_6$ , 75 MHz)

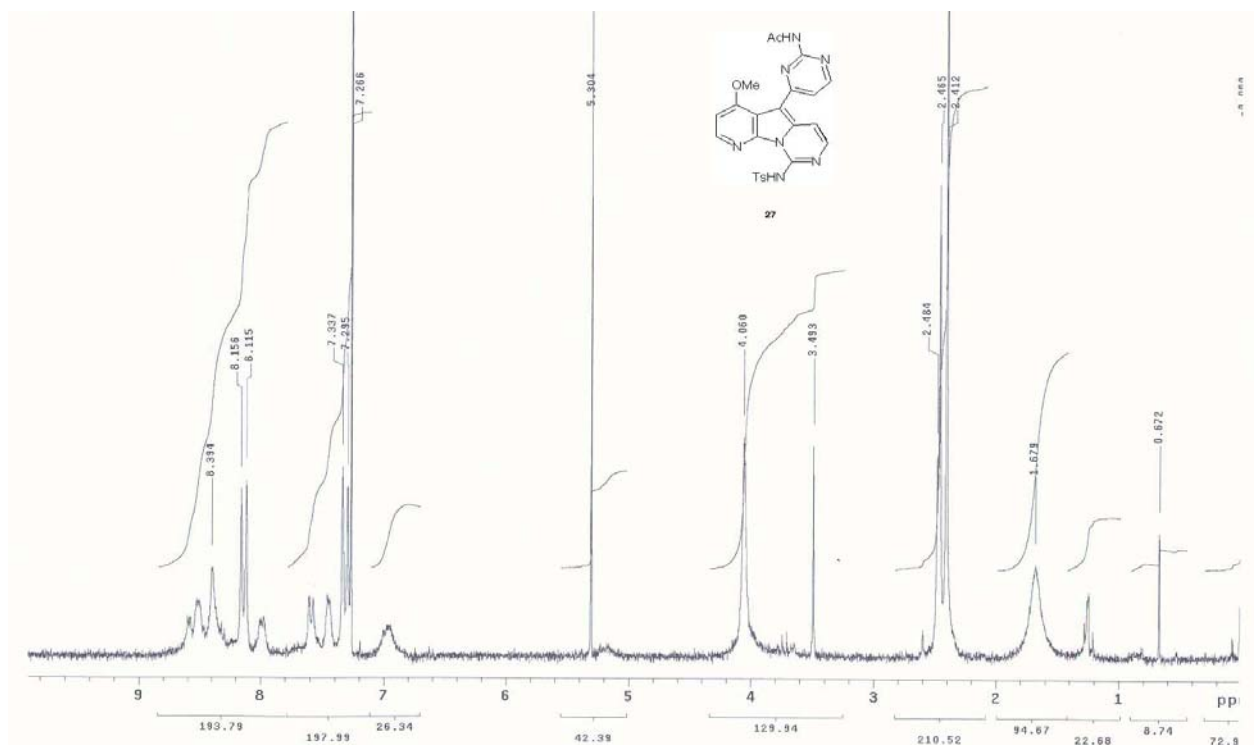

$^1\text{H}$ -RMN ( $\text{CDCl}_3$ , 400 MHz)

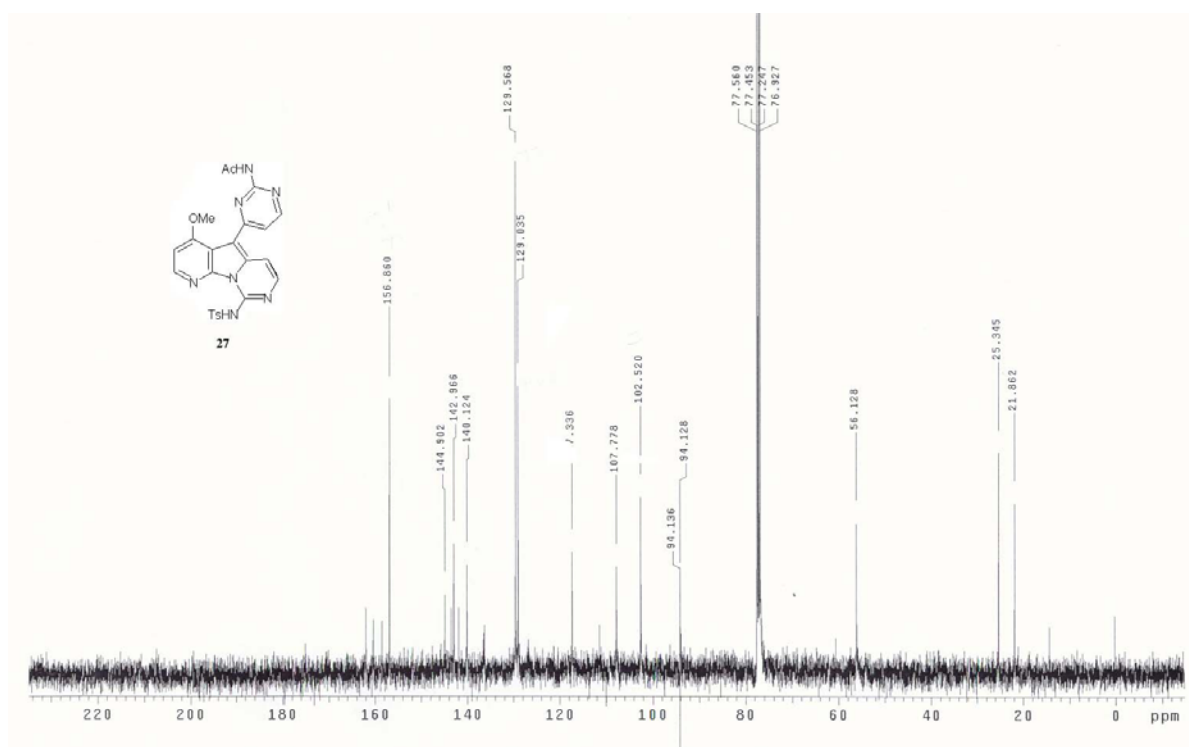

**<sup>13</sup>C-RMN (CDCl<sub>3</sub>, 100 MHz)**

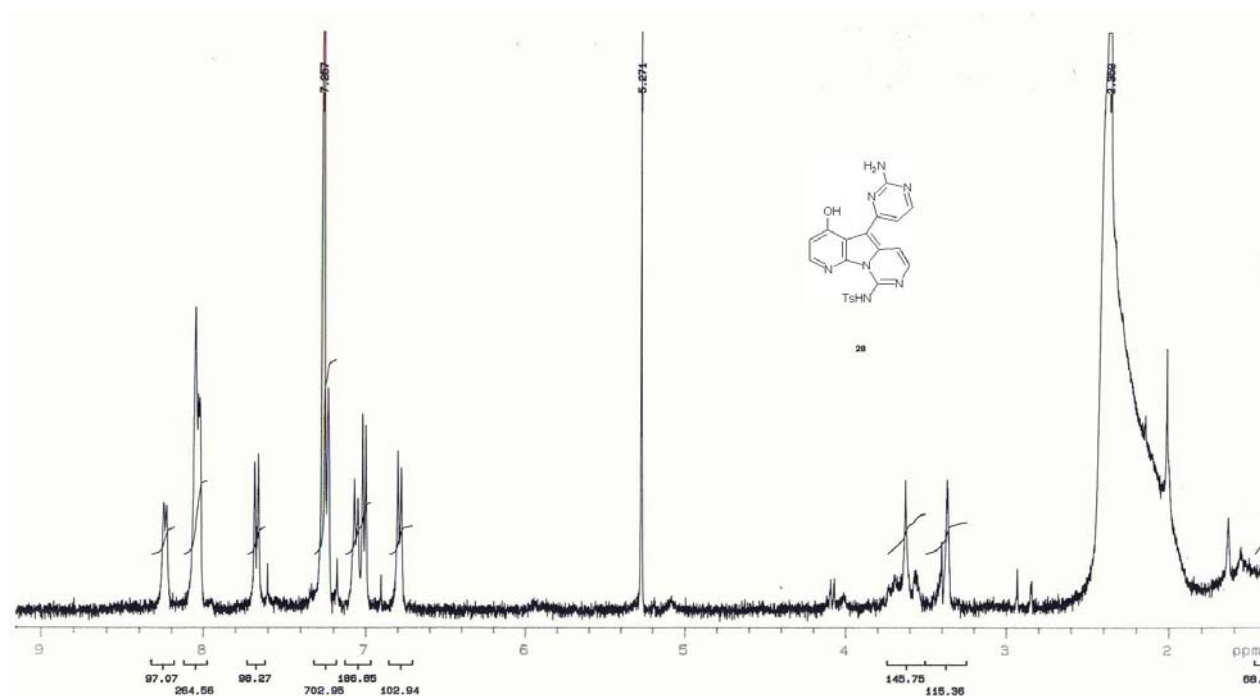

**<sup>1</sup>H-RMN (CDCl<sub>3</sub>-CD<sub>3</sub>OD, 400 MHz)**



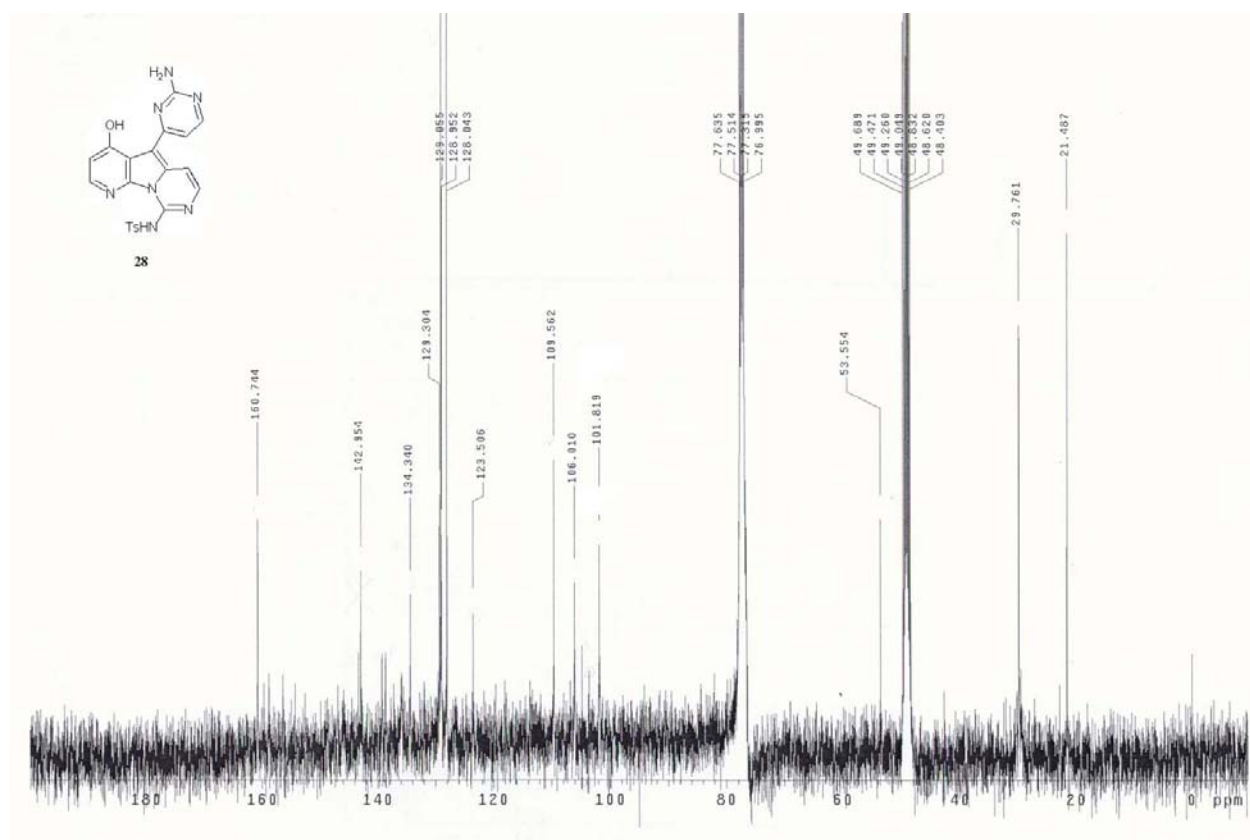

<sup>13</sup>C-RMN (CDCl<sub>3</sub>-CD<sub>3</sub>OD, 100 MHz)
